# Supplementary material for: Caspase inhibition restores dopaminergic identity through the PKA–CREB–BDNF axis in Parkinson’s disease neurons
Source: Research Square preprint supplement (doi:10.21203/rs.3.rs-7289863/v1), 2025-09-04

**Supplementary Information**

**Title**

Caspase inhibition restores dopaminergic identity through the PKA–CREB–BDNF axis in Parkinson’s disease neurons

**Running title** Caspase–PKA–CREB axis in Parkinson’s disease neurons

**Authors**

Giorgia Lucia Benedetto1,7, Raffaele Covello2,7, Stefania Scalise2,*, Caterina Gabriele2, Barbara Puccio1, Desirèe Valente2, Clara Zannino2,3, Pietro Hiram Guzzi1, Pierangelo Veltri4, Andrea Quattrone1,5, Verdon Taylor6, Marco Gaspari2, Aldo Quattrone5,Elvira Immacolata Parrotta1, and Giovanni Cuda2

1 Department of Medical and Surgical Sciences, University Magna Graecia of Catanzaro, Catanzaro, Italy.

2 Department of Experimental and Clinical Medicine, University Magna Graecia of Catanzaro, Catanzaro, Italy.

3 Department of Experimental Medical Science, Lund University, Lund, Sweden.

4 Department of Computer Science, Modeling, Electronics and Systems Engineering (DIMES), University of Calabria, Rende, Italy.

5 Neuroscience Research Center, University Magna Graecia of Catanzaro, Catanzaro, Italy.

6 Embryology and Stem Cell Biology, Department of Biomedicine, University of Basel, Basel, Switzerland.

7 These authors contributed equally to this work

* email to: [stefania.scalise@unicz.it](mailto:stefania.scalise@unicz.it)

Supplemental Figures

- Supplemental Figures 1 to 3 and their legends


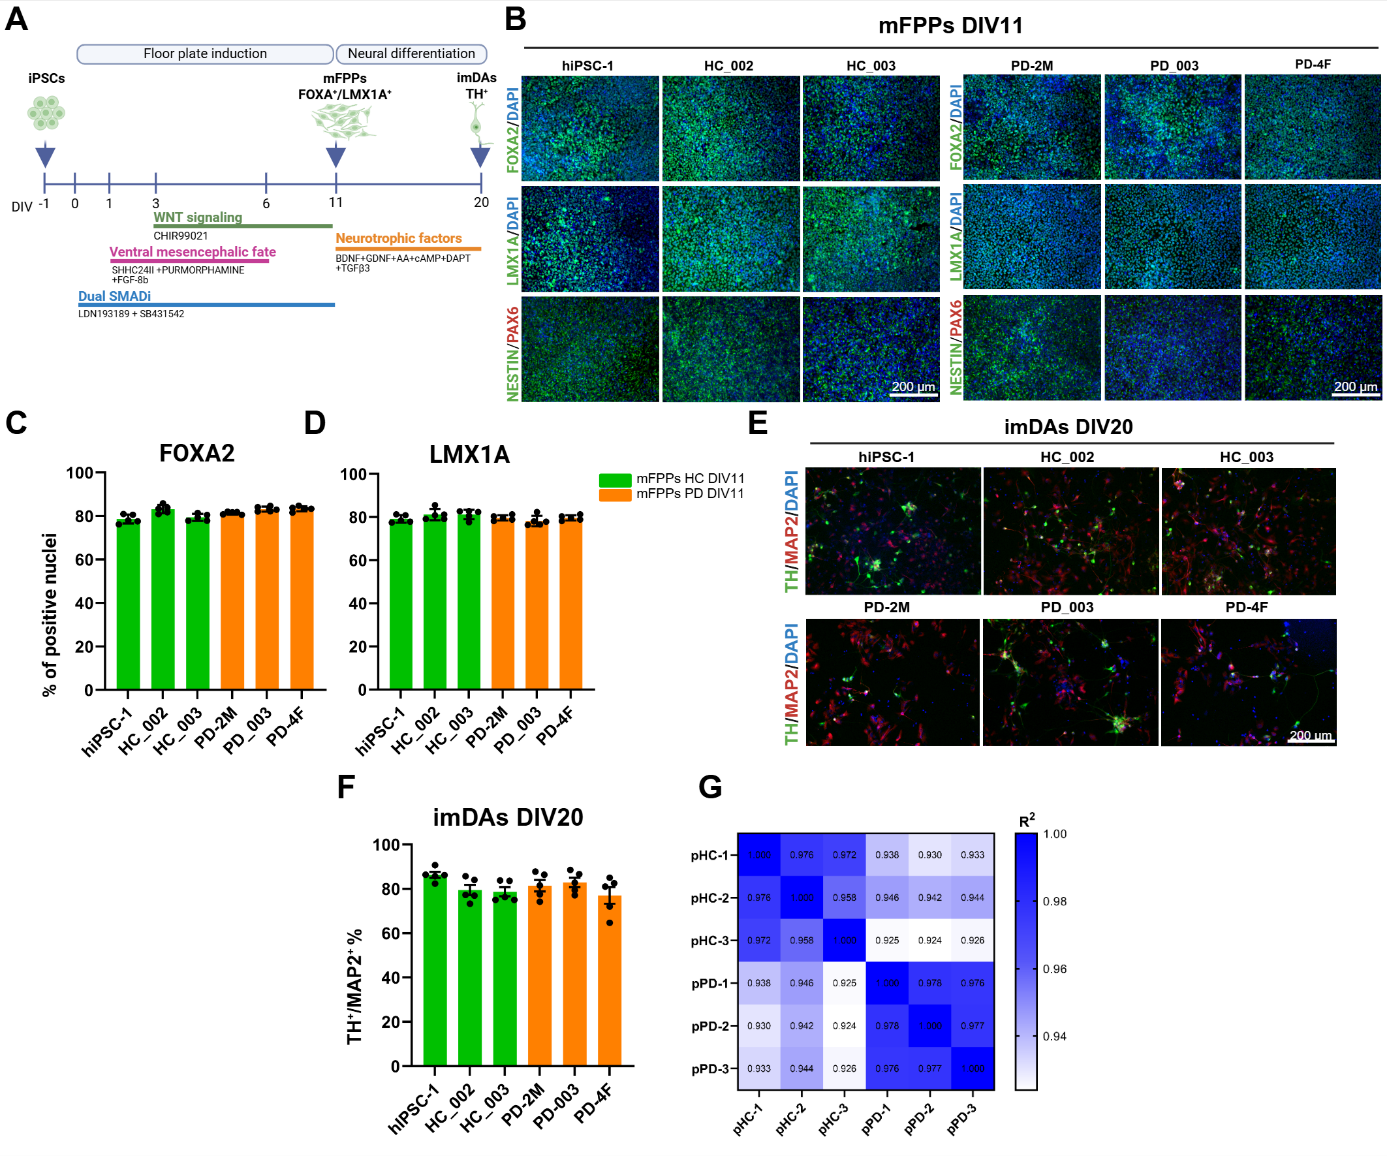


**Supplementary Fig. S1 (related to Figure 1). Characterization of mDA neuron differentiation from iPSCs.** **A** Schematic overview of the differentiation protocol from iPSCs to midbrain floor plate progenitors (mFPPs) and subsequently to immature mDA neurons. **B** Representative immunofluorescence images of FOXA2, LMX1A, NESTIN, and PAX6 (green) in mFPPs at DIV11. Magnification: 20X. **C** Quantification of FOXA2 and (**D**) LMX1A positive-nuclei in mFPPs at DIV11. Both quantifications were based on N = 5 images per group, data are presented as mean ± s.e.m.. **E** Representative immunofluorescence images of TH (green) and MAP2 (red) in mDAs at DIV20. **F** Quantification of the percentage of TH⁺/MAP2⁺ cells performed at DIV20. Quantification was based on N = 5 images per group. Data are presented as mean ± s.e.m.. **G** Pearson correlation matrix of RNA-seq data from pooled HC and pooled PD mDA neurons at DIV60. DIV, days in vitro.


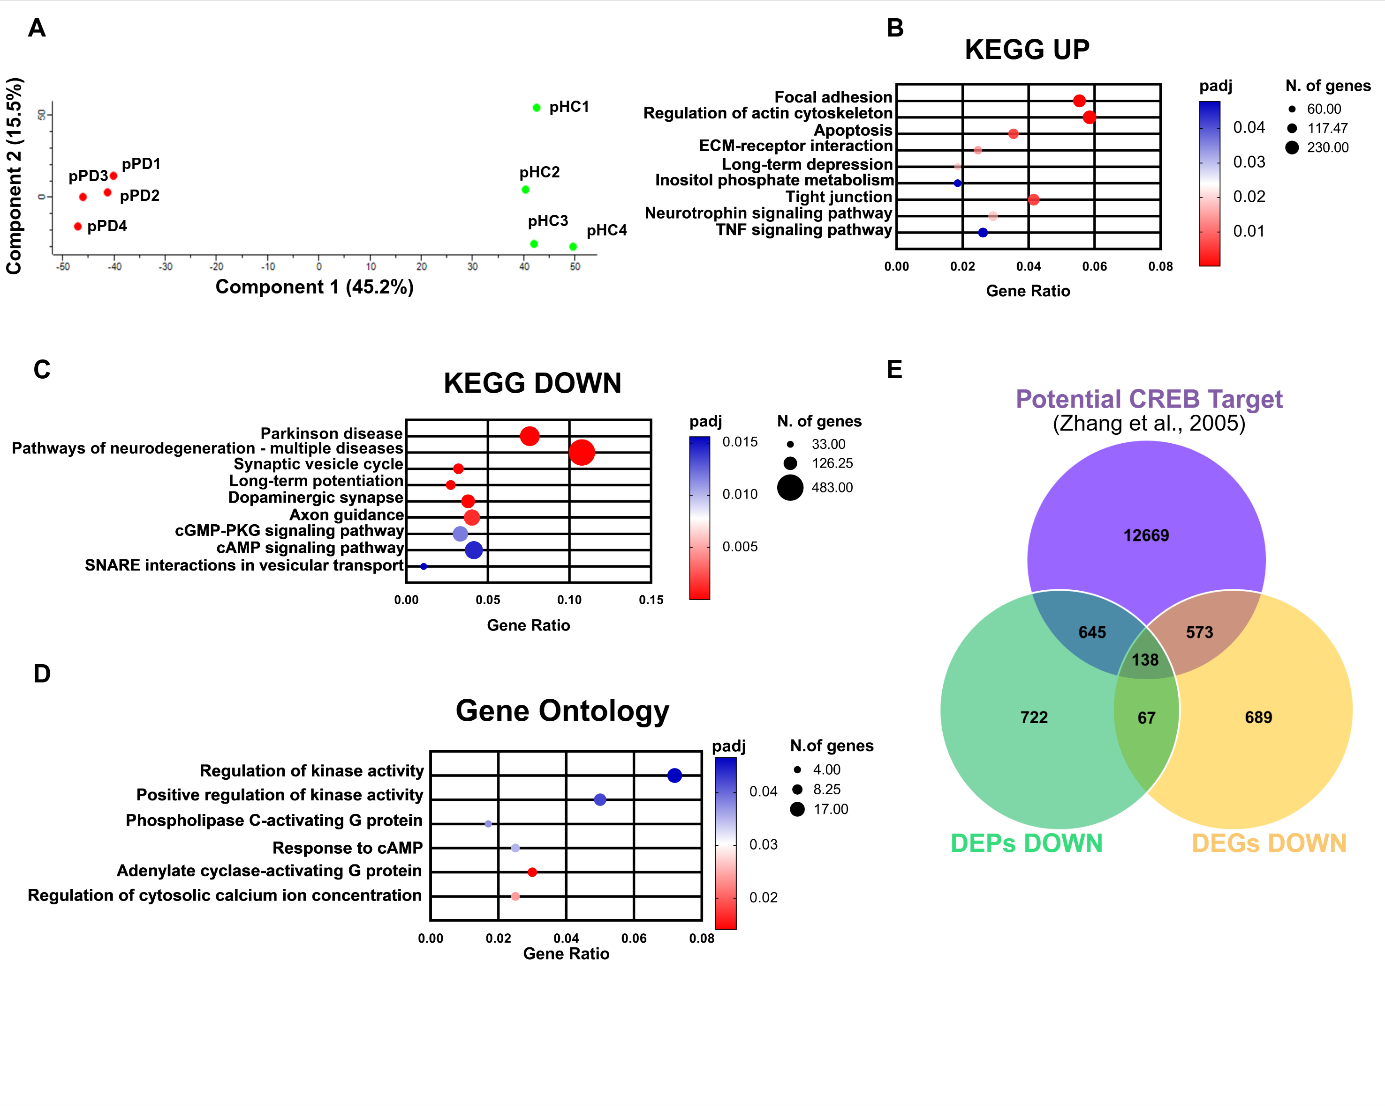


**Supplementary Figure S2 (related to Figure 4). Proteomic and transcriptomic analyses reveal PKA-CREB pathway dysregulation in pPD mDA neurons. A** Principal Component Analysis (PCA) of proteomic profiles from pHC and pPD mDA neurons at DIV60. **B** KEGG pathway enrichment analysis of significantly upregulated proteins in pPD compared to pHC. **C** KEGG pathway enrichment analysis of significantly downregulated proteins in pPD. **D** GO enrichment analysis of DEPS proteins showing significant association with the PKA-CREB signaling cascade. For (**B**), (**C**), and (**D**), data were analyzed by ClusterProfiler R package, with a significance threshold set at *p*-value ≤ 0.05. **E** Venn diagram showing the overlap between downregulated DEPs, downregulated DEGs, and CREB target genes as reported in Zhang et al., 2025.

**Supplementary Figure S3 (related to Figure 7). Caspase inhibition by Q-VD-OPh in pPD mDA neurons. A** Experimental timeline of Q-VD-OPh treatment in mDA neurons. **B** Western blot analysis of cleaved CASP3 and CASP7 in mDAs neurons after treatment with increasing concentrations of Q-VD-OPh (0.5, 1, and 10 µM). **C** Representative images of the dopamine analog FFN 102 uptake (0 min) and KCl-induced release captured at 2, 4, and 6 minutes after KCl administration in pPD and Q-VD-OPh-treated pPD mDAs.
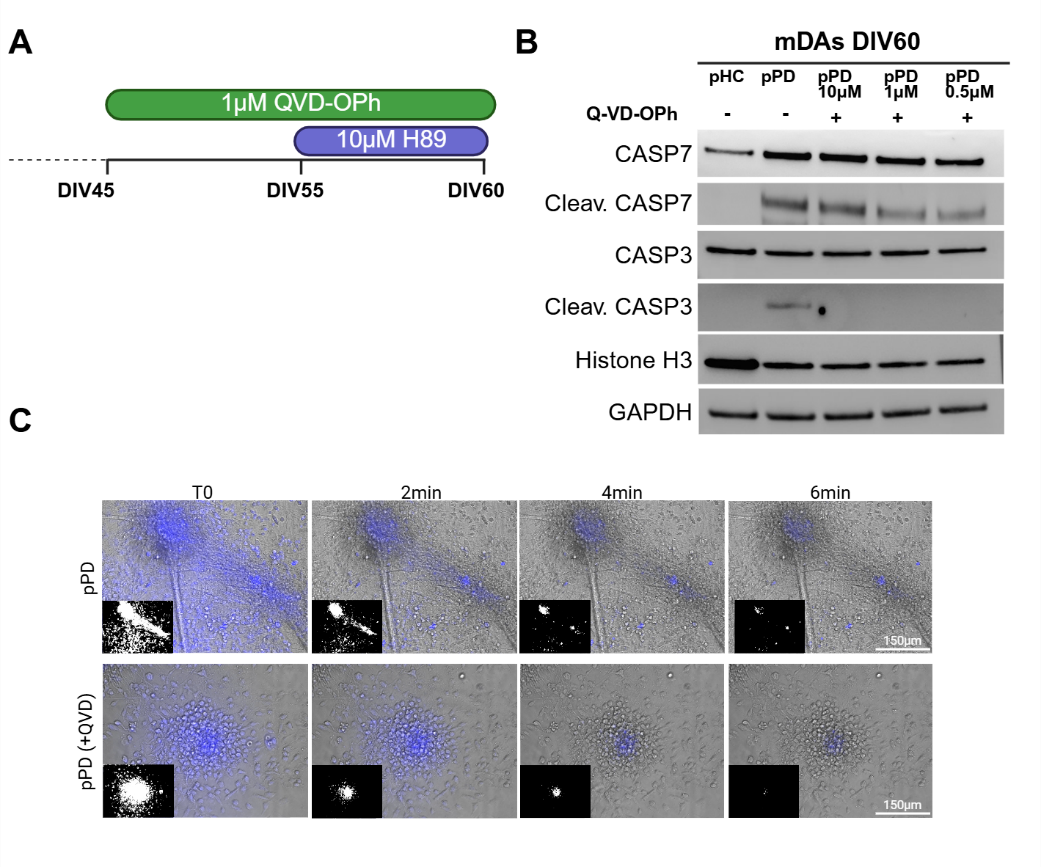

Supplement: Supplementary file 5 [file ece70b412e8af4a7aaf05cec.docx]
