# Supplementary material for: Caspase inhibition restores dopaminergic identity through the PKA–CREB–BDNF axis in Parkinson’s disease neurons
Source: Research Square preprint supplement (doi:10.21203/rs.3.rs-7289863/v1), 2025-09-04
Supplement: Supplementary file 1 [file 11e7ac5662b1443bb769307b.xlsx]

## Sheet: Table S2_Patients
Table S2: Cell Line Identifiers and Characteristics
Healthy control	Age	Gender
hiPSC-1	54	M
HC_002	64	M
HC_003	76	F
Patient	Age	Gender
PD-2M	66	M
PD_003	71	F
PD-4F	57	F
