# Supplementary material for: Caspase inhibition restores dopaminergic identity through the PKA–CREB–BDNF axis in Parkinson’s disease neurons
Source: Research Square preprint supplement (doi:10.21203/rs.3.rs-7289863/v1), 2025-09-04
Supplement: Supplementary file 2 [file 7d89226f42f681defe9eee20.xlsx]

## Sheet: Table S1_Reagents
Table S1: Antibodies, Medium and small molecules used in this work
Primary antibody	Isotype	Manufacturer	Application
FOXA2	Rabbit	Abcam (AB108422)	IF (1:300)
LMX1A	Rabbit	Invitrogen (PA115517)	IF (1:300)
PAX6	Rabbit	Invitrogen (426600)	IF (1:100)
NESTIN	Mouse	StemCell Technologies (600S1)	IF (1:1000)
FOXA2	Mouse	Santa Cruz (sc101060)	IF (1:1000)
NURR1	Mouse	Santa Cruz (sc376984)	IF (1:200) WB (1:500)
TH	Rabbit	Cell Signaling (BK5884S)	IF (1: 100) WB (1:1000)
TH	Mouse	Invitrogen (MA124654)	IF (1:150)
DDC	Goat	Invitrogen (PA547512)	IF (1:200)
GIRK2	Goat	Abcam (AB65096)	IF (1:100)
MAP2	Chicken	Thermo Fisher (PA10005)	IF (1:5000)
TUJ1	Mouse	Invitrogen (48001)	IF (1:250)
α-synuclein	Rabbit	Cell Signaling (51510S)	WB (1:500)
p-α-synuclein (Ser129)	Rabbit	Cell Signaling (23706S)	IF (1:500)
SQSTM1 (p62)	Mouse	Abcam (AB56416)	IF (1:50)
FASL	Rabbit	Cell Signaling (4273)	WB (1:1000)
Caspase-7	Rabbit	Cell Signaling (9492)	WB (1:1000)
BAX	Rabbit	Cell Signaling (2772)	WB (1:1000)
Caspase-3	Mouse	Cell Signaling (9668)	WB (1:1000)
Synaptophysin	Rabbit	Abcam (ab32127)	WB (1:20000) IF (1:100)
PSD-95	Mouse	Invitrogen (MA1046)	WB (1:2000) IF (1:500)
CREB	Mouse	Cell Signaling (2402)	WB (1:1000)
p-CREB (Ser133)	Rabbit	Cell Signaling (9198)	WB (1:1000)
Ubiquitin	Mouse	Antibodies (A85456)	WB (1:1000) IF (1:1000)
Caspase-2	Mouse	Cell Signaling (2224)	WB (1:1000)
Histone H3	Rabbit	Abcam (AB1719)	WB (1:1000)
GAPDH	Rabbit	Bioss Antibodies	WB (1:1000)
Anti-Mouse IgG Alexa Fluor 488	Goat	Invitrogen (A11001)	IF (1:2000)
Anti-Rabbit IgG Alexa Fluor 488	Goat	Invitrogen (A11008)	IF (1:500)
Anti-Rabbit IgG Alexa Fluor 594	Goat	Invitrogen (A11012)	IF (1:500)
Anti-Mouse IgG Alexa Fluor 594	Goat	Invitrogen (A11005)	IF (1:200)
Anti-Goat IgG Alexa Fluor 594	Donkey	Invitrogen A-11058	IF (1:500)
Anti-Chicken IgY (H+L) Alexa Fluor 594	Goat	Invitrogen (A32759)	IF (1:200)
Peroxidase AffiniPure Donkey Anti-Rabbit IgG (H+L)	Donkey	Jackson Immuno Research (711-035-152)	WB (1:10000)
Peroxidase AffiniPure Sheep Anti-Mouse IgG (H+L)	Sheep	Jackson Immuno Research (515-035-062)	WB (1:10000)
Knockout serum replacement medium	Final Concentration	Manufacturer	Catalog number
Knockout DMEM	v/v	GibcoTM	Cat#10829-018
KnockOut Serum Replacement (KSR)	0.15	GibcoTM	Cat#10828-028
Glutamax	2mM	GibcoTM	Cat#35050-061
MEM-NEAA	1X	GibcoTM	Cat#11140-050
Penicillin/Streptomycin	50U/ml/50mg/ml	GibcoTM	Cat#15070063
β- mercaptoethanol	55µM	GibcoTM	Cat#21985-023
Filter medium before adding β-mercaptoethanol. Store the media at at 4°C for only one week.
N2 medium	Final Concentration	Manufacturer	Catalog number
DMEM/F12 with Hepes buffer	v/v	GibcoTM	Cat#31330-038
Glutamax	2mM	GibcoTM	Cat#35050-061
Penicillin/Streptomycin	50U/ml/50mg/ml	GibcoTM	Cat#15070063
N2 supplement	1X	GibcoTM	Cat#17502-048
Add N2 supplement before using the medium fresh and do not filter. Store the media at 4°C for only one week.
NB/B27 medium	Final Concentration	Manufacturer	Catalog number
Neurobasal	v/v	GibcoTM	Cat#21103
Glutamax	2mM	GibcoTM	Cat#35050-061
Penicillin/Streptomycin	50U/ml/50mg/ml	GibcoTM	Cat#15070063
B27 supplement	1X	GibcoTM	Cat#17504-044
Add B27 supplement to the fresh media and do not filter. Store the medium supplement with B27 at 4°C only for one week.
Cytokines
Product name	Supplier	Catalog number
SB431542	Miltenyi Biotec	#130-105-336
LDN193189	Miltenyi Biotec	#130-106-540
SHHC24II	Miltenyi Biotec	# 130-095-727
PURMORPHAMINE	Millipore	#540220
Human FGF-8b	Miltenyi Biotec	#130-095-740
CHIR99021	Miltenyi Biotec	#130-106-539
BDNF	Miltenyi Biotec	#130-096-286
GDNF	ReD	# 212-GD/CF
DAPT	Tocris	#2634
TGFB3	Peprotech	#100-36E
Db-cAMP	Sigma	#D0260
Ascorbic Acid	Sigma	#A5960
