# Supplementary material for: Caspase inhibition restores dopaminergic identity through the PKA–CREB–BDNF axis in Parkinson’s disease neurons
Source: Research Square preprint supplement (doi:10.21203/rs.3.rs-7289863/v1), 2025-09-04
Supplement: Supplementary file 4 [file c23e9cb108591689288d6671.xlsx]

## Sheet: Table S5_DEPs
Table S5: DEPS UP and Down in pPD vs pHC at DIV60
T: PG.Genes	T: PG.ProteinDescriptions	Fold Change PD/HC	LOG2 FC	C: Student's T-test Significant PD_HC	[1] P-UMG-Neurons-HC-1.raw.PG.Quantity	[2] P-UMG-Neurons-HC-2_20240920163930.raw.PG.Quantity	[3] P-UMG-Neurons-HC-3.raw.PG.Quantity	[4] P-UMG-Neurons-HC-4.raw.PG.Quantity	[5] P-UMG-Neurons-PD-1.raw.PG.Quantity	[6] P-UMG-Neurons-PD-2.raw.PG.Quantity	[7] P-UMG-Neurons-PD-3.raw.PG.Quantity	[8] P-UMG-Neurons-PD-4.raw.PG.Quantity	HC-1	HC-2	HC-3	HC-4	PD-1	PD-2	PD-3	PD-4	Mediana HC	Mediana PD	Fold Change PD/HC	C: Student's T-test Significant PD_HC	C: Student's T-test significant	C: GOBP name	C: GOMF name	C: GOCC name	C: KEGG name	C: Corum	C: Reactome	N: [1] P-UMG-Neurons-HC-1.raw.PG.NrOfStrippedSequencesUsedForQuantification	N: [2] P-UMG-Neurons-HC-2_20240920163930.raw.PG.NrOfStrippedSequencesUsedForQuantification	N: [3] P-UMG-Neurons-HC-3.raw.PG.NrOfStrippedSequencesUsedForQuantification	N: [4] P-UMG-Neurons-HC-4.raw.PG.NrOfStrippedSequencesUsedForQuantification	N: [5] P-UMG-Neurons-PD-1.raw.PG.NrOfStrippedSequencesUsedForQuantification	N: [6] P-UMG-Neurons-PD-2.raw.PG.NrOfStrippedSequencesUsedForQuantification	N: [7] P-UMG-Neurons-PD-3.raw.PG.NrOfStrippedSequencesUsedForQuantification	N: [8] P-UMG-Neurons-PD-4.raw.PG.NrOfStrippedSequencesUsedForQuantification	N: -Log Student's T-test p-value PD_HC	N: Student's T-test q-value PD_HC	N: Student's T-test Difference PD_HC	N: Student's T-test Test statistic PD_HC	T: PG.ProteinGroups	T: PG.ProteinAccessions	T: PG.UniProtIds	T: PG.ProteinNames	T: PG.FastaHeaders
SEMA5B	Semaphorin-5B	4099.39	12.0012	+	0.298723	0.584131	0.584452	0.654317	12.4876	12.5957	12.5752	12.6283	1.23006	1.49914	1.49947	1.57387	5743.04	6189.9	6102.56	6331.36	1.4993	6146.23	4099.39	+	PD_HC	anatomical structure development;cell differentiation;cellular developmental process;cellular process;developmental process;nervous system development;system development	receptor activity	cell part;integral to membrane;intrinsic to membrane;membrane part	Axon guidance		REACT_264269	1	1	1	1	1	1	1	1	11.0936	0	12.0413	42.3231	Q9P283	Q9P283	Q9P283	SEM5B_HUMAN	>sp|Q9P283|SEM5B_HUMAN Semaphorin-5B OS=Homo sapiens OX=9606 GN=SEMA5B PE=2 SV=4
CCL2	C-C motif chemokine 2	3265.39	11.673	+	0.358312	0.587814	0.545493	0.526698	12.3566	12.1026	12.3084	12.0572	1.28193	1.50297	1.45952	1.44063	5244.54	4397.9	5072.21	4261.66	1.45007	4735.06	3265.39	+	PD_HC	aging;anatomical structure formation involved in morphogenesis;anatomical structure morphogenesis;angiogenesis;astrocyte cell migration;biological adhesion;biological regulation;calcium ion homeostasis;cation homeostasis;cell adhesion;cell chemotaxis;cell communication;cell migration;cell motility;cell surface receptor linked signaling pathway;cellular calcium ion homeostasis;cellular cation home…	binding;carbohydrate binding;catalytic activity;CCR chemokine receptor binding;CCR2 chemokine receptor binding;chemokine activity;chemokine receptor binding;cytokine activity;cytokine receptor binding;glycosaminoglycan binding;G-protein-coupled receptor binding;heparin binding;kinase activity;pattern binding;phosphotransferase activity, alcohol group as acceptor;polysaccharide binding;protein bin…	axon;axon part;axon terminus;cell part;cell projection;cell projection part;C-fiber;cytoplasmic membrane-bounded vesicle;cytoplasmic part;cytoplasmic vesicle;dendrite;endocytic vesicle;endoplasmic reticulum;extracellular region;extracellular region part;extracellular space;intracellular membrane-bounded organelle;intracellular organelle;intracellular part;membrane-bounded organelle;membrane-bound…	Chagas disease (American trypanosomiasis);Chemokine signaling pathway;Cytokine-cytokine receptor interaction;Malaria;NOD-like receptor signaling pathway;Rheumatoid arthritis		REACT_15344;REACT_18355	1	1	1	1	1	1	1	1	10.8649	0	11.7016	40.3972	P13500	P13500	P13500	CCL2_HUMAN	>sp|P13500|CCL2_HUMAN C-C motif chemokine 2 OS=Homo sapiens OX=9606 GN=CCL2 PE=1 SV=1
MAP2K7	Dual specificity mitogen-activated protein kinase kinase 7	2888.95	11.4963	+	0.291806	8.44303	0.59323	0.672364	12.2637	11.717	12.3651	11.9819	1.22417	348.021	1.50862	1.59368	4917.47	3366.42	5275.53	4044.93	1.55115	4481.2	2888.95	+	PD_HC	activation of immune response;activation of innate immune response;activation of JUN kinase activity;activation of MAPK activity;apoptosis;biological regulation;cell death;cellular macromolecule metabolic process;cellular metabolic process;cellular process;cellular protein metabolic process;cellular response to stimulus;cellular response to stress;death;defense response;immune response;immune res…	adenyl nucleotide binding;adenyl ribonucleotide binding;ATP binding;binding;catalytic activity;cation binding;enzyme binding;ion binding;JUN kinase kinase activity;kinase activity;kinase binding;magnesium ion binding;MAP kinase kinase activity;metal ion binding;nucleotide binding;phosphatase binding;phosphotransferase activity, alcohol group as acceptor;protein binding;protein kinase activity;pro…	cell part;cytoplasm;cytoplasmic part;cytosol;intracellular;intracellular membrane-bounded organelle;intracellular organelle;intracellular part;membrane-bounded organelle;nucleus;organelle	ErbB signaling pathway;Fc epsilon RI signaling pathway;GnRH signaling pathway;MAPK signaling pathway;Neurotrophin signaling pathway;Osteoclast differentiation;Protein processing in endoplasmic reticulum;T cell receptor signaling pathway;Toll-like receptor signaling pathway		REACT_163701;REACT_169436;REACT_21368;REACT_264618	1	1	1	1	1	1	1	1	2.53151	0.000328502	9.58183	4.37916	O14733	O14733	O14733	MP2K7_HUMAN	>sp|O14733|MP2K7_HUMAN Dual specificity mitogen-activated protein kinase kinase 7 OS=Homo sapiens OX=9606 GN=MAP2K7 PE=1 SV=2
GDA	Guanine deaminase	1650.79	10.6889	+	6.8198	0.539298	0.533999	0.72886	10.4286	11.5983	11.7266	10.9904	112.97	1.45327	1.44794	1.65733	1378.23	3100.53	3388.9	2034.42	1.5553	2567.47	1650.79	+	PD_HC	anatomical structure development;catabolic process;cellular aromatic compound metabolic process;cellular catabolic process;cellular metabolic process;cellular nitrogen compound catabolic process;cellular nitrogen compound metabolic process;cellular process;developmental process;guanine catabolic process;guanine metabolic process;heterocycle catabolic process;heterocycle metabolic process;metaboli…	binding;catalytic activity;cation binding;deaminase activity;guanine deaminase activity;hydrolase activity;hydrolase activity, acting on carbon-nitrogen (but not peptide) bonds;hydrolase activity, acting on carbon-nitrogen (but not peptide) bonds, in cyclic amidines;ion binding;metal ion binding;transition metal ion binding;zinc ion binding	cell part;cytoplasmic part;cytosol;extracellular membrane-bounded organelle;extracellular organelle;extracellular region part;extracellular vesicular exosome;intracellular;intracellular part;membrane-bounded organelle;membrane-bounded vesicle;organelle;vesicle	Purine metabolism		REACT_2086	1	1	1	1	1	1	1	1	2.90006	0.000523077	9.03051	5.06211	Q9Y2T3	Q9Y2T3	Q9Y2T3	GUAD_HUMAN	>sp|Q9Y2T3|GUAD_HUMAN Guanine deaminase OS=Homo sapiens OX=9606 GN=GDA PE=1 SV=1
PTX3	Pentraxin-related protein PTX3	1369.69	10.4196	+	0.288628	6.28426	0.683681	0.61905	11.3097	10.8749	11.1256	11.015	1.22148	77.9383	1.60623	1.53586	2538.39	1877.89	2234.29	2069.4	1.57105	2151.85	1369.69	+	PD_HC	biological regulation;defense response;immune effector process;immune response;immune system process;inflammatory response;innate immune response;multi-organism process;negative regulation of biological process;negative regulation of reproductive process;negative regulation of viral reproduction;negative regulation of virion penetration into host cell;opsonization;positive regulation of biologica…	1,3-beta-D-glucan binding;binding;carbohydrate binding;complement binding;complement component C1q binding;opsonin binding;pattern binding;polysaccharide binding;protein binding;virion binding	extracellular region;extracellular region part;extracellular space				1	1	1	1	1	1	1	1	3.13141	0.000708333	9.1124	5.54292	P26022	P26022	P26022	PTX3_HUMAN	>sp|P26022|PTX3_HUMAN Pentraxin-related protein PTX3 OS=Homo sapiens OX=9606 GN=PTX3 PE=1 SV=3
GPC3	Glypican-3	707.713	9.46702	+	10.1753	0.222792	0.21152	0.361358	9.90331	10.2248	9.60256	9.3604	1156.3	1.16699	1.15791	1.28463	957.62	1196.66	777.425	657.296	1.22581	867.523	707.713	+	PD_HC	amine metabolic process;aminoglycan biosynthetic process;aminoglycan catabolic process;aminoglycan metabolic process;anatomical structure development;anatomical structure morphogenesis;anterior/posterior axis specification;appendage morphogenesis;axis specification;biological regulation;biomineral tissue development;biosynthetic process;blood vessel development;body morphogenesis;bone mineralizat…	enzyme inhibitor activity;enzyme regulator activity;peptidase inhibitor activity;peptidase regulator activity;peptidyl-dipeptidase inhibitor activity	anchored to membrane;anchored to plasma membrane;cell part;cytoplasmic part;extracellular matrix;extracellular membrane-bounded organelle;extracellular organelle;extracellular region part;extracellular space;extracellular vesicular exosome;Golgi apparatus part;Golgi lumen;integral to membrane;integral to plasma membrane;intracellular organelle lumen;intracellular organelle part;intracellular part…			REACT_120752;REACT_121248;REACT_121408;REACT_24968;REACT_267741;REACT_267942;REACT_268678;REACT_268749	1	1	1	1	1	1	1	1	1.52303	0.00196286	7.03002	2.61844	P51654	P51654	P51654	GPC3_HUMAN	>sp|P51654|GPC3_HUMAN Glypican-3 OS=Homo sapiens OX=9606 GN=GPC3 PE=1 SV=1
PLEKHA7	Pleckstrin homology domain-containing family A member 7	647.873	9.33957	+	0.736932	1.18321	0.988787	7.51798	10.3634	10.3678	10.4874	10.6145	1.66663	2.27081	1.98452	183.289	1317.33	1321.35	1435.56	1567.77	2.12767	1378.46	647.873	+	PD_HC	biological adhesion;cell adhesion;cell junction maintenance;cell junction organization;cell-cell adhesion;cell-cell junction maintenance;cell-cell junction organization;cellular component maintenance;cellular component maintenance at cellular level;cellular component organization;cellular component organization at cellular level;cellular component organization or biogenesis;cellular component org…	binding;delta-catenin binding;protein binding	adherens junction;anchoring junction;cell junction;cell part;cell-cell adherens junction;cell-cell junction;centrosome;cytoplasm;cytoplasmic part;cytoskeletal part;extracellular membrane-bounded organelle;extracellular organelle;extracellular region part;extracellular vesicular exosome;intracellular membrane-bounded organelle;intracellular non-membrane-bounded organelle;intracellular organelle;in…				1	1	1	1	1	1	1	1	2.51631	0.000306306	7.85158	4.26552	Q6IQ23	Q6IQ23	Q6IQ23	PKHA7_HUMAN	>sp|Q6IQ23|PKHA7_HUMAN Pleckstrin homology domain-containing family A member 7 OS=Homo sapiens OX=9606 GN=PLEKHA7 PE=1 SV=2
MMRN1	Multimerin-1	546.35	9.09368	+	0.372082	0.45293	0.437134	0.736312	11.2615	9.32664	9.72361	9.31542	1.29422	1.36882	1.35391	1.66591	2454.99	642.094	845.47	637.119	1.36136	743.782	546.35	+	PD_HC	biological adhesion;biological regulation;blood coagulation;cell activation;cell adhesion;cellular process;coagulation;establishment of localization;establishment of localization in cell;exocytosis;hemostasis;multicellular organismal process;platelet activation;platelet degranulation;regulation of biological quality;regulation of body fluid levels;secretion;secretion by cell;transport;vesicle-med…		cell part;cytoplasmic membrane-bounded vesicle lumen;cytoplasmic part;cytoplasmic vesicle part;extracellular region;intracellular organelle part;intracellular part;membrane-enclosed lumen;organelle lumen;organelle part;platelet alpha granule lumen;secretory granule lumen;vesicle lumen			REACT_318	1	1	1	1	1	1	1	1	6.0043	0	9.40717	14.0731	Q13201	Q13201	Q13201	MMRN1_HUMAN	>sp|Q13201|MMRN1_HUMAN Multimerin-1 OS=Homo sapiens OX=9606 GN=MMRN1 PE=1 SV=3
ATRX	Transcriptional regulator ATRX	334.554	8.3861	+	0.286465	0.97899	8.73781	0.788608	9.23538	9.58194	9.30973	8.59353	1.21965	1.97109	426.916	1.72741	602.735	766.393	634.612	386.287	1.84925	618.673	334.554	+	PD_HC	anatomical structure development;biological regulation;biosynthetic process;cell development;cellular biosynthetic process;cellular component assembly;cellular component assembly at cellular level;cellular component organization;cellular component organization at cellular level;cellular component organization or biogenesis;cellular component organization or biogenesis at cellular level;cellular d…	adenyl nucleotide binding;adenyl ribonucleotide binding;ATP binding;ATPase activity;ATPase activity, coupled;binding;catalytic activity;cation binding;chromatin binding;chromo shadow domain binding;DNA binding;DNA helicase activity;DNA translocase activity;DNA-dependent ATPase activity;helicase activity;histone binding;hydrolase activity;hydrolase activity, acting on acid anhydrides;hydrolase act…	cell part;chromatin;chromatin remodeling complex;chromosomal part;heterochromatin;intracellular membrane-bounded organelle;intracellular organelle;intracellular organelle part;intracellular part;macromolecular complex;membrane-bounded organelle;nuclear body;nuclear chromatin;nuclear chromosome part;nuclear heterochromatin;nuclear part;nucleoplasm;nucleoplasm part;nucleus;organelle;organelle part;…		ATRX-DAXX complex		1	1	1	1	1	1	1	1	1.72728	0.00166887	6.48218	2.9076	P46100	P46100	P46100	ATRX_HUMAN	>sp|P46100|ATRX_HUMAN Transcriptional regulator ATRX OS=Homo sapiens OX=9606 GN=ATRX PE=1 SV=6
CRB2	Protein crumbs homolog 2	328.868	8.36137	+	8.61179	5.63329	5.56673	5.63997	13.6264	13.9993	14.0159	13.9967	391.207	49.6351	47.3972	49.8655	12646.1	16376.1	16565.6	16346.6	49.7503	16361.3	328.868	+	PD_HC	anatomical structure development;anatomical structure formation involved in morphogenesis;anterior/posterior pattern specification;biological regulation;cardiovascular system development;cellular process;developmental process;establishment or maintenance of apical/basal cell polarity;establishment or maintenance of bipolar cell polarity;establishment or maintenance of cell polarity;establishment …	binding;calcium ion binding;cation binding;enzyme binding;ion binding;metal ion binding;protein binding	cell part;extracellular membrane-bounded organelle;extracellular organelle;extracellular region part;extracellular vesicular exosome;integral to membrane;intrinsic to membrane;macromolecular complex;membrane;membrane part;membrane raft;membrane-bounded organelle;membrane-bounded vesicle;organelle;plasma membrane;protein complex;vesicle				4	4	4	4	4	4	4	4	4.23368	0.00194286	7.54664	7.89622	Q5IJ48	Q5IJ48	Q5IJ48	CRUM2_HUMAN	>sp|Q5IJ48|CRUM2_HUMAN Protein crumbs homolog 2 OS=Homo sapiens OX=9606 GN=CRB2 PE=1 SV=2
PRODH	Proline dehydrogenase 1, mitochondrial	209.289	7.70935	+	0.383222	6.8446	0.340081	0.688033	8.38333	7.98975	8.31141	8.19216	1.30425	114.929	1.26583	1.61109	333.913	254.188	317.675	292.473	1.45767	305.074	209.289	+	PD_HC	4-hydroxyproline catabolic process;4-hydroxyproline metabolic process;amine catabolic process;amine metabolic process;biological regulation;carboxylic acid catabolic process;carboxylic acid metabolic process;catabolic process;cellular amine metabolic process;cellular amino acid catabolic process;cellular amino acid metabolic process;cellular catabolic process;cellular ketone metabolic process;cel…	binding;catalytic activity;coenzyme binding;cofactor binding;FAD binding;flavin adenine dinucleotide binding;oxidoreductase activity;oxidoreductase activity, acting on the CH-NH group of donors;proline dehydrogenase activity	cell part;cytoplasmic part;intracellular organelle lumen;intracellular organelle part;intracellular part;membrane;membrane-enclosed lumen;mitochondrial inner membrane;mitochondrial matrix;mitochondrial membrane;mitochondrial part;organelle inner membrane;organelle lumen;organelle membrane;organelle part	Arginine and proline metabolism		REACT_1002	1	1	1	1	1	1	1	1	2.07386	0.000997602	6.15518	3.42385	O43272	O43272	O43272	PROD_HUMAN	>sp|O43272|PROD_HUMAN Proline dehydrogenase 1, mitochondrial OS=Homo sapiens OX=9606 GN=PRODH PE=1 SV=3
CELSR1	Cadherin EGF LAG seven-pass G-type receptor 1	157.248	7.2969	+	13.5706	7.22389	9.37288	7.00512	16.1861	15.8889	15.768	16.0337	12166.3	149.488	663.007	128.455	74559.3	60678.6	55800.9	67084.9	406.248	63881.7	157.248	+	PD_HC	anatomical structure development;anatomical structure formation involved in morphogenesis;anatomical structure morphogenesis;anterior/posterior pattern specification;apical protein localization;asymmetric protein localization;behavior;biological adhesion;biological regulation;cell adhesion;cell migration;cell motility;cell surface receptor linked signaling pathway;cell-cell adhesion;cellular comp…	binding;calcium ion binding;cation binding;G-protein coupled receptor activity;ion binding;metal ion binding;molecular transducer activity;protein binding;protein dimerization activity;receptor activity;signal transducer activity;signaling receptor activity;transmembrane signaling receptor activity	cell part;integral to membrane;integral to plasma membrane;intracellular organelle part;intracellular part;intrinsic to membrane;intrinsic to plasma membrane;membrane;membrane part;nuclear part;nucleoplasm;organelle part;plasma membrane;plasma membrane part				4	4	4	4	4	4	4	4	2.32942	0.000778157	6.67606	3.86956	Q9NYQ6	Q9NYQ6	Q9NYQ6	CELR1_HUMAN	>sp|Q9NYQ6|CELR1_HUMAN Cadherin EGF LAG seven-pass G-type receptor 1 OS=Homo sapiens OX=9606 GN=CELSR1 PE=1 SV=1
PLEKHG4B	Pleckstrin homology domain-containing family G member 4B	154.699	7.27332	+	5.27626	5.86408	8.31379	2.97518	12.7704	12.1356	13.1189	12.9692	38.7536	58.2457	318.2	7.86355	6986.72	4499.66	8895.75	8018.96	48.4997	7502.84	154.699	+	PD_HC		enzyme regulator activity;GTPase regulator activity;guanyl-nucleotide exchange factor activity;nucleoside-triphosphatase regulator activity;Ras guanyl-nucleotide exchange factor activity;Rho guanyl-nucleotide exchange factor activity;small GTPase regulator activity					3	3	3	3	3	3	3	3	3.16001	0.000673267	7.14122	5.41952	Q96PX9	Q96PX9	Q96PX9	PKH4B_HUMAN	>sp|Q96PX9|PKH4B_HUMAN Pleckstrin homology domain-containing family G member 4B OS=Homo sapiens OX=9606 GN=PLEKHG4B PE=1 SV=4
CPNE4	Copine-4	132.817	7.0533	+	10.4095	7.56995	7.78108	10.0768	16.7785	16.4499	16.2308	16.3432	1360.1	190.012	219.957	1079.99	112417	89518.6	76905.5	83136.8	649.973	86327.7	132.817	+	PD_HC			extracellular membrane-bounded organelle;extracellular organelle;extracellular region part;extracellular vesicular exosome;membrane-bounded organelle;membrane-bounded vesicle;organelle;vesicle				5	5	5	5	5	5	5	5	4.21831	0.00183784	7.49128	7.84545	Q96A23	Q96A23	Q96A23	CPNE4_HUMAN	>sp|Q96A23|CPNE4_HUMAN Copine-4 OS=Homo sapiens OX=9606 GN=CPNE4 PE=1 SV=1
NOTCH1	Neurogenic locus notch homolog protein 1	107.742	6.75143	+	7.18453	0.751934	0.688392	3.3196	9.18932	9.23072	9.46617	9.35828	145.465	1.68405	1.61149	9.98388	583.796	600.791	707.296	656.331	5.83396	628.561	107.742	+	PD_HC	anatomical structure development;anatomical structure formation involved in morphogenesis;anatomical structure morphogenesis;angiogenesis;anterior/posterior pattern specification;aortic valve morphogenesis;appendage morphogenesis;arterial endothelial cell differentiation;artery morphogenesis;astrocyte differentiation;atrioventricular node development;atrioventricular valve morphogenesis;auditory …	binding;calcium ion binding;cation binding;chromatin binding;chromatin DNA binding;core promoter binding;DNA binding;enzyme binding;enzyme inhibitor activity;enzyme regulator activity;ion binding;metal ion binding;nucleic acid binding;nucleic acid binding transcription factor activity;protein binding;protein binding transcription factor activity;receptor activity;regulatory region DNA binding;reg…	acrosomal vesicle;cell part;cell surface;cytoplasmic membrane-bounded vesicle;cytoplasmic part;cytoplasmic vesicle;cytosol;endoplasmic reticulum membrane;endoplasmic reticulum part;extracellular region;Golgi apparatus part;Golgi membrane;integral to membrane;intracellular membrane-bounded organelle;intracellular organelle;intracellular organelle part;intracellular part;intrinsic to membrane;macro…	Dorso-ventral axis formation;Notch signaling pathway	HES1 promoter-Notch enhancer complex;MAML1-RBP-Jkappa-Notch1 complex;MAML2-RBP-Jkappa-Notch1 complex;MAML3-RBP-Jkappa-Notch1 complex;Notch1-fraction 30 complex;Notch1-p56lck-PI3K complex;RBP-Jkappa-Notch1 complex;RBPJ-NotchIC-Mastermind complex;YY1-Notch1 complex;YY1-Notch1-RBP-Jkappa complex	REACT_118568;REACT_118614;REACT_118722;REACT_118780;REACT_118798;REACT_13673;REACT_14835;REACT_160089;REACT_160106;REACT_160243;REACT_160254;REACT_160305	2	2	2	2	2	2	2	2	2.2145	0.000651429	6.32501	3.65805	P46531	P46531	P46531	NOTC1_HUMAN	>sp|P46531|NOTC1_HUMAN Neurogenic locus notch homolog protein 1 OS=Homo sapiens OX=9606 GN=NOTCH1 PE=1 SV=4
ITGB8	Integrin beta-8	94.2694	6.55872	+	10.2692	9.94021	10.8939	8.60709	16.7097	16.682	16.6635	16.6004	1234.06	982.429	1902.79	389.935	107182	105143	103804	99361.5	1108.25	104474	94.2694	+	PD_HC	anatomical structure development;biological adhesion;biological regulation;blood vessel development;cartilage development;cell adhesion;cell surface receptor linked signaling pathway;cellular component organization;cellular component organization at cellular level;cellular component organization or biogenesis;cellular component organization or biogenesis at cellular level;cellular lipid metabolic…	receptor activity	alphav-beta8 integrin complex;cell part;cell surface;extracellular membrane-bounded organelle;extracellular organelle;extracellular region part;extracellular vesicular exosome;integrin complex;macromolecular complex;membrane;membrane part;membrane-bounded organelle;membrane-bounded vesicle;organelle;plasma membrane;plasma membrane part;protein complex;receptor complex;vesicle	Arrhythmogenic right ventricular cardiomyopathy (ARVC);Cell adhesion molecules (CAMs);Dilated cardiomyopathy;ECM-receptor interaction;Focal adhesion;Hypertrophic cardiomyopathy (HCM);Regulation of actin cytoskeleton	ITGAV-ITGB8-MMP14-TGFB1 complex	REACT_13552;REACT_150331	19	19	19	19	19	19	19	19	5.0716	0	6.73631	9.86119	P26012	P26012	P26012	ITB8_HUMAN	>sp|P26012|ITB8_HUMAN Integrin beta-8 OS=Homo sapiens OX=9606 GN=ITGB8 PE=1 SV=1
WRAP53	Telomerase Cajal body protein 1	76.3592	6.25473	+	0.329126	0.983261	0.450318	0.771383	0.148142	6.52864	7.50225	7.15326	1.25625	1.97693	1.36634	1.70691	1.10814	92.3244	181.302	142.346	1.53662	117.335	76.3592	+	PD_HC	biological regulation;cellular component assembly;cellular component assembly at cellular level;cellular component organization;cellular component organization at cellular level;cellular component organization or biogenesis;cellular component organization or biogenesis at cellular level;cellular macromolecule metabolic process;cellular metabolic process;cellular nitrogen compound metabolic proces…	binding;nucleic acid binding;RNA binding	Cajal body;cell part;cytoplasm;intracellular membrane-bounded organelle;intracellular organelle;intracellular organelle part;intracellular part;macromolecular complex;membrane-bounded organelle;nuclear body;nuclear part;nucleoplasm;nucleoplasm part;nucleus;organelle;organelle part;ribonucleoprotein complex;telomerase holoenzyme complex			REACT_7974	1	1	1	1	1	1	1	1	1.44364	0.00268729	4.69955	2.41449	Q9BUR4	Q9BUR4	Q9BUR4	TCAB1_HUMAN	>sp|Q9BUR4|TCAB1_HUMAN Telomerase Cajal body protein 1 OS=Homo sapiens OX=9606 GN=WRAP53 PE=1 SV=1
PRSS56	Serine protease 56	51.5701	5.68846	+	11.1449	8.22306	10.7599	10.12	16.1668	16.1604	16.4358	15.6564	2264.38	298.805	1734.01	1112.82	73568.5	73242.8	88648	51647.1	1423.42	73405.7	51.5701	+	PD_HC	anatomical structure development;camera-type eye development;developmental process;eye development;macromolecule metabolic process;metabolic process;organ development;primary metabolic process;protein metabolic process;proteolysis;sensory organ development	catalytic activity;endopeptidase activity;hydrolase activity;peptidase activity;peptidase activity, acting on L-amino acid peptides;serine hydrolase activity;serine-type endopeptidase activity;serine-type peptidase activity	cell part;cytoplasmic part;endoplasmic reticulum;intracellular membrane-bounded organelle;intracellular organelle;intracellular part;membrane-bounded organelle;organelle				11	11	11	11	11	11	11	11	3.98852	0.00133333	6.0429	6.95809	P0CW18	P0CW18	P0CW18	PRS56_HUMAN	>sp|P0CW18|PRS56_HUMAN Serine protease 56 OS=Homo sapiens OX=9606 GN=PRSS56 PE=1 SV=1
GDPD2	Glycerophosphoinositol inositolphosphodiesterase GDPD2	37.0611	5.21184	+	12.8176	13.3092	13.2371	6.42288	18.3193	18.1864	18.3233	18.0857	7219.08	10150.1	9655.26	85.7985	327084	298299	327992	278188	8437.17	312691	37.0611	+	PD_HC	alcohol metabolic process;alditol metabolic process;carbohydrate metabolic process;cellular carbohydrate metabolic process;cellular metabolic process;cellular process;glycerol metabolic process;lipid metabolic process;metabolic process;polyol metabolic process;primary metabolic process;small molecule metabolic process	binding;catalytic activity;cation binding;glycerophosphodiester phosphodiesterase activity;glycerophosphoinositol inositolphosphodiesterase activity;hydrolase activity;hydrolase activity, acting on ester bonds;ion binding;metal ion binding;phosphoric diester hydrolase activity;phosphoric ester hydrolase activity	cell part;cytoplasm;cytoskeleton;integral to membrane;intracellular non-membrane-bounded organelle;intracellular organelle;intracellular part;intrinsic to membrane;membrane;membrane part;non-membrane-bounded organelle;organelle;plasma membrane				6	6	6	6	6	6	6	6	2.16688	0.000793388	6.782	3.60921	Q9HCC8	Q9HCC8	Q9HCC8	GDPD2_HUMAN	>sp|Q9HCC8|GDPD2_HUMAN Glycerophosphoinositol inositolphosphodiesterase GDPD2 OS=Homo sapiens OX=9606 GN=GDPD2 PE=2 SV=1
C4A	Complement C4-A	33.4753	5.06503	+	0.0373343	9.49758	0.46436	9.67535	13.5034	13.57	13.6479	13.5607	1.02622	722.864	1.37971	817.656	11612.6	12161.2	12835.9	12083.1	362.122	12122.1	33.4753	+	PD_HC	activation of immune response;biological regulation;complement activation;complement activation, classical pathway;defense response;humoral immune response;immune effector process;immune response;immune system process;inflammatory response;innate immune response;macromolecule metabolic process;metabolic process;positive regulation of apoptotic cell clearance;positive regulation of biological proc…	binding;complement binding;complement component C1q binding;endopeptidase inhibitor activity;endopeptidase regulator activity;enzyme inhibitor activity;enzyme regulator activity;opsonin binding;peptidase inhibitor activity;peptidase regulator activity;protein binding	blood microparticle;cell part;extracellular membrane-bounded organelle;extracellular organelle;extracellular region;extracellular region part;extracellular vesicular exosome;membrane;membrane-bounded organelle;membrane-bounded vesicle;organelle;plasma membrane;vesicle	Complement and coagulation cascades;Staphylococcus aureus infection;Systemic lupus erythematosus		REACT_118707;REACT_7972;REACT_8024	1	1	1	1	1	1	1	1	1.73498	0.00145329	8.65183	2.98671	P0C0L4	P0C0L4	P0C0L4	CO4A_HUMAN	>sp|P0C0L4|CO4A_HUMAN Complement C4-A OS=Homo sapiens OX=9606 GN=C4A PE=1 SV=2
CLEC18A;CLEC18B;CLEC18C	C-type lectin domain family 18 member A;C-type lectin domain family 18 member B;C-type lectin domain family 18 member C	31.8669	4.99399	+	8.32297	8.36246	9.86524	8.73651	13.6001	13.3389	13.5187	13.5915	320.231	329.118	932.681	426.532	12417.6	10361.2	11736.4	12343.8	377.825	12040.1	31.8669	+	PD_HC		binding;carbohydrate binding	extracellular region				6	6	6	6	6	6	6	6	4.86397	0.00242857	4.6905	8.29967	A5D8T8;Q6UXF7;Q8NCF0	A5D8T8;Q6UXF7;Q8NCF0	A5D8T8;Q6UXF7;Q8NCF0	CL18A_HUMAN;CL18B_HUMAN;CL18C_HUMAN	>sp|A5D8T8|CL18A_HUMAN C-type lectin domain family 18 member A OS=Homo sapiens OX=9606 GN=CLEC18A PE=1 SV=3;>sp|Q6UXF7|CL18B_HUMAN C-type lectin domain family 18 member B OS=Homo sapiens OX=9606 GN=CLEC18B PE=2 SV=2;>sp|Q8NCF0|CL18C_HUMAN C-type lectin domain family 18 member C OS=Homo sapiens OX=9606 GN=CLEC18C PE=2 SV=2
SIPA1L1	Signal-induced proliferation-associated 1-like protein 1	28.4297	4.82933	+	7.29429	2.99586	8.48715	5.82012	11.5208	11.7239	11.5727	11.5616	156.964	7.97708	358.828	56.4977	2938.37	3382.56	3046	3022.65	106.731	3034.33	28.4297	+	PD_HC	actin cytoskeleton organization;actin cytoskeleton reorganization;actin filament-based process;biological regulation;cell surface receptor linked signaling pathway;cellular component organization;cellular component organization at cellular level;cellular component organization or biogenesis;cellular component organization or biogenesis at cellular level;cellular process;cellular response to stimu…	enzyme activator activity;enzyme regulator activity;GTPase activator activity;GTPase regulator activity;nucleoside-triphosphatase regulator activity	cell junction;cell part;cell projection;cell projection part;cytoplasm;cytoskeletal part;cytoskeleton;dendritic spine;intracellular non-membrane-bounded organelle;intracellular organelle;intracellular organelle part;intracellular part;membrane;neuron projection;neuron spine;non-membrane-bounded organelle;organelle;organelle part;postsynaptic density;postsynaptic membrane;synapse part;synaptic mem…				2	2	2	2	2	2	2	2	2.43045	0.000618705	5.44541	3.93149	O43166	O43166	O43166	SI1L1_HUMAN	>sp|O43166|SI1L1_HUMAN Signal-induced proliferation-associated 1-like protein 1 OS=Homo sapiens OX=9606 GN=SIPA1L1 PE=1 SV=4
GSTT1	Glutathione S-transferase theta-1	27.4344	4.77791	+	11.5988	7.24978	9.05049	8.42781	13.5673	13.5333	13.6145	13.3332	3101.61	152.195	530.236	344.369	12138.5	11855.8	12542.2	10320.3	437.302	11997.1	27.4344	+	PD_HC	amine metabolic process;carboxylic acid metabolic process;cellular amine metabolic process;cellular amino acid metabolic process;cellular ketone metabolic process;cellular metabolic process;cellular modified amino acid metabolic process;cellular nitrogen compound metabolic process;cellular process;glutathione metabolic process;metabolic process;nitrogen compound metabolic process;organic acid met…	antioxidant activity;catalytic activity;glutathione peroxidase activity;glutathione transferase activity;oxidoreductase activity;oxidoreductase activity, acting on peroxide as acceptor;peroxidase activity;transferase activity;transferase activity, transferring alkyl or aryl (other than methyl) groups	cell part;cytoplasmic part;cytosol;extracellular membrane-bounded organelle;extracellular organelle;extracellular region part;extracellular vesicular exosome;intracellular part;membrane-bounded organelle;membrane-bounded vesicle;organelle;vesicle	Drug metabolism - cytochrome P450;Glutathione metabolism;Metabolism of xenobiotics by cytochrome P450		REACT_6926	6	6	6	6	6	6	6	6	2.52866	0.000625455	4.43032	3.9541	P30711	P30711	P30711	GSTT1_HUMAN	>sp|P30711|GSTT1_HUMAN Glutathione S-transferase theta-1 OS=Homo sapiens OX=9606 GN=GSTT1 PE=1 SV=4
LRRC15	Leucine-rich repeat-containing protein 15	27.0529	4.75771	+	13.0029	7.83386	11.0085	11.4556	16.3053	15.707	16.1622	15.8331	8208.48	228.153	2060.1	2808.53	80981.2	53490.7	73334.3	58376.5	2434.32	65855.4	27.0529	+	PD_HC	biological regulation;negative regulation of biological process;negative regulation of cellular component organization;negative regulation of cellular process;negative regulation of establishment of protein localization in plasma membrane;positive regulation of biological process;positive regulation of cell migration;positive regulation of cell motility;positive regulation of cellular component m…	binding;collagen binding;extracellular matrix binding;fibronectin binding;laminin binding;protein binding	cell part;extracellular membrane-bounded organelle;extracellular organelle;extracellular region part;extracellular vesicular exosome;integral to membrane;intrinsic to membrane;membrane part;membrane-bounded organelle;membrane-bounded vesicle;organelle;vesicle				7	7	7	7	7	7	7	7	2.49293	0.000651515	5.17668	4.00141	Q8TF66	Q8TF66	Q8TF66	LRC15_HUMAN	>sp|Q8TF66|LRC15_HUMAN Leucine-rich repeat-containing protein 15 OS=Homo sapiens OX=9606 GN=LRRC15 PE=2 SV=2
GFAP	Glial fibrillary acidic protein	25.8854	4.69406	+	16.569	16.3636	16.6478	17.3815	21.2843	21.3057	21.4845	21.3003	97222.3	84320.7	102680	170747	2.55395e+06	2.59212e+06	2.93413e+06	2.58243e+06	99951.3	2.58728e+06	25.8854	+	PD_HC	anatomical structure development;anatomical structure morphogenesis;astrocyte development;astrocyte differentiation;Bergmann glial cell differentiation;biological regulation;cell development;cell differentiation;cell part morphogenesis;cell projection morphogenesis;cell projection organization;cellular component morphogenesis;cellular component organization;cellular component organization at cell…	structural constituent of cytoskeleton;structural molecule activity	cell body;cell part;cytoplasm;cytoplasmic part;cytoskeletal part;cytosol;intermediate filament;intracellular organelle part;intracellular part;macromolecular complex;membrane;organelle part;protein complex			REACT_116022	45	45	45	45	45	45	45	45	6.03079	0	4.60324	10.7834	P14136	P14136	P14136	GFAP_HUMAN	>sp|P14136|GFAP_HUMAN Glial fibrillary acidic protein OS=Homo sapiens OX=9606 GN=GFAP PE=1 SV=1
DENND4C	DENN domain-containing protein 4C	24.887	4.63732	+	0.335637	0.587013	0.465198	0.55707	0.40256	6.12206	6.27751	0.341408	1.26193	1.50213	1.38051	1.47128	1.32185	69.6504	77.5745	1.26699	1.42589	35.4861	24.887	+	PD_HC	biological regulation;cellular component organization;cellular component organization or biogenesis;cellular localization;cellular macromolecule localization;cellular membrane organization;cellular process;cellular protein localization;cellular response to chemical stimulus;cellular response to endogenous stimulus;cellular response to hormone stimulus;cellular response to insulin stimulus;cellula…	enzyme regulator activity;GTPase regulator activity;guanyl-nucleotide exchange factor activity;nucleoside-triphosphatase regulator activity;Rab guanyl-nucleotide exchange factor activity;Ras guanyl-nucleotide exchange factor activity;small GTPase regulator activity	cell part;cytoplasmic membrane-bounded vesicle;cytoplasmic part;cytoplasmic vesicle;cytoplasmic vesicle membrane;cytoplasmic vesicle part;cytosol;insulin-responsive compartment;intracellular membrane-bounded organelle;intracellular organelle;intracellular organelle part;intracellular part;membrane;membrane-bounded organelle;membrane-bounded vesicle;organelle;organelle membrane;organelle part;plas…				1	1	1	1	1	1	1	1	0.831502	0.0217958	2.79965	1.4863	Q5VZ89	Q5VZ89	Q5VZ89	DEN4C_HUMAN	>sp|Q5VZ89|DEN4C_HUMAN DENN domain-containing protein 4C OS=Homo sapiens OX=9606 GN=DENND4C PE=1 SV=3
GALNT13	Polypeptide N-acetylgalactosaminyltransferase 13	22.7827	4.50987	+	0.216867	0.750339	0.356834	0.564839	0.107833	9.736	0.0486882	5.94951	1.16221	1.68219	1.28061	1.47922	1.07761	852.762	1.03432	61.7989	1.37992	31.4383	22.7827	+	PD_HC	carbohydrate metabolic process;cellular carbohydrate metabolic process;cellular macromolecule metabolic process;cellular metabolic process;cellular process;cellular protein metabolic process;glycosylation;macromolecule glycosylation;macromolecule metabolic process;macromolecule modification;metabolic process;O-glycan processing;post-translational protein modification;primary metabolic process;pro…	acetylgalactosaminyltransferase activity;binding;carbohydrate binding;catalytic activity;cation binding;ion binding;metal ion binding;polypeptide N-acetylgalactosaminyltransferase activity;transferase activity;transferase activity, transferring glycosyl groups;transferase activity, transferring hexosyl groups;UDP-glycosyltransferase activity	cell part;cytoplasmic part;Golgi apparatus part;Golgi membrane;integral to membrane;intracellular organelle part;intracellular part;intrinsic to membrane;membrane;membrane part;organelle membrane;organelle part	Mucin type O-Glycan biosynthesis		REACT_115606	1	1	1	1	1	0	1	1	0.716473	0.0302651	3.48829	1.35528	Q8IUC8	Q8IUC8	Q8IUC8	GLT13_HUMAN	>sp|Q8IUC8|GLT13_HUMAN Polypeptide N-acetylgalactosaminyltransferase 13 OS=Homo sapiens OX=9606 GN=GALNT13 PE=2 SV=2
ACBD7	Acyl-CoA-binding domain-containing protein 7	21.9651	4.45714	+	0.823298	10.0485	7.67747	0.763198	11.0862	11.3842	11.2054	10.7885	1.76945	1059.01	204.715	1.69725	2174.1	2672.92	2361.36	1768.73	103.242	2267.73	21.9651	+	PD_HC		binding;carboxylic acid binding;coenzyme binding;cofactor binding;fatty acid binding;fatty-acyl-CoA binding;lipid binding;monocarboxylic acid binding					2	2	2	2	2	2	2	2	1.41356	0.00267861	6.28793	2.43473	Q8N6N7	Q8N6N7	Q8N6N7	ACBD7_HUMAN	>sp|Q8N6N7|ACBD7_HUMAN Acyl-CoA-binding domain-containing protein 7 OS=Homo sapiens OX=9606 GN=ACBD7 PE=1 SV=1
ALG3	Dol-P-Man:Man(5)GlcNAc(2)-PP-Dol alpha-1,3-mannosyltransferase	19.8383	4.31021	+	9.86732	0.935653	6.71423	0.778533	10.0052	9.6439	10.6591	10.0944	934.027	1.91276	104.999	1.71539	1027.7	800.024	1617	1093.24	53.4558	1060.47	19.8383	+	PD_HC	biosynthetic process;carbohydrate biosynthetic process;carbohydrate metabolic process;cellular carbohydrate metabolic process;cellular macromolecule metabolic process;cellular metabolic process;cellular process;cellular protein metabolic process;dolichol-linked oligosaccharide biosynthetic process;glycosylation;macromolecule glycosylation;macromolecule metabolic process;macromolecule modification…	alpha-1,3-mannosyltransferase activity;catalytic activity;mannosyltransferase activity;transferase activity;transferase activity, transferring glycosyl groups;transferase activity, transferring hexosyl groups	cell part;cytoplasmic part;endoplasmic reticulum membrane;endoplasmic reticulum part;integral to membrane;intracellular organelle part;intracellular part;intrinsic to membrane;membrane;membrane part;organelle membrane;organelle part	N-Glycan biosynthesis;Various types of N-glycan biosynthesis		REACT_22433;REACT_268185	1	1	1	1	1	1	1	1	1.3063	0.00358925	5.52669	2.25541	Q92685	Q92685	Q92685	ALG3_HUMAN	>sp|Q92685|ALG3_HUMAN Dol-P-Man:Man(5)GlcNAc(2)-PP-Dol alpha-1,3-mannosyltransferase OS=Homo sapiens OX=9606 GN=ALG3 PE=1 SV=1
ECE2;EEF1AKMT4-ECE2	Endothelin-converting enzyme 2;EEF1AKMT4-ECE2 readthrough transcript protein	19.6888	4.2993	+	9.90865	8.04879	0.204108	8.80983	12.29	13.0031	13.5601	12.5117	961.171	264.806	1.15197	448.769	5007.93	8209.62	12078.1	5839.79	356.787	7024.7	19.6888	+	PD_HC							1	1	1	1	1	1	1	1	1.46839	0.0025573	6.09839	2.50893	P0DPD6;P0DPD8	P0DPD6;P0DPD8	P0DPD6;P0DPD8	ECE2_HUMAN;EFCE2_HUMAN	>sp|P0DPD6|ECE2_HUMAN Endothelin-converting enzyme 2 OS=Homo sapiens OX=9606 GN=ECE2 PE=1 SV=1;>sp|P0DPD8|EFCE2_HUMAN EEF1AKMT4-ECE2 readthrough transcript protein OS=Homo sapiens OX=9606 GN=EEF1AKMT4-ECE2 PE=1 SV=1
SLC39A9	Zinc transporter ZIP9	19.4506	4.28174	+	7.94582	2.27327	10.7765	0.61341	11.8072	12.6021	10.3512	8.24648	246.564	4.83418	1754.08	1.52987	3583.62	6217.42	1306.24	303.695	125.699	2444.93	19.4506	+	PD_HC	cation transport;divalent inorganic cation transport;divalent metal ion transport;establishment of localization;ion transport;metal ion transport;transition metal ion transport;transport;zinc ion transport	cation transmembrane transporter activity;ion transmembrane transporter activity;metal ion transmembrane transporter activity;substrate-specific transmembrane transporter activity;substrate-specific transporter activity;transmembrane transporter activity;transporter activity	cell part;integral to membrane;intrinsic to membrane;membrane part				1	1	1	1	1	1	1	1	1.08487	0.00769617	5.34949	1.93359	Q9NUM3	Q9NUM3	Q9NUM3	S39A9_HUMAN	>sp|Q9NUM3|S39A9_HUMAN Zinc transporter ZIP9 OS=Homo sapiens OX=9606 GN=SLC39A9 PE=1 SV=2
CP	Ceruloplasmin	19.1924	4.26247	+	14.5167	13.8126	13.9849	13.8917	18.2928	18.1163	18.1436	18.2572	23440.2	14388.2	16213.4	15199.1	321130	284151	289580	313303	15706.3	301441	19.1924	+	PD_HC	biological regulation;cation homeostasis;cation transport;cellular cation homeostasis;cellular chemical homeostasis;cellular homeostasis;cellular ion homeostasis;cellular iron ion homeostasis;cellular metal ion homeostasis;cellular process;chemical homeostasis;copper ion transport;establishment of localization;homeostatic process;ion homeostasis;ion transport;iron ion homeostasis;metal ion homeos…	binding;catalytic activity;cation binding;chaperone binding;copper ion binding;ferroxidase activity;ion binding;metal ion binding;oxidoreductase activity;oxidoreductase activity, oxidizing metal ions;oxidoreductase activity, oxidizing metal ions, oxygen as acceptor;protein binding;transition metal ion binding	blood microparticle;cell part;cytoplasmic part;extracellular membrane-bounded organelle;extracellular organelle;extracellular region;extracellular region part;extracellular space;extracellular vesicular exosome;intracellular organelle part;intracellular part;lysosomal membrane;membrane;membrane-bounded organelle;membrane-bounded vesicle;organelle;organelle membrane;organelle part;vacuolar membran…	Porphyrin and chlorophyll metabolism		REACT_20547;REACT_25060	32	32	32	32	32	32	32	32	6.59023	0	4.15099	11.3821	P00450	P00450	P00450	CERU_HUMAN	>sp|P00450|CERU_HUMAN Ceruloplasmin OS=Homo sapiens OX=9606 GN=CP PE=1 SV=1
LRP2	Low-density lipoprotein receptor-related protein 2	18.6281	4.21941	+	12.2047	10.1404	9.3319	10.6465	14.5968	14.6721	14.7289	14.3764	4720.42	1128.66	644.439	1602.93	24778.5	26106.1	27154.4	21268	1365.8	25442.3	18.6281	+	PD_HC	anatomical structure development;biological regulation;carbohydrate metabolic process;cell proliferation;cellular carbohydrate metabolic process;cellular component organization;cellular component organization or biogenesis;cellular lipid metabolic process;cellular macromolecule metabolic process;cellular membrane organization;cellular metabolic process;cellular process;cellular protein metabolic …	binding;calcium ion binding;cation binding;ion binding;metal ion binding	apical plasma membrane;brush border membrane;cell part;cell projection membrane;cell projection part;coated pit;cytoplasmic membrane-bounded vesicle;cytoplasmic part;cytoplasmic vesicle;endocytic vesicle;endoplasmic reticulum;endosome;extracellular membrane-bounded organelle;extracellular organelle;extracellular region part;extracellular vesicular exosome;Golgi apparatus;integral to membrane;intr…	Hedgehog signaling pathway		REACT_13523;REACT_24968	18	18	18	18	18	18	18	18	3.22719	0.000485714	4.01267	4.95326	P98164	P98164	P98164	LRP2_HUMAN	>sp|P98164|LRP2_HUMAN Low-density lipoprotein receptor-related protein 2 OS=Homo sapiens OX=9606 GN=LRP2 PE=1 SV=3
PTPRZ1	Receptor-type tyrosine-protein phosphatase zeta	18.4141	4.20274	+	11.0668	11.127	11.1727	11.4341	15.3199	15.3849	15.3943	15.2922	2145.06	2236.46	2308.44	2766.99	40902.5	42787.4	43067.1	40124.6	2272.45	41845	18.4141	+	PD_HC	anatomical structure development;anatomical structure morphogenesis;axonogenesis;behavior;biological regulation;cell differentiation;cell part morphogenesis;cell projection morphogenesis;cell projection organization;cellular component morphogenesis;cellular component organization;cellular component organization at cellular level;cellular component organization or biogenesis;cellular component org…	catalytic activity;hydrolase activity;hydrolase activity, acting on ester bonds;molecular transducer activity;phosphatase activity;phosphoprotein phosphatase activity;phosphoric ester hydrolase activity;protein tyrosine phosphatase activity;receptor activity;signal transducer activity;signaling receptor activity;transmembrane receptor protein phosphatase activity;transmembrane receptor protein ty…	cell part;extracellular matrix;extracellular matrix part;extracellular region part;integral to membrane;integral to plasma membrane;intrinsic to membrane;intrinsic to plasma membrane;membrane part;perineuronal net;plasma membrane part;proteinaceous extracellular matrix	Epithelial cell signaling in Helicobacter pylori infection			28	28	28	28	28	28	28	28	8.31422	0	4.14772	14.5706	P23471	P23471	P23471	PTPRZ_HUMAN	>sp|P23471|PTPRZ_HUMAN Receptor-type tyrosine-protein phosphatase zeta OS=Homo sapiens OX=9606 GN=PTPRZ1 PE=1 SV=4
RHPN2	Rhophilin-2	17.2046	4.10472	+	10.7645	7.29648	8.9253	8.74293	13.1183	12.8956	12.9864	12.8358	1739.55	157.202	486.164	428.434	8892.05	7620.13	8115.14	7310.73	457.299	7867.63	17.2046	+	PD_HC	biological regulation;cellular process;cellular response to stimulus;intracellular signal transduction;regulation of biological process;regulation of cellular process;response to stimulus;signal transduction;small GTPase mediated signal transduction		cell part;cytoplasm;cytoplasmic part;cytosol;intracellular membrane-bounded organelle;intracellular organelle;intracellular organelle part;intracellular part;membrane-bounded organelle;nuclear part;nucleoplasm;organelle;organelle part;perinuclear region of cytoplasm			REACT_355021	6	6	6	6	6	6	6	6	2.87633	0.000334975	4.02675	4.40664	Q8IUC4	Q8IUC4	Q8IUC4	RHPN2_HUMAN	>sp|Q8IUC4|RHPN2_HUMAN Rhophilin-2 OS=Homo sapiens OX=9606 GN=RHPN2 PE=1 SV=1
SPHK1	Sphingosine kinase 1	16.2404	4.02151	+	10.4	4.68534	9.50383	9.73308	13.6074	13.4984	13.802	13.6807	1351.18	25.7293	726.002	851.038	12480.6	11572.4	14282.9	13131.1	788.52	12805.9	16.2404	+	PD_HC	activation of protein kinase activity;activation of protein kinase C activity by G-protein coupled receptor protein signaling pathway;alcohol biosynthetic process;alcohol metabolic process;amine metabolic process;anatomical structure development;arachidonic acid metabolic process;biological regulation;biosynthetic process;blood vessel development;brain development;calcium-mediated signaling;carbo…	adenyl nucleotide binding;adenyl ribonucleotide binding;ATP binding;binding;calmodulin binding;catalytic activity;cation binding;D-erythro-sphingosine kinase activity;diacylglycerol kinase activity;DNA binding;enzyme binding;ion binding;kinase activity;lipid kinase activity;magnesium ion binding;metal ion binding;NAD+ kinase activity;nucleic acid binding;nucleotide binding;phosphatase binding;pho…	axon;cell part;cell projection;clathrin-coated vesicle;coated vesicle;cytoplasm;cytoplasmic membrane-bounded vesicle;cytoplasmic part;cytoplasmic vesicle;cytosol;intracellular membrane-bounded organelle;intracellular organelle;intracellular part;membrane;membrane-bounded organelle;membrane-bounded vesicle;neuron projection;nucleus;organelle;plasma membrane;synapse part;synaptic vesicle;vesicle	Calcium signaling pathway;Fc gamma R-mediated phagocytosis;ko05152;Sphingolipid metabolism;VEGF signaling pathway		REACT_115810;REACT_16907;REACT_264273	2	2	2	2	2	2	2	2	2.07588	0.00109502	5.06655	3.34693	Q9NYA1	Q9NYA1	Q9NYA1	SPHK1_HUMAN	>sp|Q9NYA1|SPHK1_HUMAN Sphingosine kinase 1 OS=Homo sapiens OX=9606 GN=SPHK1 PE=1 SV=1
FRZB	Secreted frizzled-related protein 3	15.6865	3.97146	+	12.9689	12.9523	12.9988	12.705	16.9513	16.7616	17.1481	16.9126	8017.3	7925.58	8185.19	6677.07	126721	111108	145242	123367	7971.44	125044	15.6865	+	PD_HC	anatomical structure development;anatomical structure morphogenesis;biological regulation;cell differentiation;cell surface receptor linked signaling pathway;cellular developmental process;cellular process;cellular response to stimulus;cochlea morphogenesis;convergent extension;convergent extension involved in organogenesis;developmental process;embryonic morphogenesis;mesenchymal cell differenti…	binding;protein binding;Wnt-protein binding	cell part;extracellular region part;extracellular space;membrane				6	6	6	6	6	6	6	6	7.69688	0	4.03713	13.258	Q92765	Q92765	Q92765	SFRP3_HUMAN	>sp|Q92765|SFRP3_HUMAN Secreted frizzled-related protein 3 OS=Homo sapiens OX=9606 GN=FRZB PE=1 SV=2
GYG2	Glycogenin-2	15.5803	3.96165	+	9.74449	6.46296	9.41658	10.4033	13.7898	13.3152	13.7233	13.3564	857.796	88.2155	683.397	1354.27	14162.6	10192.4	13524.6	10487.6	770.596	12006.1	15.5803	+	PD_HC	alcohol metabolic process;biosynthetic process;carbohydrate biosynthetic process;carbohydrate catabolic process;carbohydrate metabolic process;catabolic process;cellular biosynthetic process;cellular carbohydrate biosynthetic process;cellular carbohydrate catabolic process;cellular carbohydrate metabolic process;cellular glucan metabolic process;cellular macromolecule biosynthetic process;cellula…	catalytic activity;glucosyltransferase activity;glycogenin glucosyltransferase activity;transferase activity;transferase activity, transferring glycosyl groups;transferase activity, transferring hexosyl groups;UDP-glucosyltransferase activity;UDP-glycosyltransferase activity	cell part;cytoplasmic part;cytosol;intracellular organelle lumen;intracellular organelle part;intracellular part;lysosomal lumen;membrane-enclosed lumen;organelle lumen;organelle part;vacuolar lumen;vacuolar part			REACT_1008;REACT_169208;REACT_264430;REACT_355557	5	5	5	5	5	5	5	5	2.67576	0.000296943	4.53936	4.19932	O15488	O15488	O15488	GLYG2_HUMAN	>sp|O15488|GLYG2_HUMAN Glycogenin-2 OS=Homo sapiens OX=9606 GN=GYG2 PE=1 SV=2
OSBPL3	Oxysterol-binding protein-related protein 3	15.176	3.92372	+	12.1912	10.8075	11.8571	10.9221	15.3795	15.3725	15.3981	15.396	4676.46	1792.18	3709.73	1940.35	42627.6	42421.3	43180.7	43117.9	2825.04	42872.8	15.176	+	PD_HC	establishment of localization;lipid transport;organic substance transport;transport	binding;cholesterol binding;lipid binding;steroid binding;sterol binding	cell part;cytoplasmic part;cytosol;endoplasmic reticulum part;intracellular organelle part;intracellular part;membrane;nuclear membrane;nuclear part;organelle membrane;organelle part;perinuclear endoplasmic reticulum;plasma membrane				14	14	14	14	14	14	14	14	4.58822	0.00151111	3.94202	7.26757	Q9H4L5	Q9H4L5	Q9H4L5	OSBL3_HUMAN	>sp|Q9H4L5|OSBL3_HUMAN Oxysterol-binding protein-related protein 3 OS=Homo sapiens OX=9606 GN=OSBPL3 PE=1 SV=1
A2M	Alpha-2-macroglobulin	14.2335	3.83122	+	13.928	13.3845	13.8033	14.054	17.7297	17.6921	17.7043	17.6688	15586.4	10693.9	14295.8	17008.9	217356	211764	213563	208372	14941.1	212663	14.2335	+	PD_HC	biological regulation;blood coagulation;blood coagulation, intrinsic pathway;cell activation;cell differentiation;cellular component disassembly;cellular component disassembly at cellular level;cellular component organization;cellular component organization at cellular level;cellular component organization or biogenesis;cellular component organization or biogenesis at cellular level;cellular deve…	binding;calcium-dependent protein binding;chemokine binding;C-X-C chemokine binding;cytokine binding;endopeptidase inhibitor activity;endopeptidase regulator activity;enzyme binding;enzyme inhibitor activity;enzyme regulator activity;growth factor binding;interleukin-1 binding;interleukin-8 binding;peptidase inhibitor activity;peptidase regulator activity;protease binding;protein binding;receptor…	blood microparticle;cell part;cytoplasmic membrane-bounded vesicle lumen;cytoplasmic part;cytoplasmic vesicle part;cytosol;extracellular membrane-bounded organelle;extracellular organelle;extracellular region;extracellular region part;extracellular vesicular exosome;intracellular organelle part;intracellular part;membrane-bounded organelle;membrane-bounded vesicle;membrane-enclosed lumen;organell…	Complement and coagulation cascades	LRP-1-Alpha-2-M-annexin VI complex	REACT_11051;REACT_118572;REACT_13621;REACT_318;REACT_326	52	52	52	52	52	52	52	52	6.74749	0	3.9063	11.295	P01023	P01023	P01023	A2MG_HUMAN	>sp|P01023|A2MG_HUMAN Alpha-2-macroglobulin OS=Homo sapiens OX=9606 GN=A2M PE=1 SV=3
PDLIM3	PDZ and LIM domain protein 3	14.2131	3.82915	+	12.5767	12.2995	12.196	12.1966	16.1076	16.0453	16.0859	16.0703	6108.91	5041.02	4692.04	4693.99	70610.7	67626.4	69556.6	68808.5	4867.51	69182.6	14.2131	+	PD_HC	actin cytoskeleton organization;actin filament organization;actin filament-based process;anatomical structure development;cellular component organization;cellular component organization at cellular level;cellular component organization or biogenesis;cellular component organization or biogenesis at cellular level;cellular process;cytoskeleton organization;developmental process;heart development;or…	binding;cation binding;ion binding;metal ion binding;structural constituent of muscle;structural molecule activity;transition metal ion binding;zinc ion binding	actin cytoskeleton;cell part;contractile fiber part;cytoplasm;cytoplasmic part;cytoskeleton;intracellular non-membrane-bounded organelle;intracellular organelle;intracellular part;non-membrane-bounded organelle;organelle;organelle part;Z disc				8	8	8	8	8	8	8	8	7.8767	0	3.76011	12.9292	Q53GG5	Q53GG5	Q53GG5	PDLI3_HUMAN	>sp|Q53GG5|PDLI3_HUMAN PDZ and LIM domain protein 3 OS=Homo sapiens OX=9606 GN=PDLIM3 PE=1 SV=1
FABP7	Fatty acid-binding protein, brain	13.9924	3.80657	+	15.4094	16.2098	15.7365	15.5949	19.3522	19.5117	19.5765	19.4353	43520.3	75794.2	54595.7	49491.7	669257	747493	781832	708938	52043.7	728215	13.9924	+	PD_HC	acylglycerol catabolic process;acylglycerol metabolic process;anatomical structure development;biological regulation;catabolic process;cell differentiation;cell proliferation;cell proliferation in forebrain;cellular catabolic process;cellular developmental process;cellular lipid catabolic process;cellular lipid metabolic process;cellular metabolic process;cellular process;developmental process;ep…	binding;lipid binding;transporter activity	cell body;cell part;cell projection;cytoplasmic part;cytosol;intracellular membrane-bounded organelle;intracellular organelle;intracellular part;membrane-bounded organelle;neuronal cell body;nucleus;organelle	PPAR signaling pathway		REACT_494	9	9	9	9	9	9	9	9	6.11803	0	3.73126	9.87695	O15540	O15540	O15540	FABP7_HUMAN	>sp|O15540|FABP7_HUMAN Fatty acid-binding protein, brain OS=Homo sapiens OX=9606 GN=FABP7 PE=1 SV=3
ITGB4	Integrin beta-4	13.8503	3.79185	+	13.9574	13.1459	13.3072	13.1371	17.0376	16.8813	17.0653	17.0035	15907.3	9063.8	10136	9008.68	134533	120720	137141	131390	9599.9	132962	13.8503	+	PD_HC	anatomical structure development;autophagy;biological adhesion;biological regulation;catabolic process;cell adhesion;cell differentiation;cell junction assembly;cell junction organization;cell motility;cell projection assembly;cell projection organization;cell surface receptor linked signaling pathway;cell-matrix adhesion;cell-substrate adhesion;cell-substrate junction assembly;cellular catabolic…	binding;G-protein-coupled receptor binding;protein binding;receptor activity;receptor binding	basal plasma membrane;basement membrane;cell junction;cell leading edge;cell part;cell surface;cell-substrate junction;extracellular matrix part;extracellular membrane-bounded organelle;extracellular organelle;extracellular region part;extracellular vesicular exosome;hemidesmosome;integrin complex;macromolecular complex;membrane;membrane part;membrane-bounded organelle;membrane-bounded vesicle;or…	Arrhythmogenic right ventricular cardiomyopathy (ARVC);Dilated cardiomyopathy;ECM-receptor interaction;Focal adhesion;Hypertrophic cardiomyopathy (HCM);Regulation of actin cytoskeleton	ITGA6-ITGB4 complex;ITGA6-ITGB4-CD151 complex;ITGA6-ITGB4-CD9 complex;ITGA6-ITGB4-FYN complex;ITGA6-ITGB4-LAMA5 complex;ITGA6-ITGB4-Laminin10/12 complex;ITGA6-ITGB4-SHC1-GRB2 complex	REACT_150180;REACT_163942;REACT_169262;REACT_20537	23	23	23	23	23	23	23	23	5.75175	0.00309091	3.61	9.06262	P16144	P16144	P16144	ITB4_HUMAN	>sp|P16144|ITB4_HUMAN Integrin beta-4 OS=Homo sapiens OX=9606 GN=ITGB4 PE=1 SV=5
HAUS8	HAUS augmin-like complex subunit 8	13.7933	3.7859	+	7.32154	7.1854	0.459455	0.806388	10.0174	10.1704	9.8682	9.95907	159.957	145.553	1.37502	1.74883	1036.42	1152.38	934.597	995.357	73.6509	1015.89	13.7933	+	PD_HC	cell cycle phase;cell cycle process;cell division;cellular component assembly;cellular component assembly at cellular level;cellular component organization;cellular component organization at cellular level;cellular component organization or biogenesis;cellular component organization or biogenesis at cellular level;cellular process;centrosome organization;cytoskeleton organization;microtubule cyto…		cell part;centrosome;cytoplasm;cytoplasmic part;cytoskeletal part;HAUS complex;intracellular non-membrane-bounded organelle;intracellular organelle;intracellular organelle part;intracellular part;macromolecular complex;microtubule;microtubule associated complex;microtubule organizing center;non-membrane-bounded organelle;organelle;organelle part;protein complex;spindle pole				1	1	1	1	1	1	1	1	1.71229	0.00171613	6.06057	2.86721	Q9BT25	Q9BT25	Q9BT25	HAUS8_HUMAN	>sp|Q9BT25|HAUS8_HUMAN HAUS augmin-like complex subunit 8 OS=Homo sapiens OX=9606 GN=HAUS8 PE=1 SV=3
COX6A2	Cytochrome c oxidase subunit 6A2, mitochondrial	13.7172	3.77791	+	0.327488	8.84013	7.88916	0.554737	10.4633	11.2457	10.8613	10.0961	1.25483	458.294	237.068	1.4689	1411.78	2428.25	1860.27	1094.53	119.269	1636.03	13.7172	+	PD_HC	cellular metabolic process;cellular process;generation of precursor metabolites and energy;metabolic process	catalytic activity;cation transmembrane transporter activity;cytochrome-c oxidase activity;heme-copper terminal oxidase activity;hydrogen ion transmembrane transporter activity;inorganic cation transmembrane transporter activity;ion transmembrane transporter activity;monovalent inorganic cation transmembrane transporter activity;oxidoreductase activity;oxidoreductase activity, acting on a heme gr…	cell part;cytoplasmic part;intracellular organelle part;intracellular part;macromolecular complex;membrane part;mitochondrial membrane part;mitochondrial part;mitochondrial respiratory chain complex IV;organelle part;protein complex;respiratory chain complex IV	Alzheimer's disease;Cardiac muscle contraction;Huntington's disease;Oxidative phosphorylation;Parkinson's disease			1	1	1	1	1	1	1	1	1.45592	0.00251781	6.26372	2.49609	Q02221	Q02221	Q02221	CX6A2_HUMAN	>sp|Q02221|CX6A2_HUMAN Cytochrome c oxidase subunit 6A2, mitochondrial OS=Homo sapiens OX=9606 GN=COX6A2 PE=1 SV=2
MAOB	Amine oxidase [flavin-containing] B	12.8278	3.6812	+	12.9628	13.268	13.0352	13.3439	16.7938	16.8799	17.1146	16.7273	7983.47	9864.29	8394.33	10397.1	113615	120602	141908	108497	9129.31	117109	12.8278	+	PD_HC	alcohol catabolic process;alcohol metabolic process;amine catabolic process;amine metabolic process;anatomical structure development;benzene-containing compound metabolic process;biological regulation;biosynthetic process;catabolic process;catecholamine catabolic process;catecholamine metabolic process;catechol-containing compound catabolic process;catechol-containing compound metabolic process;c…	binding;catalytic activity;coenzyme binding;cofactor binding;electron carrier activity;flavin adenine dinucleotide binding;oxidoreductase activity;oxidoreductase activity, acting on the CH-NH2 group of donors;oxidoreductase activity, acting on the CH-NH2 group of donors, oxygen as acceptor;primary amine oxidase activity	cell part;cytoplasmic part;envelope;extracellular membrane-bounded organelle;extracellular organelle;extracellular region part;extracellular vesicular exosome;integral to membrane;intracellular membrane-bounded organelle;intracellular organelle;intracellular organelle part;intracellular part;intrinsic to membrane;membrane;membrane part;membrane-bounded organelle;membrane-bounded vesicle;mitochond…	Arginine and proline metabolism;Drug metabolism - cytochrome P450;Glycine, serine and threonine metabolism;Histidine metabolism;Isoquinoline alkaloid biosynthesis;Phenylalanine metabolism;Tryptophan metabolism;Tyrosine metabolism		REACT_416	16	16	16	16	16	16	16	16	7.0382	0	3.72645	11.489	P27338	P27338	P27338	AOFB_HUMAN	>sp|P27338|AOFB_HUMAN Amine oxidase [flavin-containing] B OS=Homo sapiens OX=9606 GN=MAOB PE=1 SV=3
NTN1	Netrin-1	12.3851	3.63053	+	11.8113	11.2023	12.1812	11.8504	15.6743	15.4671	15.4559	15.4455	3593.81	2356.29	4644.15	3692.55	52291.9	45296.1	44945.8	44623	3643.18	45121	12.3851	+	PD_HC	anatomical structure morphogenesis;anterior/posterior axon guidance;apoptosis;axon guidance;biological adhesion;biological regulation;cell adhesion;cell death;cell migration;cell motility;cell-cell adhesion;cellular component movement;cellular process;chemotaxis;death;developmental process;embryonic morphogenesis;epithelial tube morphogenesis;establishment of localization;establishment of localiz…		basement membrane;cell part;cytoplasm;extracellular matrix part;extracellular region;extracellular region part;intracellular part	Axon guidance		REACT_22228;REACT_22237;REACT_22351;REACT_22384;REACT_25299	19	19	19	19	19	19	19	19	5.68796	0.0032381	3.7494	9.11847	O95631	O95631	O95631	NET1_HUMAN	>sp|O95631|NET1_HUMAN Netrin-1 OS=Homo sapiens OX=9606 GN=NTN1 PE=1 SV=2
PEX2	Peroxisome biogenesis factor 2	12.3785	3.62976	+	0.196193	6.21228	0.399019	7.56189	8.74603	8.97948	9.02028	8.23504	1.14567	74.1451	1.31861	188.954	429.356	504.769	519.248	301.296	37.7319	467.063	12.3785	+	PD_HC	bile acid biosynthetic process;bile acid metabolic process;biological regulation;biosynthetic process;carboxylic acid biosynthetic process;carboxylic acid catabolic process;carboxylic acid metabolic process;catabolic process;cell migration;cell motility;cellular biosynthetic process;cellular catabolic process;cellular component movement;cellular component organization;cellular component organizat…	acid-amino acid ligase activity;binding;catalytic activity;cation binding;ion binding;ligase activity;ligase activity, forming carbon-nitrogen bonds;metal ion binding;small conjugating protein ligase activity;transition metal ion binding;ubiquitin-protein ligase activity;zinc ion binding	Cdc73/Paf1 complex;cell part;cytoplasmic part;integral to membrane;integral to organelle membrane;integral to peroxisomal membrane;intracellular membrane-bounded organelle;intracellular organelle;intracellular organelle part;intracellular part;intrinsic to membrane;intrinsic to organelle membrane;intrinsic to peroxisomal membrane;macromolecular complex;membrane;membrane part;membrane-bounded orga…	Peroxisome			1	1	1	1	1	1	1	1	1.43065	0.00269623	5.15286	2.41809	P28328	P28328	P28328	PEX2_HUMAN	>sp|P28328|PEX2_HUMAN Peroxisome biogenesis factor 2 OS=Homo sapiens OX=9606 GN=PEX2 PE=1 SV=2
TMSB15A;TMSB15B	Thymosin beta-15A;Thymosin beta-15B	12.0153	3.58681	+	18.0321	14.2128	14.0554	14.521	18.053	14.5444	18.1083	17.8647	268042	18988	17025.4	23510.2	271953	23894.6	282580	238677	21249.1	255315	12.0153	+	PD_HC	actin cytoskeleton organization;actin filament organization;actin filament-based process;biological regulation;cellular component organization;cellular component organization at cellular level;cellular component organization or biogenesis;cellular component organization or biogenesis at cellular level;cellular process;cytoskeleton organization;maintenance of location;maintenance of protein locati…		cell part;cytoplasm;cytoskeleton;intracellular non-membrane-bounded organelle;intracellular organelle;intracellular part;non-membrane-bounded organelle;organelle				1	1	1	1	1	1	1	1	0.739357	0.0343389	1.93729	1.30499	P0CG34;P0CG35	P0CG34;P0CG35	P0CG34;P0CG35	TB15A_HUMAN;TB15B_HUMAN	>sp|P0CG34|TB15A_HUMAN Thymosin beta-15A OS=Homo sapiens OX=9606 GN=TMSB15A PE=1 SV=1;>sp|P0CG35|TB15B_HUMAN Thymosin beta-15B OS=Homo sapiens OX=9606 GN=TMSB15B PE=1 SV=1
CASC3	Protein CASC3	11.726	3.55164	+	10.0839	6.3855	0.562575	0.730577	8.93399	9.26603	8.99633	8.86621	1085.32	83.604	1.4769	1.6593	489.101	615.677	510.699	466.654	42.6316	499.9	11.726	+	PD_HC	biological regulation;catabolic process;cellular catabolic process;cellular localization;cellular macromolecule catabolic process;cellular macromolecule localization;cellular macromolecule metabolic process;cellular metabolic process;cellular nitrogen compound metabolic process;cellular process;establishment of localization;establishment of RNA localization;gene expression;intracellular mRNA loca…	binding;enzyme binding;identical protein binding;protein binding;ubiquitin protein ligase binding	cell part;cytoplasmic part;cytosol;exon-exon junction complex;intracellular organelle part;intracellular part;macromolecular complex;nuclear body;nuclear part;nuclear speck;nucleoplasm part;organelle part;perinuclear region of cytoplasm;protein complex;ribonucleoprotein complex	mRNA surveillance pathway;RNA transport	eIF4AIII-Btz complex;Exon junction complex (EIF4A3-MLN51-MAGOH-Y14);Exon junction complex (EIF4A3-MLN51-MAGOH-Y14), RNA-protein complex;Exon junction complex (EIF4A3-MLN51-UPF3B-MAGOH-Y14);Exon junction complex (F4A3-MLN51-UPF3B-MAGOH-Y14-PYM);Exon junction complex, EIF4A3-MLN51-MAGOH-Y14 (RNA-protein complex)	REACT_75822	1	1	1	1	1	1	1	1	1.01793	0.0101043	4.575	1.8163	O15234	O15234	O15234	CASC3_HUMAN	>sp|O15234|CASC3_HUMAN Protein CASC3 OS=Homo sapiens OX=9606 GN=CASC3 PE=1 SV=2
PREX1	Phosphatidylinositol 3,4,5-trisphosphate-dependent Rac exchanger 1 protein	11.4375	3.5157	+	13.5321	13.0515	12.9807	13.6412	16.9315	16.7944	16.8597	16.6678	11845.9	8489.71	8083.14	12776.5	124994	113663	118926	104114	10167.8	116294	11.4375	+	PD_HC	actin cytoskeleton organization;actin filament organization;actin filament polymerization;actin filament-based process;actin polymerization or depolymerization;biological regulation;cell activation;cell chemotaxis;cell differentiation;cell migration;cell motility;cell surface receptor linked signaling pathway;cellular component assembly;cellular component assembly at cellular level;cellular compo…	binding;enzyme activator activity;enzyme binding;enzyme regulator activity;GTPase activator activity;GTPase regulator activity;guanyl-nucleotide exchange factor activity;lipid binding;nucleoside-triphosphatase regulator activity;phospholipid binding;protein binding;Ras guanyl-nucleotide exchange factor activity;Rho guanyl-nucleotide exchange factor activity;small GTPase regulator activity	cell part;cell projection part;cytoplasm;cytoplasmic part;cytosol;dendritic shaft;growth cone;intracellular membrane-bounded organelle;intracellular organelle;intracellular part;membrane;membrane-bounded organelle;organelle;perinuclear region of cytoplasm;plasma membrane;site of polarized growth	Chemokine signaling pathway			17	17	17	17	17	17	17	17	5.98831	0.0034	3.51195	9.34089	Q8TCU6	Q8TCU6	Q8TCU6	PREX1_HUMAN	>sp|Q8TCU6|PREX1_HUMAN Phosphatidylinositol 3,4,5-trisphosphate-dependent Rac exchanger 1 protein OS=Homo sapiens OX=9606 GN=PREX1 PE=1 SV=3
CLN6	Ceroid-lipofuscinosis neuronal protein 6	11.3787	3.50826	+	0.32827	0.587353	7.87018	6.94356	9.67446	9.63184	9.12852	9.28615	1.25551	1.50249	233.97	123.089	817.152	793.364	559.704	624.324	62.2958	708.844	11.3787	+	PD_HC	alcohol metabolic process;amine metabolic process;aminoglycan metabolic process;biological regulation;carbohydrate metabolic process;catabolic process;cation homeostasis;cellular catabolic process;cellular cation homeostasis;cellular chemical homeostasis;cellular homeostasis;cellular ion homeostasis;cellular lipid metabolic process;cellular macromolecule catabolic process;cellular macromolecule m…	binding;identical protein binding;protein binding;protein dimerization activity;protein homodimerization activity	cell part;cytoplasmic part;endoplasmic reticulum;endoplasmic reticulum lumen;endoplasmic reticulum membrane;endoplasmic reticulum part;integral to membrane;intracellular membrane-bounded organelle;intracellular organelle;intracellular organelle lumen;intracellular organelle part;intracellular part;intrinsic to membrane;membrane;membrane part;membrane-bounded organelle;membrane-enclosed lumen;nucl…				1	1	1	1	1	1	1	1	1.46139	0.00261092	5.4979	2.47654	Q9NWW5	Q9NWW5	Q9NWW5	CLN6_HUMAN	>sp|Q9NWW5|CLN6_HUMAN Ceroid-lipofuscinosis neuronal protein 6 OS=Homo sapiens OX=9606 GN=CLN6 PE=1 SV=1
LCMT2	tRNA wybutosine-synthesizing protein 4	11.1804	3.48289	+	0.35715	9.28963	0.556998	8.02482	10.5582	10.4722	10.4059	10.6889	1.28089	625.831	1.4712	260.442	1507.77	1420.52	1356.71	1650.74	130.957	1464.14	11.1804	+	PD_HC	cellular macromolecule metabolic process;cellular metabolic process;cellular nitrogen compound metabolic process;cellular process;macromolecule metabolic process;metabolic process;ncRNA metabolic process;ncRNA processing;nitrogen compound metabolic process;nucleic acid metabolic process;nucleobase-containing compound metabolic process;primary metabolic process;RNA metabolic process;RNA processing…	catalytic activity;methyltransferase activity;transferase activity;transferase activity, transferring one-carbon groups		Histidine metabolism;Polycyclic aromatic hydrocarbon degradation;Tyrosine metabolism			1	1	1	1	1	1	1	1	1.33679	0.00312588	5.97416	2.31346	O60294	O60294	O60294	TYW4_HUMAN	>sp|O60294|TYW4_HUMAN tRNA wybutosine-synthesizing protein 4 OS=Homo sapiens OX=9606 GN=LCMT2 PE=1 SV=3
CD44	CD44 antigen	11.1449	3.47831	+	13.4023	13.3661	13.7685	13.6858	17.024	16.9229	17.0346	17.1234	10826.7	10558.4	13955.1	13177.6	133271	124251	134253	142777	12002.1	133762	11.1449	+	PD_HC	amine metabolic process;aminoglycan catabolic process;aminoglycan metabolic process;anatomical structure development;anatomical structure morphogenesis;biological adhesion;biological regulation;blood coagulation;branching involved in prostate gland morphogenesis;branching involved in ureteric bud morphogenesis;branching morphogenesis of a tube;carbohydrate catabolic process;carbohydrate metabolic…	binding;carbohydrate binding;catalytic activity;collagen binding;glycosaminoglycan binding;hexosaminidase activity;hyaluronic acid binding;hyalurononglucosaminidase activity;hydrolase activity;hydrolase activity, acting on glycosyl bonds;hydrolase activity, hydrolyzing O-glycosyl compounds;pattern binding;polysaccharide binding;protein binding	adherens junction;anchoring junction;basolateral plasma membrane;cell junction;cell part;cell surface;cell-substrate adherens junction;cell-substrate junction;cytoplasm;cytoplasmic part;external side of plasma membrane;extracellular membrane-bounded organelle;extracellular organelle;extracellular region part;extracellular vesicular exosome;focal adhesion;Golgi apparatus;integral to membrane;integ…	ECM-receptor interaction;Hematopoietic cell lineage;Shigellosis		REACT_118572;REACT_12051;REACT_120996;REACT_13552;REACT_25078	8	8	8	8	8	8	8	8	7.20157	0	3.47056	11.2412	P16070	P16070	P16070	CD44_HUMAN	>sp|P16070|CD44_HUMAN CD44 antigen OS=Homo sapiens OX=9606 GN=CD44 PE=1 SV=3
C1QTNF6	Complement C1q tumor necrosis factor-related protein 6	10.9572	3.45381	+	11.0197	7.27131	7.76691	8.1967	11.221	11.6503	11.6894	11.1211	2076.16	154.484	217.808	293.395	2387.03	3214.32	3302.63	2227.33	255.601	2800.68	10.9572	+	PD_HC	cellular component assembly;cellular component organization;cellular component organization or biogenesis;macromolecular complex assembly;macromolecular complex subunit organization;protein complex assembly;protein complex subunit organization;protein heterooligomerization;protein heterotrimerization;protein oligomerization;protein trimerization		collagen;extracellular matrix part;extracellular region part;extracellular space				1	1	1	1	1	1	1	1	1.812	0.00178784	2.85681	2.71367	Q9BXI9	Q9BXI9	Q9BXI9	C1QT6_HUMAN	>sp|Q9BXI9|C1QT6_HUMAN Complement C1q tumor necrosis factor-related protein 6 OS=Homo sapiens OX=9606 GN=C1QTNF6 PE=1 SV=4
ITGBL1	Integrin beta-like protein 1	10.7756	3.4297	+	6.22165	7.89425	7.97976	9.20468	11.3776	10.907	11.4707	11.357	74.6283	237.906	252.434	590.045	2660.72	1920.15	2838.08	2623	245.17	2641.86	10.7756	+	PD_HC	biological adhesion;cell adhesion;cellular process		extracellular region				4	4	4	4	4	4	4	4	2.82812	0.000291845	3.453	4.18328	O95965	O95965	O95965	ITGBL_HUMAN	>sp|O95965|ITGBL_HUMAN Integrin beta-like protein 1 OS=Homo sapiens OX=9606 GN=ITGBL1 PE=2 SV=1
SLC1A3	Excitatory amino acid transporter 1	10.5881	3.40438	+	11.2931	11.6169	11.6325	11.5248	14.9456	14.909	15.0272	15.0057	2509.35	3140.76	3174.91	2946.53	31555.4	30764.9	33391.7	32897.7	3043.65	32226.6	10.5881	+	PD_HC	acidic amino acid transport;amine biosynthetic process;amine metabolic process;amine transport;amino acid import;amino acid transport;anatomical structure development;anatomical structure morphogenesis;anion transport;aspartate transport;auditory behavior;behavior;biological regulation;biosynthetic process;carboxylic acid biosynthetic process;carboxylic acid metabolic process;carboxylic acid tran…	acidic amino acid transmembrane transporter activity;active transmembrane transporter activity;amine binding;amine transmembrane transporter activity;amino acid binding;amino acid transmembrane transporter activity;anion transmembrane transporter activity;anion:cation symporter activity;binding;carboxylic acid binding;carboxylic acid transmembrane transporter activity;cation transmembrane transpo…	cell body;cell part;cell projection;cell surface;extracellular matrix part;extracellular region part;fibril;integral to membrane;intrinsic to membrane;membrane;membrane part;neuronal cell body;plasma membrane			REACT_12591;REACT_13639;REACT_19397	4	4	4	4	4	4	4	4	7.89598	0	3.45502	12.2156	P43003	P43003	P43003	EAA1_HUMAN	>sp|P43003|EAA1_HUMAN Excitatory amino acid transporter 1 OS=Homo sapiens OX=9606 GN=SLC1A3 PE=1 SV=1
AIF1L	Allograft inflammatory factor 1-like	10.4909	3.39107	+	11.4241	3.99546	9.52376	10.2805	13.2257	13.6596	13.4501	12.8591	2747.87	15.9497	736.101	1243.77	9579.27	12940.4	11191.4	7429.76	989.934	10385.3	10.4909	+	PD_HC		actin binding;actin filament binding;binding;calcium ion binding;cation binding;cytoskeletal protein binding;ion binding;metal ion binding;protein binding	actin cytoskeleton;adherens junction;anchoring junction;cell junction;cell part;cell projection membrane;cell projection part;cell-substrate adherens junction;cell-substrate junction;cytoplasm;cytoskeleton;extracellular membrane-bounded organelle;extracellular organelle;extracellular region part;extracellular vesicular exosome;focal adhesion;intracellular non-membrane-bounded organelle;intracellu…				3	3	3	3	3	3	3	3	1.45328	0.00269324	4.49269	2.41642	Q9BQI0	Q9BQI0	Q9BQI0	AIF1L_HUMAN	>sp|Q9BQI0|AIF1L_HUMAN Allograft inflammatory factor 1-like OS=Homo sapiens OX=9606 GN=AIF1L PE=1 SV=1
CAPS	Calcyphosin	9.58429	3.26067	+	11.8751	12.775	12.7238	12.4818	15.8483	15.9699	15.8885	15.6017	3756.31	7009.03	6764.65	5720	58994.8	64182.8	60661.8	49725.6	6242.33	59828.3	9.58429	+	PD_HC	biological regulation;cellular process;cellular response to stimulus;intracellular signal transduction;regulation of biological process;regulation of cellular process;response to stimulus;signal transduction	binding;calcium ion binding;cation binding;ion binding;metal ion binding	cell part;cytoplasm;extracellular membrane-bounded organelle;extracellular organelle;extracellular region part;extracellular vesicular exosome;intracellular membrane-bounded organelle;intracellular organelle;intracellular part;membrane;membrane-bounded organelle;membrane-bounded vesicle;nucleus;organelle;plasma membrane;vesicle				11	11	11	11	11	11	11	11	5.29261	0.002125	3.36316	7.98622	Q13938	Q13938	Q13938	CAYP1_HUMAN	>sp|Q13938|CAYP1_HUMAN Calcyphosin OS=Homo sapiens OX=9606 GN=CAPS PE=1 SV=2
RTL8B	Retrotransposon Gag-like protein 8B	9.49719	3.2475	+	11.9403	0.971315	8	0.474435	8.19645	9.90534	10.542	10.9135	3929.96	1.96063	256	1.38937	293.344	958.969	1490.93	1928.82	128.98	1224.95	9.49719	+	PD_HC							1	1	1	1	1	1	1	1	0.789026	0.0217519	4.54278	1.48751	Q17RB0	Q17RB0	Q17RB0	RTL8B_HUMAN	>sp|Q17RB0|RTL8B_HUMAN Retrotransposon Gag-like protein 8B OS=Homo sapiens OX=9606 GN=RTL8B PE=1 SV=1
PLXDC1	Plexin domain-containing protein 1	9.4075	3.23381	+	8.94357	6.35493	5.3675	5.99827	9.42535	9.41745	9.30038	9.46038	492.36	81.8511	41.2837	63.9233	687.564	683.809	630.512	704.463	72.8872	685.687	9.4075	+	PD_HC	anatomical structure development;anatomical structure formation involved in morphogenesis;angiogenesis;developmental process;spinal cord development	receptor activity	cell body;cell junction;cell part;cell projection;cell-cell junction;cytoplasm;dendrite;extracellular region;extracellular region part;extracellular space;integral to membrane;intracellular;intracellular part;intrinsic to membrane;macromolecular complex;membrane;membrane part;neuron projection;neuronal cell body;occluding junction;plasma membrane;protein complex;receptor complex;tight junction				4	4	4	4	4	4	4	4	1.8789	0.00165089	2.73482	2.77112	Q8IUK5	Q8IUK5	Q8IUK5	PLDX1_HUMAN	>sp|Q8IUK5|PLDX1_HUMAN Plexin domain-containing protein 1 OS=Homo sapiens OX=9606 GN=PLXDC1 PE=1 SV=2
PON2	Serum paraoxonase/arylesterase 2	9.36351	3.22705	+	14.8608	14.5652	14.6928	14.7613	17.8648	17.9271	17.9987	17.9814	29754.1	24241.6	26483.4	27771.2	238694	249227	261908	258786	27127.3	254006	9.36351	+	PD_HC	aromatic compound catabolic process;catabolic process;cellular aromatic compound metabolic process;cellular catabolic process;cellular metabolic process;cellular process;metabolic process;response to chemical stimulus;response to oxidative stress;response to stimulus;response to stress	arylesterase activity;binding;carboxylic ester hydrolase activity;catalytic activity;cation binding;hydrolase activity;hydrolase activity, acting on ester bonds;identical protein binding;ion binding;metal ion binding;protein binding	cell part;cytoplasmic part;extracellular region;intracellular membrane-bounded organelle;intracellular organelle;intracellular part;lysosome;lytic vacuole;membrane;membrane-bounded organelle;mitochondrion;nucleus;organelle;plasma membrane;vacuole	Aminobenzoate degradation;Bisphenol degradation			14	14	14	14	14	14	14	14	8.18945	0	3.22298	11.9804	Q15165	Q15165	Q15165	PON2_HUMAN	>sp|Q15165|PON2_HUMAN Serum paraoxonase/arylesterase 2 OS=Homo sapiens OX=9606 GN=PON2 PE=1 SV=4
CA2	Carbonic anhydrase 2	9.3334	3.2224	+	15.2906	13.6445	13.0424	13.458	16.6984	16.8509	16.8716	16.5933	40080.1	12805.7	8436.33	11252.8	106346	118202	119911	98873.8	12029.3	112274	9.3334	+	PD_HC	anatomical structure development;anatomical structure morphogenesis;anion transport;bicarbonate transport;biological regulation;cation homeostasis;cellular cation homeostasis;cellular chemical homeostasis;cellular homeostasis;cellular ion homeostasis;cellular metabolic process;cellular monovalent inorganic cation homeostasis;cellular process;cellular response to fluid shear stress;cellular respon…	arylesterase activity;binding;carbonate dehydratase activity;carbon-oxygen lyase activity;carboxylic ester hydrolase activity;catalytic activity;cation binding;hydrolase activity;hydrolase activity, acting on ester bonds;hydro-lyase activity;ion binding;lyase activity;metal ion binding;transition metal ion binding;zinc ion binding	apical part of cell;axon;basolateral plasma membrane;cell part;cell projection;cytoplasm;cytoplasmic part;cytosol;extracellular membrane-bounded organelle;extracellular organelle;extracellular region part;extracellular space;extracellular vesicular exosome;intracellular part;membrane;membrane part;membrane-bounded organelle;membrane-bounded vesicle;microvillus;myelin sheath;neuron projection;orga…	Nitrogen metabolism		REACT_121123;REACT_121329;REACT_121380	10	10	10	10	10	10	10	10	2.94394	0.000278689	2.89464	4.14746	P00918	P00918	P00918	CAH2_HUMAN	>sp|P00918|CAH2_HUMAN Carbonic anhydrase 2 OS=Homo sapiens OX=9606 GN=CA2 PE=1 SV=2
HS6ST1	Heparan-sulfate 6-O-sulfotransferase 1	9.31286	3.21922	+	8.21367	0.590254	6.66496	0.654969	8.09766	9.15531	8.6054	9.29926	296.866	1.50551	101.474	1.57458	273.929	570.194	389.479	630.023	51.5241	479.836	9.31286	+	PD_HC	amine metabolic process;aminoglycan biosynthetic process;aminoglycan metabolic process;anatomical structure development;anatomical structure formation involved in morphogenesis;angiogenesis;biosynthetic process;blood vessel development;carbohydrate biosynthetic process;carbohydrate metabolic process;cell development;cellular developmental process;cellular macromolecule metabolic process;cellular …	catalytic activity;heparan sulfate 6-O-sulfotransferase activity;heparan sulfate sulfotransferase activity;sulfotransferase activity;transferase activity;transferase activity, transferring sulfur-containing groups	cell part;cytoplasmic part;Golgi apparatus part;Golgi membrane;integral to membrane;integral to plasma membrane;intracellular organelle part;intracellular part;intrinsic to membrane;intrinsic to plasma membrane;membrane;membrane part;organelle membrane;organelle part;plasma membrane part	Glycosaminoglycan biosynthesis - heparan sulfate		REACT_121248	1	1	1	1	1	1	1	1	1.25264	0.00445704	4.75845	2.15125	O60243	O60243	O60243	H6ST1_HUMAN	>sp|O60243|H6ST1_HUMAN Heparan-sulfate 6-O-sulfotransferase 1 OS=Homo sapiens OX=9606 GN=HS6ST1 PE=1 SV=5
TFPI2	Tissue factor pathway inhibitor 2	9.02241	3.17351	+	13.7612	13.6218	13.548	12.8627	16.8711	16.6372	16.5666	16.9317	13884.6	12605.8	11977.2	7448.32	119869	101929	97060.7	125011	12291.5	110899	9.02241	+	PD_HC	biological regulation;blood coagulation;coagulation;hemostasis;multicellular organismal process;regulation of biological quality;regulation of body fluid levels	endopeptidase inhibitor activity;endopeptidase regulator activity;enzyme inhibitor activity;enzyme regulator activity;extracellular matrix structural constituent;peptidase inhibitor activity;peptidase regulator activity;serine-type endopeptidase inhibitor activity;structural molecule activity	cell part;extracellular matrix;extracellular region part;intracellular membrane-bounded organelle;intracellular organelle;intracellular part;membrane-bounded organelle;nucleus;organelle;proteinaceous extracellular matrix				10	10	10	10	10	10	10	10	5.27266	0.00188889	3.30323	7.88572	P48307	P48307	P48307	TFPI2_HUMAN	>sp|P48307|TFPI2_HUMAN Tissue factor pathway inhibitor 2 OS=Homo sapiens OX=9606 GN=TFPI2 PE=1 SV=1
GLDC	Glycine dehydrogenase (decarboxylating), mitochondrial	8.97146	3.16534	+	11.9589	8.4599	8.18608	7.31592	11.5894	11.31	11.7183	11.3936	3980.96	352.114	291.243	159.335	3081.46	2538.92	3369.46	2690.39	321.679	2885.93	8.97146	+	PD_HC	amine catabolic process;amine metabolic process;carboxylic acid catabolic process;carboxylic acid metabolic process;catabolic process;cellular amine metabolic process;cellular amino acid catabolic process;cellular amino acid metabolic process;cellular catabolic process;cellular ketone metabolic process;cellular metabolic process;cellular nitrogen compound metabolic process;cellular process;glycin…	binding;catalytic activity;cofactor binding;electron carrier activity;glycine dehydrogenase (decarboxylating) activity;lyase activity;oxidoreductase activity;oxidoreductase activity, acting on the CH-NH2 group of donors;oxidoreductase activity, acting on the CH-NH2 group of donors, disulfide as acceptor;pyridoxal phosphate binding;vitamin B6 binding;vitamin binding	cell part;cytoplasmic part;intracellular membrane-bounded organelle;intracellular organelle;intracellular part;membrane-bounded organelle;mitochondrion;organelle	Glycine, serine and threonine metabolism			12	12	12	12	12	12	12	12	1.30714	0.00588043	2.52264	2.05661	P23378	P23378	P23378	GCSP_HUMAN	>sp|P23378|GCSP_HUMAN Glycine dehydrogenase (decarboxylating), mitochondrial OS=Homo sapiens OX=9606 GN=GLDC PE=1 SV=2
FGF1	Fibroblast growth factor 1	8.70653	3.1221	+	9.53954	7.85158	9.71437	9.3207	12.443	12.5698	12.6887	12.5428	744.197	230.973	840.072	639.455	5568.22	6079.77	6602.06	5967.04	691.826	6023.4	8.70653	+	PD_HC	anatomical structure development;anatomical structure formation involved in morphogenesis;anatomical structure morphogenesis;angiogenesis;axis elongation;biological regulation;branch elongation involved in ureteric bud branching;branch elongation of an epithelium;cell communication;cell surface receptor linked signaling pathway;cell-cell signaling;cell-cell signaling involved in cell fate commitm…	binding;carbohydrate binding;fibroblast growth factor receptor binding;glycosaminoglycan binding;growth factor activity;growth factor receptor binding;heparin binding;pattern binding;polysaccharide binding;protein binding;receptor binding	cell cortex;cell part;cytoplasmic part;cytosol;extracellular matrix;extracellular region;extracellular region part;extracellular space;intracellular non-membrane-bounded organelle;intracellular organelle;intracellular organelle part;intracellular part;non-membrane-bounded organelle;nuclear part;nucleolus;nucleoplasm;organelle;organelle part;proteinaceous extracellular matrix	MAPK signaling pathway;Melanoma;Pathways in cancer;Regulation of actin cytoskeleton		REACT_110235;REACT_120863;REACT_121153;REACT_121249;REACT_121337;REACT_147727;REACT_355069;REACT_355144;REACT_355146;REACT_355159;REACT_355160;REACT_355194;REACT_355197;REACT_355202;REACT_355212;REACT_355216;REACT_355218;REACT_355221;REACT_355225;REACT_355227;REACT_355304;REACT_355313;REACT_355450;REACT_355511;REACT_355514;REACT_355552;REACT_355580;REACT_355584;REACT_355588;REACT_75829;REACT_9400…	3	3	3	3	3	3	3	3	3.70738	0.000686869	3.45454	5.49224	P05230	P05230	P05230	FGF1_HUMAN	>sp|P05230|FGF1_HUMAN Fibroblast growth factor 1 OS=Homo sapiens OX=9606 GN=FGF1 PE=1 SV=1
CLIC6	Chloride intracellular channel protein 6	8.69954	3.12094	+	11.7993	11.2819	10.3875	10.6653	13.9279	14.3927	14.2502	13.9928	3564.05	2489.95	1339.52	1623.96	15585.3	21509.7	19486.7	16302.4	2056.95	17894.6	8.69954	+	PD_HC		anion channel activity;anion transmembrane transporter activity;channel activity;chloride channel activity;gated channel activity;ion channel activity;ion transmembrane transporter activity;passive transmembrane transporter activity;substrate-specific channel activity;substrate-specific transmembrane transporter activity;substrate-specific transporter activity;transmembrane transporter activity;t…	cell part;chloride channel complex;cytoplasm;extracellular membrane-bounded organelle;extracellular organelle;extracellular region part;extracellular vesicular exosome;intracellular part;ion channel complex;macromolecular complex;membrane;membrane part;membrane-bounded organelle;membrane-bounded vesicle;organelle;plasma membrane;protein complex;vesicle				16	16	16	16	16	16	16	16	4.05449	0.0008	3.1074	5.81231	Q96NY7	Q96NY7	Q96NY7	CLIC6_HUMAN	>sp|Q96NY7|CLIC6_HUMAN Chloride intracellular channel protein 6 OS=Homo sapiens OX=9606 GN=CLIC6 PE=2 SV=3
HEATR5A	HEAT repeat-containing protein 5A	8.62973	3.10932	+	10.6806	8.42205	9.67591	9.82595	12.7189	13.0623	12.9324	12.7884	1641.27	342.996	817.973	907.623	6741.72	8553.5	7817	7074.44	862.798	7445.72	8.62973	+	PD_HC							9	9	9	9	9	9	9	9	3.31649	0.000419753	3.22436	4.79913	Q86XA9	Q86XA9	Q86XA9	HTR5A_HUMAN	>sp|Q86XA9|HTR5A_HUMAN HEAT repeat-containing protein 5A OS=Homo sapiens OX=9606 GN=HEATR5A PE=1 SV=2
PAX6	Paired box protein Pax-6	8.36734	3.06477	+	8.926	0.573847	11.1398	0.675669	11.3493	11.1134	10.77	10.8671	486.4	1.48849	2256.39	1.59734	2609.03	2215.47	1746.2	1867.77	243.999	2041.62	8.36734	+	PD_HC	ameboidal cell migration;anatomical structure development;anatomical structure morphogenesis;anterior/posterior pattern specification;astrocyte differentiation;axis specification;axon guidance;biological regulation;biosynthetic process;blood vessel development;carbohydrate homeostasis;cell cycle process;cell development;cell differentiation;cell fate commitment;cell fate determination;cell fate s…	acid-amino acid ligase activity;AT DNA binding;binding;catalytic activity;chromatin binding;core promoter binding;core promoter proximal region DNA binding;core promoter proximal region sequence-specific DNA binding;core promoter sequence-specific DNA binding;DNA binding;double-stranded DNA binding;enzyme binding;histone acetyltransferase binding;kinase binding;ligase activity;ligase activity, fo…	cell part;chromatin;chromosomal part;cytoplasm;intracellular membrane-bounded organelle;intracellular organelle;intracellular organelle part;intracellular part;membrane-bounded organelle;nuclear chromatin;nuclear chromosome part;nuclear part;nucleoplasm;nucleus;organelle;organelle part	Maturity onset diabetes of the young	PAX6-SOX2 DNA-protein complex	REACT_13819;REACT_23824;REACT_24019	1	1	1	1	1	1	1	1	1.07422	0.00782111	5.69614	1.92673	P26367	P26367	P26367	PAX6_HUMAN	>sp|P26367|PAX6_HUMAN Paired box protein Pax-6 OS=Homo sapiens OX=9606 GN=PAX6 PE=1 SV=2
SYNM	Synemin	8.34348	3.06065	+	13.8014	14.2973	14.229	14.3935	17.3212	17.2369	17.3465	17.3272	14276.9	20133.4	19202.4	21521.6	163757	154463	166654	164440	19667.9	164099	8.34348	+	PD_HC	cellular component organization;cellular component organization at cellular level;cellular component organization or biogenesis;cellular component organization or biogenesis at cellular level;cellular process;cytoskeleton organization;intermediate filament cytoskeleton organization;intermediate filament-based process;organelle organization	binding;cytoskeletal protein binding;intermediate filament binding;protein binding;protein complex binding;structural constituent of cytoskeleton;structural constituent of muscle;structural molecule activity;vinculin binding	adherens junction;anchoring junction;cell junction;cell part;contractile fiber part;costamere;cytoplasmic part;cytoskeletal part;cytoskeleton;intermediate filament;intermediate filament cytoskeleton;intracellular non-membrane-bounded organelle;intracellular organelle;intracellular organelle part;intracellular part;macromolecular complex;membrane;neurofilament cytoskeleton;non-membrane-bounded org…				62	62	62	62	62	62	62	62	6.41216	0.00357895	3.12766	9.39375	O15061	O15061	O15061	SYNEM_HUMAN	>sp|O15061|SYNEM_HUMAN Synemin OS=Homo sapiens OX=9606 GN=SYNM PE=1 SV=3
MED27	Mediator of RNA polymerase II transcription subunit 27	8.19921	3.03549	+	0.2644	7.07356	0.554034	8.86525	8.15056	9.4868	9.55518	8.64008	1.20114	134.696	1.46819	466.344	284.16	717.483	752.308	398.954	68.0819	558.218	8.19921	+	PD_HC	biological regulation;biosynthetic process;cellular biosynthetic process;cellular macromolecule metabolic process;cellular metabolic process;cellular nitrogen compound metabolic process;cellular process;developmental process;gene expression;macromolecule metabolic process;metabolic process;negative regulation of biological process;negative regulation of cell differentiation;negative regulation of…	protein binding transcription factor activity;transcription coactivator activity;transcription cofactor activity;transcription factor binding transcription factor activity	cell part;cytoplasm;intracellular membrane-bounded organelle;intracellular non-membrane-bounded organelle;intracellular organelle;intracellular organelle part;intracellular part;macromolecular complex;mediator complex;membrane-bounded organelle;non-membrane-bounded organelle;nuclear part;nucleolus;nucleoplasm;nucleoplasm part;nucleus;organelle;organelle part;protein complex;transcription factor c…		CRSP complex;Mediator complex;PC2 complex;SMCC complex;TRAP complex	REACT_116145;REACT_12627;REACT_27161	1	1	1	1	1	1	1	1	1.11189	0.0072809	4.76884	1.95472	Q6P2C8	Q6P2C8	Q6P2C8	MED27_HUMAN	>sp|Q6P2C8|MED27_HUMAN Mediator of RNA polymerase II transcription subunit 27 OS=Homo sapiens OX=9606 GN=MED27 PE=1 SV=1
ZMYND10	Zinc finger MYND domain-containing protein 10	8.152	3.02715	+	11.9362	11.9631	12.6391	12.5118	15.2454	17.201	15.2423	15.3343	3918.81	3992.56	6378.94	5840.19	38843.9	150667	38760.5	41312.8	4916.38	40078.3	8.152	+	PD_HC		binding;cation binding;ion binding;metal ion binding	cell part;centriolar satellite;cytoplasm;cytoplasmic part;cytoskeletal part;intracellular organelle part;intracellular part;microtubule organizing center part;organelle part				5	5	5	5	5	5	5	5	3.29629	0.000450331	3.4932	4.88129	O75800	O75800	O75800	ZMY10_HUMAN	>sp|O75800|ZMY10_HUMAN Zinc finger MYND domain-containing protein 10 OS=Homo sapiens OX=9606 GN=ZMYND10 PE=1 SV=2
ITPKB	Inositol-trisphosphate 3-kinase B	8.0214	3.00385	+	11.4656	10.6606	9.33422	10.028	13.3352	13.4284	13.4445	13.2791	2828.07	1618.68	645.476	1044.07	10334.6	11024.3	11148	9940.48	1331.37	10679.5	8.0214	+	PD_HC	biological regulation;cell surface receptor linked signaling pathway;cellular process;cellular response to stimulus;immune system process;inositol phosphate metabolic process;intracellular protein kinase cascade;intracellular signal transduction;MAPKKK cascade;metabolic process;organophosphate metabolic process;positive regulation of alpha-beta T cell activation;positive regulation of alpha-beta …	adenyl nucleotide binding;adenyl ribonucleotide binding;ATP binding;binding;catalytic activity;inositol or phosphatidylinositol kinase activity;inositol trisphosphate 3-kinase activity;inositol trisphosphate kinase activity;kinase activity;nucleotide binding;phosphotransferase activity, alcohol group as acceptor;purine nucleotide binding;purine ribonucleoside triphosphate binding;purine ribonucle…	cell part;cytoplasmic part;cytosol;intracellular part	Calcium signaling pathway;Inositol phosphate metabolism;Phosphatidylinositol signaling system		REACT_150312	9	9	9	9	9	9	9	9	3.22872	0.000371585	2.9997	4.57419	P27987	P27987	P27987	IP3KB_HUMAN	>sp|P27987|IP3KB_HUMAN Inositol-trisphosphate 3-kinase B OS=Homo sapiens OX=9606 GN=ITPKB PE=1 SV=5
MMP17	Matrix metalloproteinase-17	7.78414	2.96054	+	9.81199	1.74417	6.85471	9.99748	12.1634	12.0575	11.8279	11.8201	898.883	3.35002	115.737	1022.21	4587.21	4262.55	3635.4	3615.8	507.31	3948.98	7.78414	+	PD_HC	biological regulation;positive regulation of catalytic activity;positive regulation of molecular function;regulation of biological process;regulation of catalytic activity;regulation of metabolic process;regulation of molecular function	binding;calcium ion binding;catalytic activity;cation binding;endopeptidase activity;enzyme activator activity;enzyme regulator activity;hydrolase activity;ion binding;metal ion binding;metalloendopeptidase activity;metallopeptidase activity;peptidase activity;peptidase activity, acting on L-amino acid peptides;transition metal ion binding;zinc ion binding	anchored to membrane;cell part;extracellular matrix;extracellular region part;integral to membrane;integral to plasma membrane;intrinsic to membrane;intrinsic to plasma membrane;membrane part;plasma membrane part;proteinaceous extracellular matrix			REACT_118682	3	3	3	3	3	3	3	3	1.34641	0.00328317	4.86515	2.28679	Q9ULZ9	Q9ULZ9	Q9ULZ9	MMP17_HUMAN	>sp|Q9ULZ9|MMP17_HUMAN Matrix metalloproteinase-17 OS=Homo sapiens OX=9606 GN=MMP17 PE=1 SV=4
OGFOD3	2-oxoglutarate and iron-dependent oxygenase domain-containing protein 3	7.24477	2.85694	+	0.288789	9.52609	8.81036	9.16028	12.0465	11.4912	11.6291	12.2384	1.22161	737.291	448.934	572.162	4230.17	2878.7	3167.44	4831.98	510.548	3698.8	7.24477	+	PD_HC		binding;carboxylic acid binding;catalytic activity;cation binding;ion binding;iron ion binding;L-ascorbic acid binding;metal ion binding;oxidoreductase activity;oxidoreductase activity, acting on paired donors, with incorporation or reduction of molecular oxygen;oxidoreductase activity, acting on paired donors, with incorporation or reduction of molecular oxygen, 2-oxoglutarate as one donor, and …	cell part;extracellular membrane-bounded organelle;extracellular organelle;extracellular region part;extracellular vesicular exosome;integral to membrane;intrinsic to membrane;membrane;membrane part;membrane-bounded organelle;membrane-bounded vesicle;organelle;vesicle				1	1	1	1	1	1	1	1	1.15346	0.00637855	4.90491	2.01776	Q6PK18	Q6PK18	Q6PK18	OGFD3_HUMAN	>sp|Q6PK18|OGFD3_HUMAN 2-oxoglutarate and iron-dependent oxygenase domain-containing protein 3 OS=Homo sapiens OX=9606 GN=OGFOD3 PE=1 SV=2
GNG11	Guanine nucleotide-binding protein G(I)/G(S)/G(O) subunit gamma-11	7.11305	2.83047	+	12.6121	7.9663	6.58001	5.4977	10.3446	10.2758	10.2523	10.1612	6260.66	250.089	95.671	45.1827	1300.27	1239.72	1219.69	1145.05	172.88	1229.71	7.11305	+	PD_HC	biological regulation;cell surface receptor linked signaling pathway;cellular metabolic process;cellular process;cellular response to chemical stimulus;cellular response to endogenous stimulus;cellular response to glucagon stimulus;cellular response to hormone stimulus;cellular response to organic substance;cellular response to peptide hormone stimulus;cellular response to stimulus;energy derivat…	catalytic activity;GTPase activity;hydrolase activity;hydrolase activity, acting on acid anhydrides;hydrolase activity, acting on acid anhydrides, in phosphorus-containing anhydrides;molecular transducer activity;nucleoside-triphosphatase activity;pyrophosphatase activity;signal transducer activity	cell part;extrinsic to internal side of plasma membrane;extrinsic to membrane;extrinsic to plasma membrane;heterotrimeric G-protein complex;intracellular part;macromolecular complex;membrane;membrane part;plasma membrane;plasma membrane part;protein complex	Chemokine signaling pathway		REACT_15457;REACT_1665;REACT_18274;REACT_18283;REACT_18339;REACT_18377;REACT_18407;REACT_19140;REACT_19145;REACT_19231;REACT_19290;REACT_19327;REACT_19333;REACT_20647;REACT_20653;REACT_21254;REACT_21384;REACT_23946;REACT_24023;REACT_263982	2	2	2	2	2	2	2	2	0.638723	0.0443405	2.09445	1.18542	P61952	P61952	P61952	GBG11_HUMAN	>sp|P61952|GBG11_HUMAN Guanine nucleotide-binding protein G(I)/G(S)/G(O) subunit gamma-11 OS=Homo sapiens OX=9606 GN=GNG11 PE=1 SV=1
SULF1	Extracellular sulfatase Sulf-1	7.04968	2.81756	+	12.1755	11.7065	12.165	11.7794	15.0355	14.7569	14.8469	14.7147	4625.84	3342.01	4592.3	3515.22	33584.3	27686.6	29468.8	26888.5	4053.76	28577.7	7.04968	+	PD_HC	anatomical structure development;apoptosis;biological regulation;bone development;cartilage development;cell death;cell development;cell surface receptor linked signaling pathway;cellular component organization;cellular component organization at cellular level;cellular component organization or biogenesis;cellular component organization or biogenesis at cellular level;cellular developmental proce…	arylsulfatase activity;binding;calcium ion binding;catalytic activity;cation binding;hydrolase activity;hydrolase activity, acting on ester bonds;ion binding;metal ion binding;N-acetylglucosamine-6-sulfatase activity;sulfuric ester hydrolase activity	cell part;cell surface;cytoplasmic part;endoplasmic reticulum;extracellular region part;extracellular space;Golgi apparatus;Golgi apparatus part;Golgi stack;intracellular membrane-bounded organelle;intracellular organelle;intracellular organelle part;intracellular part;membrane;membrane part;membrane raft;membrane-bounded organelle;organelle;organelle part;plasma membrane				18	18	18	18	18	18	18	18	6.00951	0.00251852	2.8819	8.39664	Q8IWU6	Q8IWU6	Q8IWU6	SULF1_HUMAN	>sp|Q8IWU6|SULF1_HUMAN Extracellular sulfatase Sulf-1 OS=Homo sapiens OX=9606 GN=SULF1 PE=1 SV=1
GAB1	GRB2-associated-binding protein 1	6.77709	2.76067	+	11.5786	11.1717	10.0894	10.8431	13.7124	13.8562	13.8396	13.5585	3058.48	2306.84	1089.46	1836.95	13422.8	14829.7	14660	12064.7	2071.9	14041.4	6.77709	+	PD_HC	activation of JUN kinase activity;activation of MAPK activity;anatomical structure development;biological regulation;cell proliferation;cell surface receptor linked signaling pathway;cellular macromolecule metabolic process;cellular metabolic process;cellular process;cellular protein metabolic process;cellular response to chemical stimulus;cellular response to cytokine stimulus;cellular response …	binding;binding, bridging;molecular transducer activity;protein binding;protein binding, bridging;SH3/SH2 adaptor activity;signal transducer activity;signaling adaptor activity	cell part;cytoplasmic part;cytosol;intracellular part	Bacterial invasion of epithelial cells;ErbB signaling pathway;Neurotrophin signaling pathway;Renal cell carcinoma	SHC3-GAB1 complex	REACT_115852;REACT_116008;REACT_12578;REACT_147727;REACT_267817;REACT_355160;REACT_355202;REACT_355221;REACT_355304;REACT_355313;REACT_355450;REACT_355511;REACT_355552;REACT_75829;REACT_976	9	9	9	9	9	9	9	9	3.90617	0.000653846	2.82099	5.39642	Q13480	Q13480	Q13480	GAB1_HUMAN	>sp|Q13480|GAB1_HUMAN GRB2-associated-binding protein 1 OS=Homo sapiens OX=9606 GN=GAB1 PE=1 SV=2
IL13RA2	Interleukin-13 receptor subunit alpha-2	6.31786	2.65944	+	10.4727	9.21881	10.1243	7.82258	12.7371	12.2832	12.2977	12.4972	1421.01	595.852	1116.14	226.376	6827.3	4984.39	5034.73	5781.39	855.995	5408.06	6.31786	+	PD_HC	biological regulation;cell surface receptor linked signaling pathway;cellular process;cellular response to chemical stimulus;cellular response to cytokine stimulus;cellular response to organic substance;cellular response to stimulus;cytokine-mediated signaling pathway;regulation of biological process;regulation of cellular process;response to chemical stimulus;response to cytokine stimulus;respon…	binding;cytokine binding;cytokine receptor activity;molecular transducer activity;protein binding;receptor activity;signal transducer activity;signaling receptor activity;transmembrane signaling receptor activity	cell part;extracellular region part;extracellular space;integral to membrane;intrinsic to membrane;membrane part	Jak-STAT signaling pathway			8	8	8	8	8	8	8	8	2.63919	0.000726115	3.04419	3.8014	Q14627	Q14627	Q14627	I13R2_HUMAN	>sp|Q14627|I13R2_HUMAN Interleukin-13 receptor subunit alpha-2 OS=Homo sapiens OX=9606 GN=IL13RA2 PE=1 SV=1
CRYAB	Alpha-crystallin B chain	6.19766	2.63172	+	13.4645	13.3831	12.4832	12.6706	15.7994	15.5778	15.8742	15.5978	11303.6	10683.5	5725.56	6519.75	57028.7	48908.6	60063.5	49591.3	8601.63	53310	6.19766	+	PD_HC	aging;anatomical structure development;apoptosis;apoptosis involved in morphogenesis;biological regulation;cell death;cellular component assembly;cellular component assembly at cellular level;cellular component organization;cellular component organization at cellular level;cellular component organization or biogenesis;cellular component organization or biogenesis at cellular level;cellular develo…	binding;cation binding;identical protein binding;ion binding;metal ion binding;protein binding;protein dimerization activity;protein homodimerization activity;structural constituent of eye lens;structural molecule activity;unfolded protein binding	actin filament bundle;cell part;cell surface;contractile fiber part;cytoplasm;cytoplasmic part;cytoskeletal part;cytoskeleton;cytosol;extracellular membrane-bounded organelle;extracellular organelle;extracellular region part;extracellular vesicular exosome;Golgi apparatus;intracellular membrane-bounded organelle;intracellular non-membrane-bounded organelle;intracellular organelle;intracellular or…	Protein processing in endoplasmic reticulum			9	9	9	9	9	9	9	9	4.35432	0.00085	2.71194	5.91234	P02511	P02511	P02511	CRYAB_HUMAN	>sp|P02511|CRYAB_HUMAN Alpha-crystallin B chain OS=Homo sapiens OX=9606 GN=CRYAB PE=1 SV=2
DIP2A	Disco-interacting protein 2 homolog A	6.00103	2.58521	+	15.5023	14.7116	14.6516	17.0944	17.4478	17.7522	17.961	17.7391	46414.9	26830.8	25737.8	139935	178777	220772	255152	218777	36622.8	219775	6.00103	+	PD_HC	biological regulation;developmental process;multicellular organismal development;multicellular organismal process;negative regulation of biological process;negative regulation of gene expression;negative regulation of macromolecule metabolic process;negative regulation of metabolic process;regulation of apoptosis;regulation of biological process;regulation of cell death;regulation of cellular pro…	catalytic activity	cell part;cell surface;intracellular membrane-bounded organelle;intracellular organelle;intracellular part;membrane-bounded organelle;nucleus;organelle				1	1	1	1	1	1	1	1	2.07932	0.0017189	2.23506	2.87083	Q14689	Q14689	Q14689	DIP2A_HUMAN	>sp|Q14689|DIP2A_HUMAN Disco-interacting protein 2 homolog A OS=Homo sapiens OX=9606 GN=DIP2A PE=1 SV=2
NOS1AP	Carboxyl-terminal PDZ ligand of neuronal nitric oxide synthase protein	5.99788	2.58445	+	11.4272	11.2014	10.9008	11.0142	13.7283	13.6615	13.806	13.4809	2753.78	2354.82	1911.91	2068.26	13571.6	12957.5	14322.5	11432.9	2211.54	13264.5	5.99788	+	PD_HC	biological regulation;cellular chemical homeostasis;cellular homeostasis;cellular ion homeostasis;cellular process;chemical homeostasis;homeostatic process;ion homeostasis;positive regulation of biological process;positive regulation of biosynthetic process;positive regulation of catalytic activity;positive regulation of cell communication;positive regulation of cellular biosynthetic process;posi…	binding;enzyme binding;nitric-oxide synthase binding;protein binding	cell part;contractile fiber part;cytoplasmic part;cytosol;endoplasmic reticulum membrane;endoplasmic reticulum part;intracellular membrane-bounded organelle;intracellular organelle;intracellular organelle part;intracellular part;membrane;membrane part;membrane-bounded organelle;mitochondrion;nucleus;organelle;organelle membrane;organelle part;perinuclear region of cytoplasm;sarcoplasmic reticulum…				9	9	9	9	9	9	9	9	5.8402	0.00165854	2.53331	7.57411	O75052	O75052	O75052	CAPON_HUMAN	>sp|O75052|CAPON_HUMAN Carboxyl-terminal PDZ ligand of neuronal nitric oxide synthase protein OS=Homo sapiens OX=9606 GN=NOS1AP PE=1 SV=3
GPD1	Glycerol-3-phosphate dehydrogenase [NAD(+)], cytoplasmic	5.92675	2.56724	+	12.5204	8.38409	6.73723	8.6874	11.4754	11.3052	10.8864	10.1639	5875.11	334.089	106.686	412.257	2847.34	2530.49	1892.92	1147.2	373.173	2211.71	5.92675	+	PD_HC	acylglycerol biosynthetic process;acylglycerol metabolic process;alcohol biosynthetic process;alcohol catabolic process;alcohol metabolic process;alditol catabolic process;alditol metabolic process;biological regulation;biosynthetic process;carbohydrate biosynthetic process;carbohydrate catabolic process;carbohydrate metabolic process;carboxylic acid biosynthetic process;carboxylic acid metabolic…	binding;catalytic activity;coenzyme binding;cofactor binding;glycerol-3-phosphate dehydrogenase [NAD+] activity;glycerol-3-phosphate dehydrogenase activity;NAD binding;nucleotide binding;oxidoreductase activity;oxidoreductase activity, acting on CH-OH group of donors;oxidoreductase activity, acting on the CH-OH group of donors, NAD or NADP as acceptor;oxidoreductase activity, acting on the CH-OH …	cell part;cytoplasmic part;cytosol;extracellular membrane-bounded organelle;extracellular organelle;extracellular region part;extracellular vesicular exosome;glycerol-3-phosphate dehydrogenase complex;intracellular membrane-bounded organelle;intracellular organelle;intracellular part;macromolecular complex;membrane-bounded organelle;membrane-bounded vesicle;mitochondrion;organelle;protein complex…	Glycerophospholipid metabolism		REACT_1190;REACT_120906	2	2	2	2	2	2	2	2	0.729178	0.0358427	1.87546	1.28643	P21695	P21695	P21695	GPDA_HUMAN	>sp|P21695|GPDA_HUMAN Glycerol-3-phosphate dehydrogenase [NAD(+)], cytoplasmic OS=Homo sapiens OX=9606 GN=GPD1 PE=1 SV=4
PDGFC	Platelet-derived growth factor C	5.80116	2.53634	+	9.68187	9.35523	8.45483	8.86108	11.8671	11.9564	11.4312	11.1475	821.359	654.945	350.879	464.998	3735.54	3974.07	2761.43	2268.46	559.971	3248.48	5.80116	+	PD_HC	activation of protein kinase activity;activation of transmembrane receptor protein tyrosine kinase activity;anatomical structure development;anatomical structure morphogenesis;biological regulation;cell surface receptor linked signaling pathway;cellular component assembly;cellular component assembly at cellular level;cellular component organization;cellular component organization at cellular leve…	binding;growth factor receptor binding;identical protein binding;platelet-derived growth factor receptor binding;protein binding;protein dimerization activity;protein homodimerization activity;receptor binding	cell part;cell surface;cytoplasm;cytoplasmic part;endoplasmic reticulum lumen;endoplasmic reticulum part;extracellular membrane-bounded organelle;extracellular organelle;extracellular region;extracellular region part;extracellular space;extracellular vesicular exosome;Golgi apparatus part;Golgi membrane;intracellular membrane-bounded organelle;intracellular organelle;intracellular organelle lumen…	Cytokine-cytokine receptor interaction;Focal adhesion;Gap junction;Melanoma;Prostate cancer;Regulation of actin cytoskeleton		REACT_16888	1	1	1	1	1	1	1	1	3.57127	0.0004	2.5123	4.7387	Q9NRA1	Q9NRA1	Q9NRA1	PDGFC_HUMAN	>sp|Q9NRA1|PDGFC_HUMAN Platelet-derived growth factor C OS=Homo sapiens OX=9606 GN=PDGFC PE=1 SV=2
PALMD	Palmdelphin	5.71158	2.51389	+	10.0751	8.26524	9.81333	9.64663	12.2375	12.2933	12.255	11.9945	1078.72	307.67	899.719	801.54	4828.97	5019.4	4887.9	4080.41	850.629	4858.44	5.71158	+	PD_HC	biological regulation;regulation of anatomical structure morphogenesis;regulation of biological process;regulation of biological quality;regulation of cell morphogenesis;regulation of cell shape;regulation of cellular component organization;regulation of cellular process;regulation of developmental process		cell part;cell projection;cell projection part;cytoplasm;dendritic spine;intracellular part;membrane;neuron projection;neuron spine				9	9	9	9	9	9	9	9	3.26686	0.000361702	2.74499	4.49763	Q9NP74	Q9NP74	Q9NP74	PALMD_HUMAN	>sp|Q9NP74|PALMD_HUMAN Palmdelphin OS=Homo sapiens OX=9606 GN=PALMD PE=1 SV=1
ALDH4A1	Delta-1-pyrroline-5-carboxylate dehydrogenase, mitochondrial	5.68395	2.50689	+	14.426	14.5095	14.5103	14.5139	17.048	16.7426	16.9849	17.0584	22012	23323.6	23336.5	23394.8	135506	109654	129707	136487	23330	132607	5.68395	+	PD_HC	4-hydroxyproline catabolic process;4-hydroxyproline metabolic process;amine biosynthetic process;amine catabolic process;amine metabolic process;biosynthetic process;carboxylic acid biosynthetic process;carboxylic acid catabolic process;carboxylic acid metabolic process;catabolic process;cellular amine metabolic process;cellular amino acid biosynthetic process;cellular amino acid catabolic proces…	1-pyrroline-5-carboxylate dehydrogenase activity;aldehyde dehydrogenase (NAD) activity;binding;catalytic activity;electron carrier activity;identical protein binding;oxidoreductase activity;oxidoreductase activity, acting on the aldehyde or oxo group of donors;oxidoreductase activity, acting on the aldehyde or oxo group of donors, NAD or NADP as acceptor;oxidoreductase activity, acting on the CH-…	cell part;cytoplasmic part;intracellular organelle lumen;intracellular organelle part;intracellular part;membrane-enclosed lumen;mitochondrial matrix;mitochondrial part;organelle lumen;organelle part	Alanine, aspartate and glutamate metabolism;Arginine and proline metabolism		REACT_1002	28	28	28	28	28	28	28	28	7.2205	0.00295652	2.46855	8.91886	P30038	P30038	P30038	AL4A1_HUMAN	>sp|P30038|AL4A1_HUMAN Delta-1-pyrroline-5-carboxylate dehydrogenase, mitochondrial OS=Homo sapiens OX=9606 GN=ALDH4A1 PE=1 SV=3
SPARCL1	SPARC-like protein 1	5.49151	2.4572	+	9.70016	9.40075	10.9451	10.625	12.6364	12.8558	12.7468	11.9605	831.839	675.939	1971.53	1579.22	6367.01	7412.79	6873.36	3985.38	1205.53	6620.18	5.49151	+	PD_HC	biological regulation;cellular process;cellular response to stimulus;regulation of biological process;regulation of cellular process;response to stimulus;signal transduction	binding;calcium ion binding;cation binding;ion binding;metal ion binding	extracellular matrix;extracellular membrane-bounded organelle;extracellular organelle;extracellular region part;extracellular space;extracellular vesicular exosome;membrane-bounded organelle;membrane-bounded vesicle;organelle;proteinaceous extracellular matrix;vesicle				4	4	4	4	4	4	4	4	2.89335	0.000752475	2.38214	3.8479	Q14515	Q14515	Q14515	SPRL1_HUMAN	>sp|Q14515|SPRL1_HUMAN SPARC-like protein 1 OS=Homo sapiens OX=9606 GN=SPARCL1 PE=1 SV=2
EFHD1	EF-hand domain-containing protein D1	5.4777	2.45357	+	7.52148	9.97958	5.10085	5.0813	10.0118	9.23166	9.21247	9.0639	183.735	1009.61	34.317	33.8551	1032.41	601.183	593.239	535.187	109.026	597.211	5.4777	+	PD_HC	cell projection organization;cellular component organization;cellular component organization at cellular level;cellular component organization or biogenesis;cellular component organization or biogenesis at cellular level;cellular process;neuron projection development	binding;calcium ion binding;cation binding;ion binding;metal ion binding	cell part;cytoplasmic part;extracellular membrane-bounded organelle;extracellular organelle;extracellular region part;extracellular vesicular exosome;intracellular organelle part;intracellular part;membrane;membrane-bounded organelle;membrane-bounded vesicle;mitochondrial inner membrane;mitochondrial membrane;mitochondrial part;organelle;organelle inner membrane;organelle membrane;organelle part;…				2	2	2	2	2	2	2	2	1.07534	0.0112626	2.45915	1.77056	Q9BUP0	Q9BUP0	Q9BUP0	EFHD1_HUMAN	>sp|Q9BUP0|EFHD1_HUMAN EF-hand domain-containing protein D1 OS=Homo sapiens OX=9606 GN=EFHD1 PE=1 SV=1
PODXL	Podocalyxin	5.30809	2.40819	+	16.2028	13.5377	13.1584	13.1045	15.6436	15.7938	15.7431	15.9367	75427.3	11892	9142.67	8807.4	51190.9	56807.7	54846	62722.7	10517.3	55826.9	5.30809	+	PD_HC	anatomical structure development;anatomical structure formation involved in morphogenesis;biological adhesion;biological regulation;cell adhesion;cell development;cell migration;cell motility;cellular component movement;cellular developmental process;cellular process;developmental process;epithelial cell development;epithelial tube formation;glomerular epithelial cell development;glomerular visce…		apical plasma membrane;cell body;cell part;cell projection;cell projection membrane;cell projection part;cytoplasm;extracellular membrane-bounded organelle;extracellular organelle;extracellular region part;extracellular space;extracellular vesicular exosome;filopodium;integral to membrane;integral to plasma membrane;intracellular part;intrinsic to membrane;intrinsic to plasma membrane;lamellipodi…				7	7	7	7	7	7	7	7	1.26991	0.00875341	1.77845	1.88635	O00592	O00592	O00592	PODXL_HUMAN	>sp|O00592|PODXL_HUMAN Podocalyxin OS=Homo sapiens OX=9606 GN=PODXL PE=1 SV=2
LAMA5	Laminin subunit alpha-5	5.18709	2.37493	+	12.879	8.94977	10.1168	8.09778	12.2762	11.5877	12.1761	11.852	7532.95	494.481	1110.35	273.952	4960.26	3077.83	4627.77	3696.64	802.416	4162.2	5.18709	+	PD_HC	ameboidal cell migration;anatomical structure development;anatomical structure formation involved in morphogenesis;anatomical structure morphogenesis;angiogenesis;biological adhesion;biological regulation;branching involved in salivary gland morphogenesis;branching involved in ureteric bud morphogenesis;branching morphogenesis of a tube;cell adhesion;cell differentiation;cell junction assembly;ce…	binding;integrin binding;protein binding;protein complex binding;receptor binding;structural molecule activity	basal lamina;basement membrane;cell part;extracellular matrix;extracellular matrix part;extracellular membrane-bounded organelle;extracellular organelle;extracellular region;extracellular region part;extracellular space;extracellular vesicular exosome;intracellular membrane-bounded organelle;intracellular organelle;intracellular part;laminin complex;laminin-1 complex;laminin-10 complex;laminin-11…	Amoebiasis;ECM-receptor interaction;Focal adhesion;Pathways in cancer;Small cell lung cancer;Toxoplasmosis	ITGA6-ITGB4-LAMA5 complex;ITGA6-ITGB4-Laminin10/12 complex	REACT_118572;REACT_163874;REACT_163906;REACT_169262	8	8	8	8	8	8	8	8	0.951385	0.0177959	1.96216	1.56529	O15230	O15230	O15230	LAMA5_HUMAN	>sp|O15230|LAMA5_HUMAN Laminin subunit alpha-5 OS=Homo sapiens OX=9606 GN=LAMA5 PE=1 SV=8
MSI1	RNA-binding protein Musashi homolog 1	5.15455	2.36585	+	13.6498	12.9622	12.7375	13.171	15.4458	15.4438	15.4286	15.3371	12852.8	7980.15	6829.2	9222.87	44632.3	44570.5	44103.3	41393	8601.51	44336.9	5.15455	+	PD_HC	anatomical structure development;cell differentiation;cellular developmental process;cellular process;developmental process;epithelial cell differentiation;nervous system development;response to chemical stimulus;response to endogenous stimulus;response to hormone stimulus;response to organic substance;response to stimulus;system development	binding;nucleic acid binding;nucleotide binding;poly(U) RNA binding;poly-pyrimidine tract binding;RNA binding;single-stranded RNA binding	cell part;cytoplasm;intracellular membrane-bounded organelle;intracellular organelle;intracellular part;macromolecular complex;membrane-bounded organelle;nucleus;organelle;polysome;ribonucleoprotein complex	mRNA surveillance pathway			10	10	10	10	10	10	10	10	4.61527	0.000781609	2.28369	5.76343	O43347	O43347	O43347	MSI1H_HUMAN	>sp|O43347|MSI1H_HUMAN RNA-binding protein Musashi homolog 1 OS=Homo sapiens OX=9606 GN=MSI1 PE=1 SV=1
PEMT	Phosphatidylethanolamine N-methyltransferase	5.13954	2.36164	+	11.9047	9.19986	8.7253	6.81645	12.3454	11.708	10.855	9.16172	3834.17	588.076	423.231	112.708	5203.98	3345.49	1852.17	572.733	505.654	2598.83	5.13954	+	PD_HC	alcohol metabolic process;amine metabolic process;biosynthetic process;cell proliferation;cellular amine metabolic process;cellular biogenic amine metabolic process;cellular biosynthetic process;cellular lipid metabolic process;cellular metabolic process;cellular nitrogen compound metabolic process;cellular process;ethanolamine-containing compound metabolic process;glycerolipid biosynthetic proce…	catalytic activity;methyltransferase activity;N-methyltransferase activity;phosphatidylethanolamine N-methyltransferase activity;phosphatidyl-N-dimethylethanolamine N-methyltransferase activity;phosphatidyl-N-methylethanolamine N-methyltransferase activity;S-adenosylmethionine-dependent methyltransferase activity;transferase activity;transferase activity, transferring one-carbon groups	cell part;cytoplasmic part;endoplasmic reticulum membrane;endoplasmic reticulum part;integral to membrane;intracellular organelle part;intracellular part;intrinsic to membrane;membrane;membrane part;mitochondrial membrane;mitochondrial part;organelle membrane;organelle part	Glycerophospholipid metabolism		REACT_121238	1	1	1	1	1	1	1	1	0.721408	0.036541	1.85595	1.27481	Q9UBM1	Q9UBM1	Q9UBM1	PEMT_HUMAN	>sp|Q9UBM1|PEMT_HUMAN Phosphatidylethanolamine N-methyltransferase OS=Homo sapiens OX=9606 GN=PEMT PE=1 SV=4
SORT1	Sortilin	5.11677	2.35523	+	12.6473	11.7687	11.9483	12.2393	14.4613	14.4514	14.5151	14.2855	6415.3	3489.25	3951.82	4835	22557.2	22402.9	23414.3	19969.4	4393.41	22480.1	5.11677	+	PD_HC	biological regulation;carbohydrate transport;cell differentiation;cell surface receptor linked signaling pathway;cellular component organization;cellular component organization at cellular level;cellular component organization or biogenesis;cellular component organization or biogenesis at cellular level;cellular developmental process;cellular membrane organization;cellular process;cellular respon…	binding;enzyme binding;growth factor binding;molecular transducer activity;nerve growth factor binding;nerve growth factor receptor activity;neurotensin receptor activity, non-G-protein coupled;neurotrophin binding;neurotrophin receptor activity;protein binding;receptor activity;signal transducer activity;signaling receptor activity;transmembrane signaling receptor activity	cell part;cell surface;clathrin-coated vesicle;coated pit;coated vesicle;cytoplasmic membrane-bounded vesicle;cytoplasmic part;cytoplasmic vesicle;early endosome;endoplasmic reticulum membrane;endoplasmic reticulum part;endosomal part;endosome;endosome membrane;Golgi apparatus;Golgi apparatus part;Golgi cisterna membrane;Golgi membrane;Golgi-associated vesicle;integral to membrane;intracellular m…	Lysosome;Neurotrophin signaling pathway	SORT1-NGFR complex;SORT1-NGFR-NGFB complex	REACT_19400	11	11	11	11	11	11	11	11	4.58492	0.000747253	2.27744	5.72102	Q99523	Q99523	Q99523	SORT_HUMAN	>sp|Q99523|SORT_HUMAN Sortilin OS=Homo sapiens OX=9606 GN=SORT1 PE=1 SV=3
WIF1	Wnt inhibitory factor 1	5.08763	2.34699	+	9.81999	9.58735	8.3068	8.14514	11.5581	11.2229	11.4097	11.4534	903.882	769.272	316.662	283.095	3015.33	2390.17	2720.58	2804.25	542.967	2762.42	5.08763	+	PD_HC	biological regulation;cell surface receptor linked signaling pathway;cellular process;cellular response to stimulus;developmental process;multicellular organismal development;multicellular organismal process;negative regulation of biological process;negative regulation of canonical Wnt receptor signaling pathway;negative regulation of cell communication;negative regulation of cellular process;neg…		extracellular region	Wnt signaling pathway		REACT_264383	2	2	2	2	2	2	2	2	2.86337	0.00075	2.44621	3.84542	Q9Y5W5	Q9Y5W5	Q9Y5W5	WIF1_HUMAN	>sp|Q9Y5W5|WIF1_HUMAN Wnt inhibitory factor 1 OS=Homo sapiens OX=9606 GN=WIF1 PE=1 SV=3
CACNG5	Voltage-dependent calcium channel gamma-5 subunit	5.08022	2.34489	+	7.45088	10.0037	9.79941	9.65138	12.0088	12.1329	12.3156	11.6995	174.96	1026.63	891.079	804.183	4121.06	4491.25	5097.59	3325.83	847.631	4306.15	5.08022	+	PD_HC	biological regulation;establishment of localization;regulation of alpha-amino-3-hydroxy-5-methyl-4-isoxazole propionate selective glutamate receptor activity;regulation of biological process;regulation of cellular process;regulation of molecular function;regulation of receptor activity;regulation of response to stimulus;regulation of signal transduction;regulation of signaling;transport	calcium channel activity;cation channel activity;cation transmembrane transporter activity;channel activity;gated channel activity;ion channel activity;ion transmembrane transporter activity;passive transmembrane transporter activity;substrate-specific channel activity;substrate-specific transmembrane transporter activity;substrate-specific transporter activity;transmembrane transporter activity;…	alpha-amino-3-hydroxy-5-methyl-4-isoxazolepropionic acid selective glutamate receptor complex;cell junction;cell part;cytoskeletal part;intracellular organelle part;intracellular part;ionotropic glutamate receptor complex;macromolecular complex;membrane;membrane part;organelle part;plasma membrane part;postsynaptic density;postsynaptic membrane;protein complex;receptor complex;synapse part;synapt…	Arrhythmogenic right ventricular cardiomyopathy (ARVC);Cardiac muscle contraction;Dilated cardiomyopathy;Hypertrophic cardiomyopathy (HCM);MAPK signaling pathway			2	2	2	2	2	2	2	2	2.43742	0.000892231	2.81287	3.47211	Q9UF02	Q9UF02	Q9UF02	CCG5_HUMAN	>sp|Q9UF02|CCG5_HUMAN Voltage-dependent calcium channel gamma-5 subunit OS=Homo sapiens OX=9606 GN=CACNG5 PE=2 SV=2
DMD	Dystrophin	5.06553	2.34071	+	13.5123	14.0565	13.9912	13.8338	16.2604	16.2503	16.2756	16.11	11684.4	17038.4	16284.4	14601.2	78499.7	77952.1	79331.2	70728.3	15442.8	78225.9	5.06553	+	PD_HC	actin filament-based movement;actin filament-based process;actin-mediated cell contraction;actin-myosin filament sliding;anatomical structure development;anatomical structure homeostasis;biological regulation;biosynthetic process;calcium-mediated signaling;cardiac muscle contraction;cell development;cellular biosynthetic process;cellular component assembly;cellular component assembly at cellular …	actin binding;binding;cation binding;cytoskeletal protein binding;dystroglycan binding;enzyme binding;glycoprotein binding;ion binding;metal ion binding;myosin binding;nitric-oxide synthase binding;protein binding;structural constituent of cytoskeleton;structural constituent of muscle;structural molecule activity;transition metal ion binding;vinculin binding;zinc ion binding	cell junction;cell part;cell projection;cell projection membrane;cell projection part;cell surface;cell-substrate junction;contractile fiber part;costamere;cytoplasmic part;cytoskeleton;cytosol;dystrophin-associated glycoprotein complex;filopodium;filopodium membrane;intracellular membrane-bounded organelle;intracellular non-membrane-bounded organelle;intracellular organelle;intracellular part;ma…	Arrhythmogenic right ventricular cardiomyopathy (ARVC);Dilated cardiomyopathy;Hypertrophic cardiomyopathy (HCM);Viral myocarditis		REACT_163874;REACT_16969	11	11	11	11	11	11	11	11	5.81545	0.00147826	2.37562	7.25777	P11532	P11532	P11532	DMD_HUMAN	>sp|P11532|DMD_HUMAN Dystrophin OS=Homo sapiens OX=9606 GN=DMD PE=1 SV=3
TTC30A;TTC30B	Tetratricopeptide repeat protein 30A;Tetratricopeptide repeat protein 30B	5.03282	2.33137	+	4.71541	10.1776	8.35204	8.92464	11.0597	10.9334	11.5024	10.8395	26.2712	1158.14	326.749	485.942	2134.53	1955.61	2901.13	1832.38	406.346	2045.07	5.03282	+	PD_HC	anatomical structure formation involved in morphogenesis;cell projection assembly;cell projection organization;cellular component assembly;cellular component assembly at cellular level;cellular component assembly involved in morphogenesis;cellular component movement;cellular component organization;cellular component organization at cellular level;cellular component organization or biogenesis;cell…		axoneme part;cell part;cell projection;cell projection part;cilium;intracellular part;intraflagellar transport particle B;macromolecular complex;organelle part;primary cilium;protein complex			REACT_268024	3	3	3	3	3	3	3	3	1.37531	0.00406691	3.04132	2.20097	Q86WT1;Q8N4P2	Q86WT1;Q8N4P2	Q86WT1;Q8N4P2	TT30A_HUMAN;TT30B_HUMAN	>sp|Q86WT1|TT30A_HUMAN Tetratricopeptide repeat protein 30A OS=Homo sapiens OX=9606 GN=TTC30A PE=2 SV=3;>sp|Q8N4P2|TT30B_HUMAN Tetratricopeptide repeat protein 30B OS=Homo sapiens OX=9606 GN=TTC30B PE=1 SV=2
MEGF10	Multiple epidermal growth factor-like domains protein 10	4.83594	2.2738	+	7.30003	10.0248	7.97061	9.59759	11.1594	11.3779	11.2662	11.2858	157.59	1041.75	250.838	774.752	2287.25	2661.27	2463	2496.69	512.795	2479.84	4.83594	+	PD_HC	anatomical structure development;biological adhesion;biological regulation;cell activation;cell adhesion;cell development;cell differentiation;cell proliferation;cell recognition;cell-cell adhesion;cellular developmental process;cellular process;developmental process;homotypic cell-cell adhesion;muscle cell development;phagocytosis, recognition;recognition of apoptotic cell;regulation of biologic…		basolateral plasma membrane;cell part;cell projection;integral to membrane;intrinsic to membrane;membrane part;phagocytic cup;plasma membrane part				1	1	1	1	1	1	1	1	2.10772	0.0014711	2.54908	2.99786	Q96KG7	Q96KG7	Q96KG7	MEG10_HUMAN	>sp|Q96KG7|MEG10_HUMAN Multiple epidermal growth factor-like domains protein 10 OS=Homo sapiens OX=9606 GN=MEGF10 PE=1 SV=1
STON1	Stonin-1	4.82355	2.2701	+	11.4071	10.255	10.343	10.4615	12.5557	12.6132	12.9066	12.7315	2715.68	1221.98	1298.83	1410.02	6020.64	6265.44	7678.45	6800.85	1354.43	6533.15	4.82355	+	PD_HC	biological regulation;cellular component organization;cellular component organization or biogenesis;cellular membrane organization;cellular process;endocytosis;establishment of localization;establishment of localization in cell;establishment of protein localization;intracellular protein transport;intracellular transport;membrane invagination;membrane organization;protein transport;regulation of b…		AP-type membrane coat adaptor complex;cell part;clathrin adaptor complex;cytoplasmic part;intracellular part;macromolecular complex;membrane part;protein complex				6	6	6	6	6	6	6	6	3.53786	0.00032381	2.08506	4.36316	Q9Y6Q2	Q9Y6Q2	Q9Y6Q2	STON1_HUMAN	>sp|Q9Y6Q2|STON1_HUMAN Stonin-1 OS=Homo sapiens OX=9606 GN=STON1 PE=1 SV=2
GLUL	Glutamine synthetase	4.78688	2.25909	+	13.7407	13.1229	13.0175	13.0517	15.3552	15.3384	15.5083	15.1757	13688.7	8920.45	8291.97	8490.89	41915.6	41430.3	46608.3	37011.9	8705.67	41673	4.78688	+	PD_HC	amine biosynthetic process;amine catabolic process;amine metabolic process;biological regulation;biosynthetic process;carboxylic acid biosynthetic process;carboxylic acid catabolic process;carboxylic acid metabolic process;catabolic process;cell communication;cell proliferation;cell-cell signaling;cellular amine metabolic process;cellular amino acid biosynthetic process;cellular amino acid catabo…	acid-ammonia (or amide) ligase activity;adenyl nucleotide binding;adenyl ribonucleotide binding;amine binding;amino acid binding;ammonia ligase activity;ATP binding;binding;carbon-carbon lyase activity;carboxylic acid binding;carboxy-lyase activity;catalytic activity;cation binding;glutamate binding;glutamate decarboxylase activity;glutamate-ammonia ligase activity;identical protein binding;ion b…	axon part;axon terminus;cell part;cell projection part;cytoplasm;cytoplasmic part;cytosol;endoplasmic reticulum;extracellular membrane-bounded organelle;extracellular organelle;extracellular region part;extracellular vesicular exosome;intracellular membrane-bounded organelle;intracellular organelle;intracellular part;macromolecular complex;membrane-bounded organelle;membrane-bounded vesicle;mitoc…	Alanine, aspartate and glutamate metabolism;Arginine and proline metabolism;Nitrogen metabolism;Two-component system		REACT_13639;REACT_238	10	10	10	10	10	10	10	10	4.58474	0.000693878	2.11119	5.50309	P15104	P15104	P15104	GLNA_HUMAN	>sp|P15104|GLNA_HUMAN Glutamine synthetase OS=Homo sapiens OX=9606 GN=GLUL PE=1 SV=4
EBF2	Transcription factor COE2	4.70499	2.23419	+	11.3017	11.7959	12.3013	11.9291	14.4377	13.7094	14.4042	13.6579	2524.36	3555.66	5047.31	3899.57	22191.2	13394.9	21681.8	12925.2	3727.61	17538.4	4.70499	+	PD_HC	adipose tissue development;anatomical structure development;biological regulation;biosynthetic process;brown fat cell differentiation;cell differentiation;cell fate determination;cellular biosynthetic process;cellular developmental process;cellular macromolecule biosynthetic process;cellular macromolecule metabolic process;cellular metabolic process;cellular nitrogen compound metabolic process;ce…	binding;cation binding;chromatin binding;DNA binding;ion binding;metal ion binding;nucleic acid binding	cell part;intracellular membrane-bounded organelle;intracellular organelle;intracellular part;membrane-bounded organelle;nucleus;organelle				1	1	1	1	1	1	1	1	3.52985	0.000354167	2.22025	4.46828	Q9HAK2	Q9HAK2	Q9HAK2	COE2_HUMAN	>sp|Q9HAK2|COE2_HUMAN Transcription factor COE2 OS=Homo sapiens OX=9606 GN=EBF2 PE=1 SV=4
CELSR2	Cadherin EGF LAG seven-pass G-type receptor 2	4.69016	2.22964	+	13.5764	13.9303	13.6974	13.3265	15.8935	15.8851	15.8503	15.7987	12215.3	15611.3	13284	10272.5	60872.4	60519	59076.6	57001	12749.6	59797.8	4.69016	+	PD_HC	anatomical structure development;anatomical structure formation involved in morphogenesis;anatomical structure morphogenesis;biological adhesion;biological regulation;body fluid secretion;cell adhesion;cell migration;cell motility;cell part morphogenesis;cell projection assembly;cell projection morphogenesis;cell projection organization;cell surface receptor linked signaling pathway;cell-cell adh…	binding;calcium ion binding;cation binding;G-protein coupled receptor activity;ion binding;metal ion binding;molecular transducer activity;receptor activity;signal transducer activity;signaling receptor activity;transmembrane signaling receptor activity	cell part;cytoplasm;integral to membrane;intracellular part;intrinsic to membrane;membrane;membrane part;plasma membrane				21	21	21	21	21	21	21	21	5.64185	0.00121429	2.22422	6.79037	Q9HCU4	Q9HCU4	Q9HCU4	CELR2_HUMAN	>sp|Q9HCU4|CELR2_HUMAN Cadherin EGF LAG seven-pass G-type receptor 2 OS=Homo sapiens OX=9606 GN=CELSR2 PE=1 SV=1
ENGASE	Cytosolic endo-beta-N-acetylglucosaminidase	4.68649	2.22851	+	10.6263	0.700077	10.2589	0.751733	11.2301	11.3717	11.6296	11.5982	1580.65	1.62459	1225.28	1.68381	2402.13	2649.86	3168.53	3100.32	613.484	2875.09	4.68649	+	PD_HC		catalytic activity;hydrolase activity;hydrolase activity, acting on glycosyl bonds;hydrolase activity, hydrolyzing O-glycosyl compounds;mannosyl-glycoprotein endo-beta-N-acetylglucosaminidase activity	cell part;cytoplasmic part;cytosol;intracellular part	Other glycan degradation			1	1	1	1	1	1	1	1	1.08945	0.00727001	5.87316	1.95278	Q8NFI3	Q8NFI3	Q8NFI3	ENASE_HUMAN	>sp|Q8NFI3|ENASE_HUMAN Cytosolic endo-beta-N-acetylglucosaminidase OS=Homo sapiens OX=9606 GN=ENGASE PE=1 SV=1
DIO3	Thyroxine 5-deiodinase	4.63857	2.21368	+	9.88352	0.58992	9.26521	9.81008	11.4148	12.1734	12.0661	11.0473	944.574	1.50516	615.327	897.694	2730.22	4619.11	4288.03	2116.26	756.511	3509.12	4.63857	+	PD_HC	alcohol catabolic process;alcohol metabolic process;amine catabolic process;amine metabolic process;aromatic compound catabolic process;benzene-containing compound metabolic process;biological regulation;biosynthetic process;carboxylic acid catabolic process;carboxylic acid metabolic process;catabolic process;cellular amine metabolic process;cellular amino acid catabolic process;cellular amino ac…	catalytic activity;oxidoreductase activity;thyroxine 5'-deiodinase activity;thyroxine 5-deiodinase activity	cell part;cytoplasmic part;endosomal part;endosome membrane;integral to membrane;intracellular organelle part;intracellular part;intrinsic to membrane;membrane;membrane part;organelle membrane;organelle part;plasma membrane			REACT_15297	1	1	1	1	1	1	1	1	0.959588	0.0123948	4.28819	1.72512	P55073	P55073	P55073	IOD3_HUMAN	>sp|P55073|IOD3_HUMAN Thyroxine 5-deiodinase OS=Homo sapiens OX=9606 GN=DIO3 PE=1 SV=4
NQO1	NAD(P)H dehydrogenase [quinone] 1	4.61968	2.20779	+	14.1295	13.6976	13.6619	13.4788	15.8357	15.9049	15.9992	15.8702	17922.7	13285.8	12961.1	11416.2	58481.8	61355.3	65499.7	59897.2	13123.5	60626.2	4.61968	+	PD_HC	aging;biological regulation;biosynthetic process;cell communication;cell-cell signaling;cellular biosynthetic process;cellular metabolic process;cellular nitrogen compound biosynthetic process;cellular nitrogen compound metabolic process;cellular process;developmental process;metabolic process;negative regulation of catalytic activity;negative regulation of molecular function;nitric oxide biosynt…	antioxidant activity;binding;catalytic activity;cytochrome-b5 reductase activity;identical protein binding;NAD(P)H dehydrogenase (quinone) activity;oxidoreductase activity;oxidoreductase activity, acting on NADH or NADPH;oxidoreductase activity, acting on NADH or NADPH, heme protein as acceptor;oxidoreductase activity, acting on NADH or NADPH, quinone or similar compound as acceptor;oxidoreductas…	cell body;cell part;cytoplasm;cytoplasmic part;cytosol;extracellular membrane-bounded organelle;extracellular organelle;extracellular region part;extracellular vesicular exosome;intracellular part;membrane-bounded organelle;membrane-bounded vesicle;neuronal cell body;organelle;vesicle			REACT_13565	11	11	11	11	11	11	11	11	5.28985	0.001	2.16055	6.31361	P15559	P15559	P15559	NQO1_HUMAN	>sp|P15559|NQO1_HUMAN NAD(P)H dehydrogenase [quinone] 1 OS=Homo sapiens OX=9606 GN=NQO1 PE=1 SV=1
NELL2	Protein kinase C-binding protein NELL2	4.56625	2.19101	+	8.25447	3.22856	9.6989	9.9461	11.045	11.3568	11.3258	11.3678	305.382	9.37332	831.113	986.449	2112.89	2622.63	2566.88	2642.71	568.247	2594.76	4.56625	+	PD_HC	anatomical structure homeostasis;biological regulation;cellular homeostasis;cellular process;homeostatic process;neuron homeostasis;regulation of biological quality	binding;calcium ion binding;cation binding;ion binding;metal ion binding	extracellular region				3	3	3	3	3	3	3	3	1.17304	0.00676147	3.49184	1.97853	Q99435	Q99435	Q99435	NELL2_HUMAN	>sp|Q99435|NELL2_HUMAN Protein kinase C-binding protein NELL2 OS=Homo sapiens OX=9606 GN=NELL2 PE=1 SV=1
LRRC14	Leucine-rich repeat-containing protein 14	4.55288	2.18678	+	9.88174	0.635227	9.33076	6.9377	9.15581	10.8132	10.7638	10.7741	943.409	1.55318	643.93	122.59	570.392	1799.28	1738.71	1751.17	383.26	1744.94	4.55288	+	PD_HC							1	1	1	1	1	1	1	1	0.857134	0.0180032	3.68038	1.56096	Q15048	Q15048	Q15048	LRC14_HUMAN	>sp|Q15048|LRC14_HUMAN Leucine-rich repeat-containing protein 14 OS=Homo sapiens OX=9606 GN=LRRC14 PE=1 SV=1
PDLIM1	PDZ and LIM domain protein 1	4.51707	2.17539	+	15.67	14.3524	14.013	14.2551	16.4842	16.4302	16.4757	16.4948	52136.3	20917.2	16532.3	19553	91672.4	88304.5	91133.9	92348.4	20235.1	91403.1	4.51707	+	PD_HC	biological regulation;regulation of biological process;regulation of biosynthetic process;regulation of cellular biosynthetic process;regulation of cellular macromolecule biosynthetic process;regulation of cellular metabolic process;regulation of cellular process;regulation of gene expression;regulation of macromolecule biosynthetic process;regulation of macromolecule metabolic process;regulation…	binding;cation binding;ion binding;metal ion binding;protein binding transcription factor activity;transcription coactivator activity;transcription cofactor activity;transcription factor binding transcription factor activity;transition metal ion binding;zinc ion binding	adherens junction;anchoring junction;cell junction;cell part;cell-substrate adherens junction;cell-substrate junction;cytoplasm;cytoskeleton;focal adhesion;intracellular non-membrane-bounded organelle;intracellular organelle;intracellular organelle part;intracellular part;macromolecular complex;non-membrane-bounded organelle;nuclear part;nucleoplasm part;organelle;organelle part;protein complex;t…				16	16	16	16	16	16	16	16	2.64943	0.00107795	1.89864	3.31376	O00151	O00151	O00151	PDLI1_HUMAN	>sp|O00151|PDLI1_HUMAN PDZ and LIM domain protein 1 OS=Homo sapiens OX=9606 GN=PDLIM1 PE=1 SV=4
ALDH1A1	Aldehyde dehydrogenase 1A1	4.45457	2.15529	+	15.766	15.1317	14.9611	15.08	17.4152	17.0383	17.2688	17.2539	55723.6	35900.1	31896.3	34636.4	174782	134598	157916	156294	35268.2	157105	4.45457	+	PD_HC	alcohol metabolic process;biological regulation;cellular aldehyde metabolic process;cellular hormone metabolic process;cellular lipid metabolic process;cellular metabolic process;cellular process;diterpenoid metabolic process;ethanol metabolic process;ethanol oxidation;fat-soluble vitamin metabolic process;hormone metabolic process;isoprenoid metabolic process;lipid metabolic process;metabolic pr…	3-chloroallyl aldehyde dehydrogenase activity;aldehyde dehydrogenase (NAD) activity;androgen binding;benzaldehyde dehydrogenase (NAD+) activity;binding;catalytic activity;enzyme activator activity;enzyme regulator activity;GTPase activator activity;GTPase regulator activity;hormone binding;lipid binding;nucleoside-triphosphatase regulator activity;oxidoreductase activity;oxidoreductase activity, …	cell part;cytoplasm;cytoplasmic part;cytosol;extracellular membrane-bounded organelle;extracellular organelle;extracellular region part;extracellular vesicular exosome;intracellular part;membrane-bounded organelle;membrane-bounded vesicle;organelle;vesicle	Retinol metabolism		REACT_268561;REACT_34	22	22	22	22	22	22	22	22	4.29065	0.000527132	2.00938	5.06588	P00352	P00352	P00352	AL1A1_HUMAN	>sp|P00352|AL1A1_HUMAN Aldehyde dehydrogenase 1A1 OS=Homo sapiens OX=9606 GN=ALDH1A1 PE=1 SV=2
DES	Desmin	4.42086	2.14433	+	12.35	13.975	12.1354	12.1708	14.3899	14.4249	14.5361	14.3533	5220.6	16102.5	4499.04	4610.8	21468	21995.2	23757.6	20930.2	4915.7	21731.6	4.42086	+	PD_HC	actin filament-based movement;actin filament-based process;actin-mediated cell contraction;actin-myosin filament sliding;biological regulation;cellular component movement;cellular component organization;cellular component organization at cellular level;cellular component organization or biogenesis;cellular component organization or biogenesis at cellular level;cellular process;cytoskeleton organi…	binding;cytoskeletal protein binding;identical protein binding;protein binding;structural constituent of cytoskeleton;structural molecule activity	adherens junction;anchoring junction;cell junction;cell part;cell-cell adherens junction;cell-cell junction;contractile fiber part;cytoplasmic part;cytoskeletal part;cytosol;extracellular membrane-bounded organelle;extracellular organelle;extracellular region part;extracellular vesicular exosome;fascia adherens;intermediate filament;intracellular organelle part;intracellular part;macromolecular c…	Arrhythmogenic right ventricular cardiomyopathy (ARVC);Dilated cardiomyopathy;Hypertrophic cardiomyopathy (HCM)		REACT_16969	20	20	20	20	20	20	20	20	2.14194	0.00168605	1.76823	2.7486	P17661	P17661	P17661	DESM_HUMAN	>sp|P17661|DESM_HUMAN Desmin OS=Homo sapiens OX=9606 GN=DES PE=1 SV=3
TSPAN6	Tetraspanin-6	4.40585	2.13942	+	14.5149	14.2412	13.9114	13.9997	16.442	16.3012	16.1176	16.2277	23411	19365.5	15408.1	16380.6	89029.8	80751.4	71101.9	76740.5	17873	78745.9	4.40585	+	PD_HC	biological regulation;cellular process;cellular response to stimulus;positive regulation of biological process;positive regulation of cell communication;positive regulation of cellular process;positive regulation of I-kappaB kinase/NF-kappaB cascade;positive regulation of intracellular protein kinase cascade;positive regulation of response to stimulus;positive regulation of signal transduction;po…	molecular transducer activity;signal transducer activity	cell part;extracellular membrane-bounded organelle;extracellular organelle;extracellular region part;extracellular vesicular exosome;integral to membrane;intrinsic to membrane;membrane part;membrane-bounded organelle;membrane-bounded vesicle;organelle;vesicle				6	6	6	6	6	6	6	6	5.063	0.000871795	2.10532	5.98951	O43657	O43657	O43657	TSN6_HUMAN	>sp|O43657|TSN6_HUMAN Tetraspanin-6 OS=Homo sapiens OX=9606 GN=TSPAN6 PE=1 SV=1
IFT46	Intraflagellar transport protein 46 homolog	4.37958	2.13079	+	10.1403	10.3245	9.7461	9.30156	11.8175	12.2513	11.9025	12.3238	1128.59	1282.28	858.753	631.028	3609.29	4875.38	3828.33	5126.65	993.669	4351.86	4.37958	+	PD_HC	anatomical structure formation involved in morphogenesis;biological regulation;cell projection assembly;cell projection organization;cell surface receptor linked signaling pathway;cellular component assembly;cellular component assembly at cellular level;cellular component assembly involved in morphogenesis;cellular component movement;cellular component organization;cellular component organization…	binding;protein binding;protein C-terminus binding	axoneme part;cell part;cell projection;cell projection part;centrosome;cilium;cytoplasm;cytoplasmic part;cytoskeletal part;intracellular non-membrane-bounded organelle;intracellular organelle;intracellular organelle part;intracellular part;intraflagellar transport particle B;macromolecular complex;microtubule organizing center;motile cilium;motile primary cilium;non-membrane-bounded organelle;org…			REACT_268024	3	3	3	3	3	3	3	3	3.82883	0.000412121	2.19565	4.78027	Q9NQC8	Q9NQC8	Q9NQC8	IFT46_HUMAN	>sp|Q9NQC8|IFT46_HUMAN Intraflagellar transport protein 46 homolog OS=Homo sapiens OX=9606 GN=IFT46 PE=1 SV=1
CFI	Complement factor I	4.33885	2.11731	+	13.529	14.1177	14.1848	14.0517	16.1707	15.908	16.2334	16.3603	11820.5	17776.7	18623	16981.8	73767.6	61487.3	77044.3	84128.1	17379.2	75405.9	4.33885	+	PD_HC	activation of immune response;biological regulation;complement activation;complement activation, classical pathway;defense response;humoral immune response;immune effector process;immune response;immune system process;innate immune response;macromolecule metabolic process;metabolic process;positive regulation of biological process;positive regulation of immune response;positive regulation of immu…	binding;cargo receptor activity;catalytic activity;cation binding;endopeptidase activity;hydrolase activity;ion binding;metal ion binding;peptidase activity;peptidase activity, acting on L-amino acid peptides;receptor activity;scavenger receptor activity;serine hydrolase activity;serine-type endopeptidase activity;serine-type peptidase activity	cell part;extracellular membrane-bounded organelle;extracellular organelle;extracellular region;extracellular region part;extracellular space;extracellular vesicular exosome;intracellular membrane-bounded organelle;intracellular organelle;intracellular part;membrane;membrane-bounded organelle;membrane-bounded vesicle;nucleus;organelle;vesicle	Complement and coagulation cascades;Staphylococcus aureus infection		REACT_118707	14	14	14	14	14	14	14	14	4.77095	0.000829268	2.19735	5.82106	P05156	P05156	P05156	CFAI_HUMAN	>sp|P05156|CFAI_HUMAN Complement factor I OS=Homo sapiens OX=9606 GN=CFI PE=1 SV=2
SYNC	Syncoilin	4.2592	2.09058	+	9.45192	10.5123	8.01225	8.99619	11.7761	11.4938	11.151	11.0281	700.344	1460.55	258.183	510.65	3507.19	2883.89	2273.97	2088.28	605.497	2578.93	4.2592	+	PD_HC	cellular process;intermediate filament-based process	structural molecule activity	cell part;contractile fiber part;cytoplasmic part;cytoskeletal part;cytosol;intermediate filament;intracellular organelle part;intracellular part;macromolecular complex;membrane;neuromuscular junction;organelle part;perinuclear region of cytoplasm;plasma membrane;protein complex;sarcolemma;synapse;Z disc				3	3	3	3	3	3	3	3	2.08892	0.00168621	2.11911	2.84127	Q9H7C4	Q9H7C4	Q9H7C4	SYNCI_HUMAN	>sp|Q9H7C4|SYNCI_HUMAN Syncoilin OS=Homo sapiens OX=9606 GN=SYNC PE=1 SV=3
MEIS1;MEIS2	Homeobox protein Meis1;Homeobox protein Meis2	4.22883	2.08026	+	11.5748	10.3173	11.0766	10.1966	12.444	13.598	12.9992	12.6305	3050.44	1275.9	2159.68	1173.5	5572.08	12399.5	8187.46	6341.02	1717.79	7264.24	4.22883	+	PD_HC	anatomical structure development;anatomical structure formation involved in morphogenesis;anatomical structure morphogenesis;angiogenesis;biological regulation;biosynthetic process;cell development;cellular biosynthetic process;cellular developmental process;cellular macromolecule biosynthetic process;cellular macromolecule metabolic process;cellular metabolic process;cellular nitrogen compound m…	binding;chromatin binding;core promoter proximal region DNA binding;core promoter proximal region sequence-specific DNA binding;DNA binding;nucleic acid binding;nucleic acid binding transcription factor activity;protein binding;protein binding transcription factor activity;regulatory region DNA binding;regulatory region nucleic acid binding;RNA polymerase II core promoter proximal region sequence…	cell part;intracellular membrane-bounded organelle;intracellular organelle;intracellular organelle part;intracellular part;macromolecular complex;membrane-bounded organelle;nuclear part;nucleoplasm part;nucleus;organelle;organelle part;protein complex;transcription factor complex				2	2	2	2	2	2	2	2	2.67263	0.000881188	2.12656	3.46738	O00470;O14770	O00470;O14770	O00470;O14770	MEIS1_HUMAN;MEIS2_HUMAN	>sp|O00470|MEIS1_HUMAN Homeobox protein Meis1 OS=Homo sapiens OX=9606 GN=MEIS1 PE=1 SV=1;>sp|O14770|MEIS2_HUMAN Homeobox protein Meis2 OS=Homo sapiens OX=9606 GN=MEIS2 PE=1 SV=2
SELENON	Selenoprotein N	4.22699	2.07963	+	12.2048	12.0537	11.0564	12.0264	14.024	14.1761	14.0611	14.351	4720.75	4251.33	2129.65	4171.64	16658.8	18511.1	17092.8	20896.9	4211.49	17801.9	4.22699	+	PD_HC		binding;calcium ion binding;cation binding;ion binding;metal ion binding	cell part;cytoplasmic part;endoplasmic reticulum membrane;endoplasmic reticulum part;intracellular organelle part;intracellular part;membrane;membrane part;organelle membrane;organelle part				3	3	3	3	3	3	3	3	3.83821	0.000459459	2.31777	4.90343	Q9NZV5	Q9NZV5	Q9NZV5	SELN_HUMAN	>sp|Q9NZV5|SELN_HUMAN Selenoprotein N OS=Homo sapiens OX=9606 GN=SELENON PE=1 SV=5
RASA3	Ras GTPase-activating protein 3	4.20188	2.07104	+	9.67157	9.70941	10.6435	10.6387	12.3715	12.2638	12.1804	12.3831	815.516	837.189	1599.61	1594.29	5298.98	4917.81	4641.58	5341.76	1215.74	5108.4	4.20188	+	PD_HC	biological regulation;calcium ion transmembrane transport;calcium ion transport;cation transport;cellular process;cellular response to stimulus;divalent inorganic cation transport;divalent metal ion transport;establishment of localization;intracellular signal transduction;ion transmembrane transport;ion transport;metal ion transport;negative regulation of biological process;negative regulation of…	binding;calcium channel activity;calcium-release channel activity;cation binding;cation channel activity;cation transmembrane transporter activity;channel activity;enzyme activator activity;enzyme regulator activity;gated channel activity;GTPase activator activity;GTPase regulator activity;ion binding;ion channel activity;ion transmembrane transporter activity;ligand-gated channel activity;ligand…	cell part;cytoplasm;intracellular part;intrinsic to internal side of plasma membrane;intrinsic to membrane;intrinsic to plasma membrane;membrane part;plasma membrane part	MAPK signaling pathway - fly			5	5	5	5	5	5	5	5	3.58625	0.000346939	2.13391	4.45782	Q14644	Q14644	Q14644	RASA3_HUMAN	>sp|Q14644|RASA3_HUMAN Ras GTPase-activating protein 3 OS=Homo sapiens OX=9606 GN=RASA3 PE=1 SV=3
MYL9	Myosin regulatory light polypeptide 9	4.19004	2.06696	+	12.4922	11.0782	10.9518	10.2556	13.3402	13.0063	13.1098	13.0564	5761.39	2162.07	1980.71	1222.48	10370.5	8227.85	8839.81	8518.6	2071.39	8679.2	4.19004	+	PD_HC	axon guidance;biological adhesion;biological regulation;cell adhesion;cell surface receptor linked signaling pathway;cell-cell adhesion;cellular process;cellular response to stimulus;chemotaxis;enzyme linked receptor protein signaling pathway;ephrin receptor signaling pathway;homotypic cell-cell adhesion;intracellular signal transduction;locomotion;multicellular organismal process;muscle contract…	binding;calcium ion binding;cation binding;ion binding;metal ion binding;structural constituent of muscle;structural molecule activity	actin filament bundle;actomyosin;cell part;contractile fiber part;cytoplasmic part;cytoskeletal part;cytosol;intracellular organelle part;intracellular part;macromolecular complex;muscle myosin complex;myosin complex;myosin II complex;organelle part;protein complex;stress fiber;Z disc	Focal adhesion;Leukocyte transendothelial migration;Regulation of actin cytoskeleton;Tight junction;Vascular smooth muscle contraction		REACT_19277;REACT_20558;REACT_264548;REACT_355192;REACT_355303;REACT_355347;REACT_355542	2	2	2	2	2	2	2	2	2.18412	0.00171337	1.93373	2.86637	P24844	P24844	P24844	MYL9_HUMAN	>sp|P24844|MYL9_HUMAN Myosin regulatory light polypeptide 9 OS=Homo sapiens OX=9606 GN=MYL9 PE=1 SV=4
CNTNAP3B;CNTNAP3	Contactin-associated protein-like 3B;Contactin-associated protein-like 3	4.18671	2.06582	+	10.8151	9.87383	9.40273	9.29681	11.7905	11.6539	11.7894	11.6292	1801.65	938.251	676.868	628.954	3542.37	3222.36	3539.67	3167.66	807.559	3381.01	4.18671	+	PD_HC	biological adhesion;cell adhesion;cell recognition;cellular process		cell part;extracellular region;integral to membrane;intrinsic to membrane;membrane;membrane part;plasma membrane				1	1	1	1	1	1	1	1	2.76099	0.00114421	1.86863	3.40461	Q96NU0;Q9BZ76	Q96NU0;Q9BZ76	Q96NU0;Q9BZ76	CNT3B_HUMAN;CNTP3_HUMAN	>sp|Q96NU0|CNT3B_HUMAN Contactin-associated protein-like 3B OS=Homo sapiens OX=9606 GN=CNTNAP3B PE=2 SV=3;>sp|Q9BZ76|CNTP3_HUMAN Contactin-associated protein-like 3 OS=Homo sapiens OX=9606 GN=CNTNAP3 PE=2 SV=3
PRKD1	Serine/threonine-protein kinase D1	4.15509	2.05488	+	7.90186	6.79086	9.30914	8.01648	9.57328	9.13994	10.6702	10.353	239.165	110.727	634.352	258.941	761.806	564.152	1629.48	1307.87	249.053	1034.84	4.15509	+	PD_HC	anatomical structure formation involved in morphogenesis;angiogenesis;apoptosis;biological regulation;biosynthetic process;cell death;cell proliferation;cell surface receptor linked signaling pathway;cellular biosynthetic process;cellular component organization;cellular component organization at cellular level;cellular component organization or biogenesis;cellular component organization or biogen…	adenyl nucleotide binding;adenyl ribonucleotide binding;ATP binding;binding;catalytic activity;cation binding;identical protein binding;ion binding;kinase activity;metal ion binding;nucleotide binding;phosphotransferase activity, alcohol group as acceptor;protein binding;protein kinase activity;protein kinase C activity;protein serine/threonine kinase activity;purine nucleotide binding;purine rib…	cell cortex;cell junction;cell part;cell-cell junction;cytoplasm;cytoplasmic part;cytosol;Golgi apparatus;Golgi apparatus part;integral to membrane;integral to plasma membrane;intracellular membrane-bounded organelle;intracellular organelle;intracellular organelle part;intracellular part;intrinsic to membrane;intrinsic to plasma membrane;membrane;membrane part;membrane-bounded organelle;nucleus;o…			REACT_115810	1	1	1	1	1	1	1	1	1.67263	0.00280913	1.92951	2.34329	Q15139	Q15139	Q15139	KPCD1_HUMAN	>sp|Q15139|KPCD1_HUMAN Serine/threonine-protein kinase D1 OS=Homo sapiens OX=9606 GN=PRKD1 PE=1 SV=2
PCP4	Calmodulin regulator protein PCP4	4.14992	2.05308	+	12.0544	11.6589	11.5653	12.0905	14.0909	13.8392	13.9068	13.9395	4253.4	3233.54	3030.42	4361.17	17449.5	14656	15359	15711.1	3743.47	15535.1	4.14992	+	PD_HC	anatomical structure development;central nervous system development;developmental process;system development		cell part;cytoplasmic part;cytosol;intracellular membrane-bounded organelle;intracellular organelle;intracellular part;membrane-bounded organelle;nucleus;organelle				3	3	3	3	3	3	3	3	5.17707	0.000918919	2.10181	6.09917	P48539	P48539	P48539	PCP4_HUMAN	>sp|P48539|PCP4_HUMAN Calmodulin regulator protein PCP4 OS=Homo sapiens OX=9606 GN=PCP4 PE=1 SV=3
PDE1A	Calcium/calmodulin-dependent 3',5'-cyclic nucleotide phosphodiesterase 1A	4.11677	2.04151	+	9.94067	11.1677	10.8614	10.6475	13.0071	12.8581	12.3425	12.7393	982.743	2300.45	1860.4	1604.05	8232.42	7424.61	5193.53	6837.72	1732.22	7131.17	4.11677	+	PD_HC	activation of phospholipase C activity;biological regulation;blood coagulation;cAMP catabolic process;cAMP metabolic process;catabolic process;cell surface receptor linked signaling pathway;cellular catabolic process;cellular metabolic process;cellular nitrogen compound catabolic process;cellular nitrogen compound metabolic process;cellular process;cellular response to chemical stimulus;cellular …	3',5'-cyclic-AMP phosphodiesterase activity;3',5'-cyclic-GMP phosphodiesterase activity;3',5'-cyclic-nucleotide phosphodiesterase activity;binding;calcium- and calmodulin-regulated 3',5'-cyclic-GMP phosphodiesterase activity;calmodulin-dependent cyclic-nucleotide phosphodiesterase activity;catalytic activity;cation binding;cGMP binding;cyclic nucleotide binding;cyclic-nucleotide phosphodiesterase…	cell body;cell part;cytoplasmic part;cytosol;intracellular membrane-bounded organelle;intracellular organelle;intracellular part;membrane-bounded organelle;neuronal cell body;nucleus;organelle	Calcium signaling pathway;Purine metabolism		REACT_15408;REACT_19327;REACT_23767	3	3	3	3	3	3	3	3	3.37649	0.000293103	2.08243	4.18941	P54750	P54750	P54750	PDE1A_HUMAN	>sp|P54750|PDE1A_HUMAN Calcium/calmodulin-dependent 3',5'-cyclic nucleotide phosphodiesterase 1A OS=Homo sapiens OX=9606 GN=PDE1A PE=1 SV=2
CDH6	Cadherin-6	4.11408	2.04057	+	12.6553	12.9528	12.9985	13.1012	15.0175	14.9821	15.0153	15.0912	6450.97	7928.32	8183.49	8787.27	33167.9	32363.9	33117.4	34906.3	8055.9	33142.6	4.11408	+	PD_HC	adherens junction organization;biological adhesion;cell adhesion;cell junction assembly;cell junction organization;cell-cell adhesion;cell-cell junction organization;cellular component assembly;cellular component assembly at cellular level;cellular component organization;cellular component organization at cellular level;cellular component organization or biogenesis;cellular component organization…	binding;calcium ion binding;cation binding;ion binding;metal ion binding	cell part;extracellular membrane-bounded organelle;extracellular organelle;extracellular region part;extracellular vesicular exosome;integral to membrane;intrinsic to membrane;membrane;membrane part;membrane-bounded organelle;membrane-bounded vesicle;organelle;plasma membrane;vesicle			REACT_19195	14	14	14	14	14	14	14	14	6.159	0.00138776	2.09957	7.0348	P55285	P55285	P55285	CADH6_HUMAN	>sp|P55285|CADH6_HUMAN Cadherin-6 OS=Homo sapiens OX=9606 GN=CDH6 PE=1 SV=1
DENND5B	DENN domain-containing protein 5B	4.09952	2.03545	+	10.227	8.80255	9.37244	0.958009	11.1226	11.2277	11.1462	11.1556	1198.49	446.51	662.805	1.94263	2229.65	2398.14	2266.42	2281.24	554.658	2273.83	4.09952	+	PD_HC	biological regulation;positive regulation of catalytic activity;positive regulation of GTPase activity;positive regulation of hydrolase activity;positive regulation of molecular function;regulation of biological process;regulation of catabolic process;regulation of catalytic activity;regulation of cellular catabolic process;regulation of cellular metabolic process;regulation of cellular process;r…	enzyme regulator activity;GTPase regulator activity;guanyl-nucleotide exchange factor activity;nucleoside-triphosphatase regulator activity;Rab guanyl-nucleotide exchange factor activity;Ras guanyl-nucleotide exchange factor activity;small GTPase regulator activity	cell part;integral to membrane;intrinsic to membrane;membrane;membrane part				4	4	4	4	4	4	4	4	0.901917	0.0157176	3.82302	1.62855	Q6ZUT9	Q6ZUT9	Q6ZUT9	DEN5B_HUMAN	>sp|Q6ZUT9|DEN5B_HUMAN DENN domain-containing protein 5B OS=Homo sapiens OX=9606 GN=DENND5B PE=1 SV=2
CPXM2	Inactive carboxypeptidase-like protein X2	4.09332	2.03327	+	10.3005	11.6808	11.2354	11.2071	13.2254	13.1651	13.6626	13.2832	1261.13	3283	2410.97	2364.14	9577.28	9185.23	12967.4	9968.77	2387.56	9773.02	4.09332	+	PD_HC		binding;carboxypeptidase activity;catalytic activity;cation binding;exopeptidase activity;hydrolase activity;ion binding;metal ion binding;metallocarboxypeptidase activity;metalloexopeptidase activity;metallopeptidase activity;peptidase activity;peptidase activity, acting on L-amino acid peptides;transition metal ion binding;zinc ion binding	extracellular region part;extracellular space				12	12	12	12	12	12	12	12	3.4316	0.000325359	2.22816	4.36441	Q8N436	Q8N436	Q8N436	CPXM2_HUMAN	>sp|Q8N436|CPXM2_HUMAN Inactive carboxypeptidase-like protein X2 OS=Homo sapiens OX=9606 GN=CPXM2 PE=2 SV=3
PLAT	Tissue-type plasminogen activator	4.0444	2.01593	+	9.79285	8.58997	10.0723	6.39858	11.3519	11.4264	10.9368	11.3062	887.037	385.335	1076.62	84.3654	2613.74	2752.26	1960.22	2532.24	636.186	2572.99	4.0444	+	PD_HC	biological regulation;blood coagulation;cell communication;cell migration;cell motility;cell surface receptor linked signaling pathway;cell-cell signaling;cellular component movement;cellular macromolecule metabolic process;cellular metabolic process;cellular process;cellular protein metabolic process;cellular response to chemical stimulus;cellular response to corticosteroid stimulus;cellular res…	catalytic activity;endopeptidase activity;hydrolase activity;peptidase activity;peptidase activity, acting on L-amino acid peptides;serine hydrolase activity;serine-type endopeptidase activity;serine-type peptidase activity	apical part of cell;cell part;cell surface;cytoplasm;cytoplasmic membrane-bounded vesicle;cytoplasmic part;cytoplasmic vesicle;extracellular membrane-bounded organelle;extracellular organelle;extracellular region;extracellular region part;extracellular space;extracellular vesicular exosome;intracellular membrane-bounded organelle;intracellular organelle;intracellular part;membrane-bounded organel…	Complement and coagulation cascades		REACT_16888;REACT_641	5	5	5	5	5	5	5	5	1.62821	0.00268462	2.54192	2.43711	P00750	P00750	P00750	TPA_HUMAN	>sp|P00750|TPA_HUMAN Tissue-type plasminogen activator OS=Homo sapiens OX=9606 GN=PLAT PE=1 SV=1
C1orf226	Uncharacterized protein C1orf226	4.0282	2.01013	+	11.0368	10.7087	9.07974	11.5701	12.6238	12.8067	13.3174	12.9729	2100.91	1673.55	541.096	3040.52	6311.64	7164.75	10207.9	8039.56	1887.23	7602.15	4.0282	+	PD_HC							1	1	1	1	1	1	1	1	2.24025	0.00107519	2.33137	3.08198	A1L170	A1L170	A1L170	CA226_HUMAN	>sp|A1L170|CA226_HUMAN Uncharacterized protein C1orf226 OS=Homo sapiens OX=9606 GN=C1orf226 PE=1 SV=1
S100B	Protein S100-B	3.98837	1.9958	+	14.2552	15.8782	15.3009	15.4639	16.9785	17.4233	17.3794	17.3816	19554.3	60230.2	40367.3	45195.8	129133	175766	170499	170759	42781.5	170629	3.98837	+	PD_HC	anatomical structure development;anatomical structure morphogenesis;astrocyte differentiation;axonogenesis;behavior;biological regulation;cell differentiation;cell part morphogenesis;cell projection morphogenesis;cell projection organization;cell proliferation;cellular component morphogenesis;cellular component organization;cellular component organization at cellular level;cellular component orga…	binding;calcium ion binding;calcium-dependent protein binding;cation binding;cytoskeletal protein binding;identical protein binding;ion binding;metal ion binding;protein binding;protein dimerization activity;protein homodimerization activity;RAGE receptor binding;receptor binding;tau protein binding;transition metal ion binding;zinc ion binding	cell body;cell part;cell projection;cytoplasm;cytoplasmic part;extracellular region;extracellular region part;extracellular space;intracellular membrane-bounded organelle;intracellular organelle;intracellular part;membrane-bounded organelle;neuronal cell body;nucleus;organelle;perinuclear region of cytoplasm;ruffle			REACT_116022;REACT_118563;REACT_163773;REACT_21281;REACT_24969;REACT_25195	3	3	3	3	3	3	3	3	2.9106	0.000672566	2.06614	3.68489	P04271	P04271	P04271	S100B_HUMAN	>sp|P04271|S100B_HUMAN Protein S100-B OS=Homo sapiens OX=9606 GN=S100B PE=1 SV=2
SNTB1	Beta-1-syntrophin	3.97493	1.99093	+	12.1452	11.2394	11.2759	11.0133	13.6492	12.9436	13.3394	13.1519	4529.7	2417.67	2479.61	2066.97	12847.5	7877.93	10364.8	9101.57	2448.64	9733.17	3.97493	+	PD_HC	multicellular organismal process;muscle contraction;muscle system process;system process		adherens junction;anchoring junction;cell junction;cell part;cell-substrate adherens junction;cell-substrate junction;cytoplasm;cytoskeleton;dystrophin-associated glycoprotein complex;focal adhesion;intracellular non-membrane-bounded organelle;intracellular organelle;intracellular part;macromolecular complex;membrane;membrane part;non-membrane-bounded organelle;organelle;plasma membrane;plasma me…				6	6	6	6	6	6	6	6	3.15444	0.0007125	1.85258	3.77575	Q13884	Q13884	Q13884	SNTB1_HUMAN	>sp|Q13884|SNTB1_HUMAN Beta-1-syntrophin OS=Homo sapiens OX=9606 GN=SNTB1 PE=1 SV=3
PDE1C	Calcium/calmodulin-dependent 3',5'-cyclic nucleotide phosphodiesterase 1C	3.96494	1.9873	+	9.1639	9.8391	6.53994	6.38057	10.6085	10.4361	10.2967	10.1887	573.6	915.934	93.0504	83.3188	1561.27	1385.41	1257.81	1167.09	333.325	1321.61	3.96494	+	PD_HC	activation of phospholipase C activity;biological regulation;cell surface receptor linked signaling pathway;cellular process;cellular response to chemical stimulus;cellular response to fibroblast growth factor stimulus;cellular response to growth factor stimulus;cellular response to organic substance;cellular response to stimulus;defense response;enzyme linked receptor protein signaling pathway;e…	3',5'-cyclic-nucleotide phosphodiesterase activity;binding;calmodulin-dependent cyclic-nucleotide phosphodiesterase activity;catalytic activity;cation binding;cyclic-nucleotide phosphodiesterase activity;hydrolase activity;hydrolase activity, acting on ester bonds;ion binding;metal ion binding;phosphoric diester hydrolase activity;phosphoric ester hydrolase activity	cell part;cytoplasmic part;cytosol;intracellular part	Calcium signaling pathway;Purine metabolism		REACT_15408	4	4	4	4	4	4	4	4	1.44115	0.00411819	2.40163	2.19547	Q14123	Q14123	Q14123	PDE1C_HUMAN	>sp|Q14123|PDE1C_HUMAN Calcium/calmodulin-dependent 3',5'-cyclic nucleotide phosphodiesterase 1C OS=Homo sapiens OX=9606 GN=PDE1C PE=1 SV=1
ARHGAP12	Rho GTPase-activating protein 12	3.949	1.98149	+	12.5982	12.0222	12.3145	11.947	14.086	14.4154	14.2251	14.0118	6200.63	4159.52	5093.71	3948.26	17390.4	21850.8	19150.6	16518.6	4626.61	18270.5	3.949	+	PD_HC	anatomical structure morphogenesis;biological regulation;cellular process;cellular response to stimulus;developmental process;intracellular signal transduction;morphogenesis of an epithelial sheet;morphogenesis of an epithelium;regulation of biological process;regulation of cellular process;regulation of response to stimulus;regulation of signal transduction;regulation of signaling;regulation of …	enzyme activator activity;enzyme regulator activity;GTPase activator activity;GTPase regulator activity;nucleoside-triphosphatase regulator activity	cell part;cytoplasmic part;cytosol;intracellular part			REACT_11051	9	9	9	9	9	9	9	9	4.55011	0.000607143	1.96408	5.26255	Q8IWW6	Q8IWW6	Q8IWW6	RHG12_HUMAN	>sp|Q8IWW6|RHG12_HUMAN Rho GTPase-activating protein 12 OS=Homo sapiens OX=9606 GN=ARHGAP12 PE=1 SV=1
MTM1	Myotubularin	3.87998	1.95605	+	9.85416	8.98059	9.90322	10.2443	11.7831	11.7552	12.0984	11.885	925.545	505.158	957.561	1212.95	3524.25	3456.75	4385.12	3782.17	941.553	3653.21	3.87998	+	PD_HC	anatomical structure homeostasis;anatomical structure morphogenesis;biological regulation;biosynthetic process;cell part morphogenesis;cellular biosynthetic process;cellular component morphogenesis;cellular component organization;cellular component organization at cellular level;cellular component organization or biogenesis;cellular component organization or biogenesis at cellular level;cellular …	binding;catalytic activity;hydrolase activity;hydrolase activity, acting on ester bonds;inositol or phosphatidylinositol phosphatase activity;intermediate filament binding;lipid binding;lipid phosphatase activity;phosphatase activity;phosphatidylinositol binding;phosphatidylinositol bisphosphate phosphatase activity;phosphatidylinositol monophosphate phosphatase activity;phosphatidylinositol-3,5-…	cell part;cell projection;contractile fiber part;cytoplasm;cytoplasmic part;cytosol;endosome;extracellular membrane-bounded organelle;extracellular organelle;extracellular region part;extracellular vesicular exosome;filopodium;I band;intracellular membrane-bounded organelle;intracellular organelle;intracellular part;late endosome;membrane;membrane-bounded organelle;membrane-bounded vesicle;organe…			REACT_120756;REACT_120918;REACT_121025	6	6	6	6	6	6	6	6	3.57299	0.000343434	2.13485	4.44426	Q13496	Q13496	Q13496	MTM1_HUMAN	>sp|Q13496|MTM1_HUMAN Myotubularin OS=Homo sapiens OX=9606 GN=MTM1 PE=1 SV=2
CA14	Carbonic anhydrase 14	3.8662	1.95092	+	11.24	10.255	7.6203	8.51385	11.6172	11.5774	11.5895	11.3539	2418.67	1221.98	196.761	365.531	3141.42	3055.94	3081.68	2617.37	793.753	3068.81	3.8662	+	PD_HC	anion transport;bicarbonate transport;establishment of localization;inorganic anion transport;ion transport;metabolic process;organic anion transport;small molecule metabolic process;transport	binding;carbonate dehydratase activity;carbon-oxygen lyase activity;catalytic activity;cation binding;hydro-lyase activity;ion binding;lyase activity;metal ion binding	cell part;integral to membrane;intrinsic to membrane;membrane;membrane part;plasma membrane	Nitrogen metabolism		REACT_121123	2	2	2	2	2	2	2	2	1.38323	0.00560267	2.12718	2.08086	Q9ULX7	Q9ULX7	Q9ULX7	CAH14_HUMAN	>sp|Q9ULX7|CAH14_HUMAN Carbonic anhydrase 14 OS=Homo sapiens OX=9606 GN=CA14 PE=1 SV=1
BMP1	Bone morphogenetic protein 1	3.75534	1.90895	+	10.2484	6.4931	9.66722	9.12781	11.9802	11.958	10.1993	10.1724	1216.4	90.0778	813.061	559.429	4040.17	3978.48	1175.7	1153.98	686.245	2577.09	3.75534	+	PD_HC	anatomical structure development;biological adhesion;biological regulation;cartilage condensation;cell adhesion;cell differentiation;cell-cell adhesion;cellular component disassembly;cellular component disassembly at cellular level;cellular component organization;cellular component organization at cellular level;cellular component organization or biogenesis;cellular component organization or biog…	binding;calcium ion binding;catalytic activity;cation binding;endopeptidase activity;hydrolase activity;ion binding;metal ion binding;metalloendopeptidase activity;metallopeptidase activity;peptidase activity;peptidase activity, acting on L-amino acid peptides;transition metal ion binding;zinc ion binding	cell part;cytoplasmic part;extracellular matrix;extracellular region;extracellular region part;extracellular space;Golgi apparatus;intracellular membrane-bounded organelle;intracellular organelle;intracellular part;membrane-bounded organelle;membrane-bounded vesicle;organelle;proteinaceous extracellular matrix;vesicle			REACT_118572;REACT_121139;REACT_13621;REACT_150206;REACT_150268	3	3	3	3	3	3	3	3	1.18248	0.00893108	2.19334	1.86504	P13497	P13497	P13497	BMP1_HUMAN	>sp|P13497|BMP1_HUMAN Bone morphogenetic protein 1 OS=Homo sapiens OX=9606 GN=BMP1 PE=1 SV=2
CRABP1	Cellular retinoic acid-binding protein 1	3.7319	1.89991	+	16.3458	16.7898	16.3246	16.369	18.1429	18.4294	18.3634	18.1205	83286.8	113301	82071.9	84636.9	289439	353022	337236	284980	83961.9	313338	3.7319	+	PD_HC	biological regulation;cellular process;cellular response to stimulus;developmental process;multicellular organismal development;multicellular organismal process;regulation of biological process;regulation of cellular process;response to stimulus;signal transduction	binding;carboxylic acid binding;isoprenoid binding;lipid binding;monocarboxylic acid binding;retinal binding;retinoic acid binding;retinoid binding;retinol binding;transporter activity;vitamin binding	cell part;cytoplasmic part;cytosol;intracellular part			REACT_268561	11	11	11	11	11	11	11	11	4.95526	0.000647619	1.80673	5.38259	P29762	P29762	P29762	RABP1_HUMAN	>sp|P29762|RABP1_HUMAN Cellular retinoic acid-binding protein 1 OS=Homo sapiens OX=9606 GN=CRABP1 PE=1 SV=2
NCAPD2	Condensin complex subunit 1	3.68369	1.88115	+	9.51805	7.63261	9.10911	7.33886	10.3297	10.5341	10.4563	10.4097	733.193	198.447	552.224	161.889	1286.91	1482.79	1404.95	1360.29	375.336	1382.62	3.68369	+	PD_HC	cell cycle;cell cycle process;cell division;cellular component organization;cellular component organization at cellular level;cellular component organization or biogenesis;cellular component organization or biogenesis at cellular level;cellular macromolecule metabolic process;cellular metabolic process;cellular nitrogen compound metabolic process;cellular process;chromosome condensation;chromosom…	binding;histone binding;protein binding	cell part;chromosomal part;chromosome;condensed chromosome;condensin complex;condensin core heterodimer;cytoplasm;cytoplasmic part;cytosol;intracellular membrane-bounded organelle;intracellular non-membrane-bounded organelle;intracellular organelle;intracellular organelle part;intracellular part;macromolecular complex;membrane;membrane-bounded organelle;non-membrane-bounded organelle;nuclear part…	Cell cycle - yeast	13S condensin complex;Condensin I complex;Condensin I-PARP-1-XRCC1 complex	REACT_150260	1	1	1	1	1	1	1	1	2.0318	0.00169343	2.0328	2.74973	Q15021	Q15021	Q15021	CND1_HUMAN	>sp|Q15021|CND1_HUMAN Condensin complex subunit 1 OS=Homo sapiens OX=9606 GN=NCAPD2 PE=1 SV=3
USP6NL	USP6 N-terminal-like protein	3.66105	1.87226	+	7.69001	4.82051	6.72561	0.134151	7.17845	8.88006	7.91076	7.96725	206.502	28.2565	105.83	1.09745	144.853	471.156	240.645	250.254	67.0434	245.449	3.66105	+	PD_HC	biological regulation;cellular component assembly;cellular component assembly at cellular level;cellular component organization;cellular component organization at cellular level;cellular component organization or biogenesis;cellular component organization or biogenesis at cellular level;cellular process;cellular process involved in reproduction;establishment of localization;establishment of local…	binding;enzyme activator activity;enzyme binding;enzyme regulator activity;GTPase activator activity;GTPase binding;GTPase regulator activity;nucleoside-triphosphatase regulator activity;protein binding;Rab GTPase binding;Ras GTPase binding;small GTPase binding	cell part;cytoplasmic membrane-bounded vesicle;cytoplasmic part;cytoplasmic vesicle;Golgi apparatus;intracellular membrane-bounded organelle;intracellular organelle;intracellular part;membrane;membrane-bounded organelle;membrane-bounded vesicle;organelle;plasma membrane;vesicle				2	2	2	2	2	2	2	2	0.933164	0.0154415	3.14156	1.64079	Q92738	Q92738	Q92738	US6NL_HUMAN	>sp|Q92738|US6NL_HUMAN USP6 N-terminal-like protein OS=Homo sapiens OX=9606 GN=USP6NL PE=1 SV=3
CASP7	Caspase-7	3.6225	1.85698	+	10.6824	10.9662	10.157	9.6597	12.2374	12.0954	12.4254	12.3609	1643.32	2000.58	1141.73	808.834	4828.64	4376.01	5500.7	5260.19	1392.52	5044.41	3.6225	+	PD_HC	activation of caspase activity;activation of caspase activity by cytochrome c;apoptosis;biological regulation;cell death;cellular component disassembly;cellular component disassembly at cellular level;cellular component disassembly involved in apoptosis;cellular component organization;cellular component organization at cellular level;cellular component organization or biogenesis;cellular componen…	catalytic activity;cysteine-type endopeptidase activity;cysteine-type peptidase activity;endopeptidase activity;hydrolase activity;peptidase activity;peptidase activity, acting on L-amino acid peptides	cell part;cytoplasm;cytoplasmic part;cytosol;intracellular membrane-bounded organelle;intracellular organelle;intracellular organelle part;intracellular part;membrane-bounded organelle;nuclear part;nucleoplasm;nucleus;organelle;organelle part	Alzheimer's disease;Apoptosis		REACT_107;REACT_13541;REACT_1767;REACT_2190;REACT_607	5	5	5	5	5	5	5	5	3.1706	0.000745098	1.91347	3.84144	P55210	P55210	P55210	CASP7_HUMAN	>sp|P55210|CASP7_HUMAN Caspase-7 OS=Homo sapiens OX=9606 GN=CASP7 PE=1 SV=1
WLS	Protein wntless homolog	3.61543	1.85417	+	13.9967	14.3063	14.325	14.3594	16.2832	16.0336	16.1074	16.2297	16346.6	20259.3	20523.7	21018.9	79750.2	67080.2	70601	76846.9	20391.5	73723.9	3.61543	+	PD_HC	anatomical structure formation involved in morphogenesis;anterior/posterior axis specification;axis specification;biological regulation;cell surface receptor linked signaling pathway;cellular process;cellular response to stimulus;developmental process;formation of primary germ layer;mesoderm formation;pattern specification process;positive regulation of biological process;positive regulation of c…	molecular transducer activity;signal transducer activity	cell part;cell projection cytoplasm;cell projection membrane;cell projection part;cytoplasmic part;cytoplasmic vesicle membrane;cytoplasmic vesicle part;dendrite cytoplasm;dendrite membrane;early endosome membrane;endosomal part;endosome membrane;Golgi apparatus part;Golgi membrane;integral to membrane;intracellular organelle part;intracellular part;intrinsic to membrane;leading edge membrane;mem…			REACT_163710	8	8	8	8	8	8	8	8	5.84626	0.0010303	1.91664	6.35709	Q5T9L3	Q5T9L3	Q5T9L3	WLS_HUMAN	>sp|Q5T9L3|WLS_HUMAN Protein wntless homolog OS=Homo sapiens OX=9606 GN=WLS PE=1 SV=2
CNEP1R1	Nuclear envelope phosphatase-regulatory subunit 1	3.61237	1.85294	+	6.78505	8.50168	9.73463	7.20122	10.0982	9.57263	10.0761	7.63001	110.282	362.461	851.953	147.158	1096.13	761.463	1079.46	198.09	254.809	920.464	3.61237	+	PD_HC	biological regulation;cell cycle;cell cycle process;cellular component disassembly;cellular component disassembly at cellular level;cellular component organization;cellular component organization at cellular level;cellular component organization or biogenesis;cellular component organization or biogenesis at cellular level;cellular localization;cellular macromolecule localization;cellular membrane…		cell part;cytoplasm;envelope;integral to membrane;intracellular organelle part;intracellular part;intrinsic to membrane;macromolecular complex;membrane;membrane part;Nem1-Spo7 phosphatase complex;nuclear envelope;nuclear membrane;nuclear part;organelle envelope;organelle membrane;organelle part;protein complex;protein serine/threonine phosphatase complex			REACT_263908	1	1	1	1	1	1	1	1	0.7059	0.0443823	1.2886	1.18464	Q8N9A8	Q8N9A8	Q8N9A8	NEPR1_HUMAN	>sp|Q8N9A8|NEPR1_HUMAN Nuclear envelope phosphatase-regulatory subunit 1 OS=Homo sapiens OX=9606 GN=CNEP1R1 PE=1 SV=1
MAP7	Ensconsin	3.60267	1.84907	+	10.9049	8.30281	8.99707	8.23463	10.4623	10.5216	10.7485	10.5589	1917.35	315.787	510.961	301.211	1410.8	1470	1720.37	1508.5	413.374	1489.25	3.60267	+	PD_HC	cellular component organization;cellular component organization at cellular level;cellular component organization or biogenesis;cellular component organization or biogenesis at cellular level;cellular localization;cellular macromolecule localization;cellular membrane organization;cellular process;cellular protein localization;cytoskeleton organization;establishment or maintenance of cell polarity…	binding;protein binding;receptor binding;structural molecule activity	basolateral plasma membrane;cell part;cytoplasm;cytoplasmic part;cytoskeletal part;cytoskeleton;intracellular non-membrane-bounded organelle;intracellular organelle;intracellular organelle part;intracellular part;macromolecular complex;membrane part;microtubule;microtubule associated complex;microtubule cytoskeleton;non-membrane-bounded organelle;organelle;organelle part;perinuclear region of cyt…				1	1	1	1	1	1	1	1	1.23659	0.0112414	1.46296	1.77175	Q14244	Q14244	Q14244	MAP7_HUMAN	>sp|Q14244|MAP7_HUMAN Ensconsin OS=Homo sapiens OX=9606 GN=MAP7 PE=1 SV=1
GATM	Glycine amidinotransferase, mitochondrial	3.60123	1.84849	+	14.0187	12.1256	11.9235	11.9823	13.8631	13.9442	14.0062	13.4062	16597.7	4468.58	3884.46	4046.05	14900.8	15762.4	16454.6	10856	4257.32	15331.6	3.60123	+	PD_HC	amine biosynthetic process;amine metabolic process;anatomical structure development;anatomical structure morphogenesis;biosynthetic process;carboxylic acid biosynthetic process;carboxylic acid metabolic process;cellular amine metabolic process;cellular amino acid biosynthetic process;cellular amino acid metabolic process;cellular biosynthetic process;cellular ketone metabolic process;cellular met…	amidinotransferase activity;catalytic activity;glycine amidinotransferase activity;hydrolase activity;hydrolase activity, acting on carbon-nitrogen (but not peptide) bonds;hydrolase activity, acting on carbon-nitrogen (but not peptide) bonds, in linear amidines;transferase activity;transferase activity, transferring nitrogenous groups;transferase activity, transferring one-carbon groups	cell part;cytoplasmic part;extracellular membrane-bounded organelle;extracellular organelle;extracellular region part;extracellular vesicular exosome;intracellular organelle part;intracellular part;membrane;membrane-bounded organelle;membrane-bounded vesicle;membrane-enclosed lumen;mitochondrial inner membrane;mitochondrial intermembrane space;mitochondrial membrane;mitochondrial part;organelle;o…	Arginine and proline metabolism;Glycine, serine and threonine metabolism		REACT_813	12	12	12	12	12	12	12	12	1.31832	0.0106702	1.29239	1.79023	P50440	P50440	P50440	GATM_HUMAN	>sp|P50440|GATM_HUMAN Glycine amidinotransferase, mitochondrial OS=Homo sapiens OX=9606 GN=GATM PE=1 SV=1
ABHD4	(Lyso)-N-acylphosphatidylethanolamine lipase	3.59598	1.84639	+	9.85973	9.96698	11.0316	10.8439	12.2876	12.4249	12.3467	12.0952	929.126	1000.83	2093.35	1837.97	4999.61	5498.8	5208.67	4375.4	1419.4	5104.14	3.59598	+	PD_HC	catabolic process;lipid catabolic process;lipid metabolic process;metabolic process;primary metabolic process	catalytic activity;hydrolase activity					3	3	3	3	3	3	3	3	3.04047	0.000662791	1.86305	3.67354	Q8TB40	Q8TB40	Q8TB40	ABHD4_HUMAN	>sp|Q8TB40|ABHD4_HUMAN (Lyso)-N-acylphosphatidylethanolamine lipase OS=Homo sapiens OX=9606 GN=ABHD4 PE=1 SV=1
FBLN5	Fibulin-5	3.5191	1.81521	+	14.6864	14.8686	15.3014	14.8964	16.6752	16.5782	16.7251	16.72	26366.2	29915.4	40381.3	30497.4	104649	97844.3	108332	107950	30206.4	106299	3.5191	+	PD_HC	biological adhesion;biological regulation;cell adhesion;cell-matrix adhesion;cell-substrate adhesion;cellular component assembly;cellular component assembly at cellular level;cellular component organization;cellular component organization at cellular level;cellular component organization or biogenesis;cellular component organization or biogenesis at cellular level;cellular localization;cellular m…	binding;calcium ion binding;cation binding;identical protein binding;integrin binding;ion binding;metal ion binding;protein binding;protein complex binding;protein C-terminus binding;protein dimerization activity;protein homodimerization activity;receptor binding	elastic fiber;extracellular matrix;extracellular matrix part;extracellular membrane-bounded organelle;extracellular organelle;extracellular region;extracellular region part;extracellular space;extracellular vesicular exosome;membrane-bounded organelle;membrane-bounded vesicle;organelle;proteinaceous extracellular matrix;vesicle			REACT_150331;REACT_150366	10	10	10	10	10	10	10	10	4.88404	0.000591304	1.73643	5.19723	Q9UBX5	Q9UBX5	Q9UBX5	FBLN5_HUMAN	>sp|Q9UBX5|FBLN5_HUMAN Fibulin-5 OS=Homo sapiens OX=9606 GN=FBLN5 PE=1 SV=1
TNC	Tenascin	3.44256	1.78348	+	15.6027	15.0716	16.0815	15.2862	17.2002	17.2719	17.2004	17.6554	49760	34435.3	69344.8	39958.1	150583	158256	150604	206445	44859.1	154430	3.44256	+	PD_HC	anatomical structure morphogenesis;axis elongation;axon regeneration;axonogenesis;biological adhesion;biological regulation;branch elongation of an epithelium;bud outgrowth involved in lung branching;cell adhesion;cell communication;cell differentiation;cell part morphogenesis;cell projection morphogenesis;cell projection organization;cell-cell signaling;cellular component morphogenesis;cellular …	binding;protein binding;syndecan binding	adherens junction;anchoring junction;basement membrane;cell junction;cell part;cell-substrate adherens junction;cell-substrate junction;extracellular matrix;extracellular matrix part;extracellular region;extracellular region part;extracellular space;focal adhesion;interstitial matrix;membrane;proteinaceous extracellular matrix	ECM-receptor interaction;Focal adhesion	ITGA9-ITGB1-TNC complex	REACT_13552;REACT_163906;REACT_163942	80	80	80	80	80	80	80	80	3.51582	0.000507937	1.82146	4.09313	P24821	P24821	P24821	TENA_HUMAN	>sp|P24821|TENA_HUMAN Tenascin OS=Homo sapiens OX=9606 GN=TNC PE=1 SV=3
SPA17	Sperm surface protein Sp17	3.43804	1.78159	+	8.30198	8.87009	9.33742	9.80604	10.8068	10.9947	11.0783	10.8076	315.606	467.911	646.909	895.184	1791.31	2040.49	2162.22	1792.3	557.41	1916.4	3.43804	+	PD_HC	binding of sperm to zona pellucida;cell recognition;cell-cell recognition;cellular component movement;cellular process;cellular process involved in reproduction;cilium movement;epithelial cilium movement;fertilization;gamete generation;male gamete generation;microtubule-based movement;microtubule-based process;multicellular organismal process;multicellular organismal reproductive process;reproduc…	binding;calmodulin binding;protein binding	cell part;cell projection;cell projection part;cilium;cytoplasm;flagellar fibrous sheath;flagellum part;intracellular organelle part;intracellular part;membrane;microtubule-based flagellum part;motile cilium;organelle part;primary cilium				2	2	2	2	2	2	2	2	2.86061	0.000905852	1.84297	3.48395	Q15506	Q15506	Q15506	SP17_HUMAN	>sp|Q15506|SP17_HUMAN Sperm surface protein Sp17 OS=Homo sapiens OX=9606 GN=SPA17 PE=1 SV=1
MED17	Mediator of RNA polymerase II transcription subunit 17	3.43482	1.78023	+	7.67658	1.04834	6.9258	0.671677	8.05833	7.30522	8.46136	7.18691	204.588	2.06815	121.583	1.59292	266.562	158.158	352.471	145.705	61.8257	212.36	3.43482	+	PD_HC	androgen receptor signaling pathway;biological regulation;biosynthetic process;cellular biosynthetic process;cellular macromolecule metabolic process;cellular metabolic process;cellular nitrogen compound metabolic process;cellular process;cellular response to stimulus;developmental process;gene expression;intracellular receptor mediated signaling pathway;macromolecule metabolic process;metabolic …	binding;hormone receptor binding;ligand-dependent nuclear receptor transcription coactivator activity;nuclear hormone receptor binding;protein binding;protein binding transcription factor activity;receptor activity;receptor binding;RNA polymerase II transcription cofactor activity;RNA polymerase II transcription factor binding transcription factor activity;thyroid hormone receptor binding;transcr…	cell part;intracellular membrane-bounded organelle;intracellular organelle;intracellular organelle part;intracellular part;macromolecular complex;mediator complex;membrane;membrane-bounded organelle;nuclear part;nucleoplasm;nucleoplasm part;nucleus;organelle;organelle part;protein complex;transcription factor complex		ARC complex;ARC92-Mediator complex;ARC-L complex;BRD4 complex;CRSP complex;CRSP-Mediator 2 complex;DRIP complex;Mediator complex;PC2 complex;SMCC complex;TFTC-type histone acetyl transferase complex;TRAP complex;TRAP-SMCC mediator complex	REACT_116145;REACT_12627;REACT_27161	1	1	1	1	1	1	1	1	0.998659	0.0115629	3.67235	1.7554	Q9NVC6	Q9NVC6	Q9NVC6	MED17_HUMAN	>sp|Q9NVC6|MED17_HUMAN Mediator of RNA polymerase II transcription subunit 17 OS=Homo sapiens OX=9606 GN=MED17 PE=1 SV=2
HSD11B1L	Hydroxysteroid 11-beta-dehydrogenase 1-like protein	3.4176	1.77298	+	9.64348	0.973241	9.31781	7.76551	10.5357	10.4921	10.6944	8.89468	799.791	1.96325	638.176	217.596	1484.44	1440.25	1657.05	475.955	427.886	1462.34	3.4176	+	PD_HC		catalytic activity;oxidoreductase activity	extracellular region				1	1	1	1	1	1	1	1	0.770441	0.0256392	3.22921	1.42301	Q7Z5J1	Q7Z5J1	Q7Z5J1	DHI1L_HUMAN	>sp|Q7Z5J1|DHI1L_HUMAN Hydroxysteroid 11-beta-dehydrogenase 1-like protein OS=Homo sapiens OX=9606 GN=HSD11B1L PE=2 SV=1
PHLDA1	Pleckstrin homology-like domain family A member 1	3.39673	1.76415	+	11.7209	8.77164	8.46447	10.086	11.4262	11.2435	11.4442	11.1874	3375.53	437.046	353.231	1086.9	2751.88	2424.55	2786.43	2332.08	761.971	2588.21	3.39673	+	PD_HC	apoptosis;biological regulation;biosynthetic process;cell death;cell differentiation;cellular biosynthetic process;cellular developmental process;cellular macromolecule biosynthetic process;cellular macromolecule metabolic process;cellular metabolic process;cellular process;central nervous system neuron differentiation;death;developmental process;FasL biosynthetic process;forebrain neuron differe…		cell part;cytoplasmic part;cytoplasmic vesicle membrane;cytoplasmic vesicle part;intracellular non-membrane-bounded organelle;intracellular organelle;intracellular organelle part;intracellular part;membrane;non-membrane-bounded organelle;nuclear part;nucleolus;nucleoplasm;organelle;organelle membrane;organelle part;plasma membrane;vesicle membrane				4	4	4	4	4	4	4	4	1.09471	0.014738	1.56457	1.65597	Q8WV24	Q8WV24	Q8WV24	PHLA1_HUMAN	>sp|Q8WV24|PHLA1_HUMAN Pleckstrin homology-like domain family A member 1 OS=Homo sapiens OX=9606 GN=PHLDA1 PE=1 SV=4
SORBS1	Sorbin and SH3 domain-containing protein 1	3.33122	1.73605	+	13.4716	13.4181	13.1982	13.1557	14.9645	15.1155	15.1178	14.978	11359.4	10945.9	9398.4	9125.58	31971.5	35499.2	35555.9	32272.1	10172.1	33885.7	3.33122	+	PD_HC	actin cytoskeleton organization;actin filament bundle assembly;actin filament organization;actin filament-based process;biological adhesion;biological regulation;carbohydrate transport;cell adhesion;cell junction assembly;cell junction organization;cell surface receptor linked signaling pathway;cell-matrix adhesion;cell-substrate adhesion;cell-substrate junction assembly;cellular component assemb…	actin binding;binding;binding, bridging;cytoskeletal protein binding;insulin receptor binding;protein binding;protein binding, bridging;protein complex binding;receptor binding;SH3/SH2 adaptor activity;signaling adaptor activity	actin filament bundle;actomyosin;adherens junction;anchoring junction;cell junction;cell part;cell-cell adherens junction;cell-cell junction;cell-substrate adherens junction;cell-substrate junction;centrosome;cytoplasm;cytoplasmic part;cytoskeletal part;cytosol;focal adhesion;intracellular membrane-bounded organelle;intracellular non-membrane-bounded organelle;intracellular organelle;intracellula…	Adherens junction;Insulin signaling pathway;PPAR signaling pathway		REACT_20558	19	19	19	19	19	19	19	19	5.92085	0.000883117	1.73305	5.99363	Q9BX66	Q9BX66	Q9BX66	SRBS1_HUMAN	>sp|Q9BX66|SRBS1_HUMAN Sorbin and SH3 domain-containing protein 1 OS=Homo sapiens OX=9606 GN=SORBS1 PE=1 SV=3
PLTP	Phospholipid transfer protein	3.32785	1.73459	+	14.0804	13.1884	13.1605	13.9973	15.4583	15.3658	15.4008	15.0022	17323	9334.78	9155.99	16353.4	45020.7	42224.7	43261.6	32818	12844.1	42743.2	3.32785	+	PD_HC	biological regulation;biosynthetic process;cell motility;cellular biosynthetic process;cellular component movement;cellular component organization;cellular component organization or biogenesis;cellular metabolic process;cellular process;establishment of localization;fat-soluble vitamin biosynthetic process;fat-soluble vitamin metabolic process;heterocycle metabolic process;high-density lipoprotei…	binding;lipid binding	extracellular region;extracellular region part;extracellular space	PPAR signaling pathway		REACT_13621	7	7	7	7	7	7	7	7	3.12078	0.0008	1.70016	3.61231	P55058	P55058	P55058	PLTP_HUMAN	>sp|P55058|PLTP_HUMAN Phospholipid transfer protein OS=Homo sapiens OX=9606 GN=PLTP PE=1 SV=1
CLNS1A	Methylosome subunit pICln	3.32311	1.73254	+	13.462	12.6076	11.7031	11.5766	14.0456	13.9808	13.9341	13.8463	11284.1	6241.17	3334.14	3054.24	16910.1	16167.4	15652.4	14728.3	4787.65	15909.9	3.32311	+	PD_HC	anion transport;biological regulation;cell volume homeostasis;cellular component assembly;cellular component assembly at cellular level;cellular component organization;cellular component organization at cellular level;cellular component organization or biogenesis;cellular component organization or biogenesis at cellular level;cellular homeostasis;cellular macromolecular complex assembly;cellular …	binding;protein binding;protein dimerization activity;protein heterodimerization activity	cell part;cytoplasm;cytoplasmic part;cytoskeleton;cytosol;intracellular membrane-bounded organelle;intracellular non-membrane-bounded organelle;intracellular organelle;intracellular organelle part;intracellular part;macromolecular complex;membrane;membrane-bounded organelle;methylosome;methyltransferase complex;non-membrane-bounded organelle;nuclear part;nucleoplasm;nucleus;organelle;organelle pa…	RNA transport	20S methylosome and RG-containing Sm protein complex;20S methylosome-SmD complex;20S methyltransferase complex;20S methyltransferase core complex;6S methyltransferase and RG-containing Sm proteins complex;6S methyltransferase complex;Anti-Sm protein complex;AR coactivator complex;JBP1-pICln complex	REACT_11066	2	2	2	2	2	2	2	2	1.97342	0.00249697	1.61436	2.51624	P54105	P54105	P54105	ICLN_HUMAN	>sp|P54105|ICLN_HUMAN Methylosome subunit pICln OS=Homo sapiens OX=9606 GN=CLNS1A PE=1 SV=1
EEF1A1	Elongation factor 1-alpha 1	3.31424	1.72868	+	11.8932	12.9215	12.4878	12.6703	13.4374	14.5596	14.5989	14.0095	3803.73	7758.17	5743.84	6518.39	11093.3	24147.7	24814.6	16492.2	6131.12	20320	3.31424	+	PD_HC	biological regulation;biosynthetic process;cellular biosynthetic process;cellular macromolecule biosynthetic process;cellular macromolecule metabolic process;cellular metabolic process;cellular nitrogen compound metabolic process;cellular process;cellular protein metabolic process;cellular response to chemical stimulus;cellular response to endogenous stimulus;cellular response to epidermal growth…	binding;catalytic activity;enzyme binding;GTP binding;GTPase activity;guanyl nucleotide binding;guanyl ribonucleotide binding;hydrolase activity;hydrolase activity, acting on acid anhydrides;hydrolase activity, acting on acid anhydrides, in phosphorus-containing anhydrides;kinase binding;nucleic acid binding;nucleoside-triphosphatase activity;nucleotide binding;protein binding;protein kinase bind…	cell cortex part;cell part;cell projection membrane;cell projection part;cortical actin cytoskeleton;cortical cytoskeleton;cytoplasm;cytoplasmic part;cytoskeletal part;cytoskeleton;cytosol;eukaryotic translation elongation factor 1 complex;extracellular membrane-bounded organelle;extracellular organelle;extracellular region part;extracellular space;extracellular vesicular exosome;intracellular me…	RNA transport	Nop56p-associated pre-rRNA complex;SNW1 complex	REACT_1404;REACT_1477;REACT_264071	1	1	1	1	1	1	1	1	2.49372	0.0014	1.65815	3.01373	P68104	P68104	P68104	EF1A1_HUMAN	>sp|P68104|EF1A1_HUMAN Elongation factor 1-alpha 1 OS=Homo sapiens OX=9606 GN=EEF1A1 PE=1 SV=1
PBXIP1	Pre-B-cell leukemia transcription factor-interacting protein 1	3.261	1.70531	+	13.9231	14.0816	13.7745	14.1076	15.8214	15.5984	15.6099	15.8033	15533.6	17337.4	14013.2	17652.7	57905	49611.9	50009	57183.1	16435.5	53596	3.261	+	PD_HC	biological regulation;cell differentiation;cellular developmental process;cellular process;developmental process;multicellular organismal development;multicellular organismal process;negative regulation of biological process;negative regulation of biosynthetic process;negative regulation of cellular biosynthetic process;negative regulation of cellular macromolecule biosynthetic process;negative r…	protein binding transcription factor activity;transcription cofactor activity;transcription corepressor activity;transcription factor binding transcription factor activity	cell part;cytoplasmic part;cytoskeletal part;cytosol;intracellular membrane-bounded organelle;intracellular organelle;intracellular organelle part;intracellular part;macromolecular complex;membrane-bounded organelle;microtubule;nucleus;organelle;organelle part;protein complex				25	25	25	25	25	25	25	25	5.68158	0.000839506	1.73655	5.82624	Q96AQ6	Q96AQ6	Q96AQ6	PBIP1_HUMAN	>sp|Q96AQ6|PBIP1_HUMAN Pre-B-cell leukemia transcription factor-interacting protein 1 OS=Homo sapiens OX=9606 GN=PBXIP1 PE=1 SV=1
LLGL1	Lethal(2) giant larvae protein homolog 1	3.25469	1.70252	+	14.5205	14.3455	14.2998	14.3694	15.9934	16.1322	16.1237	15.8267	23502.1	20817.4	20168.3	21165.1	65236.9	71825.1	71403.1	58118.1	20991.2	68320	3.25469	+	PD_HC	actin cytoskeleton organization;actin filament-based process;anatomical structure morphogenesis;axonogenesis;biological regulation;cell part morphogenesis;cell projection morphogenesis;cell projection organization;cellular component assembly;cellular component morphogenesis;cellular component organization;cellular component organization at cellular level;cellular component organization or biogene…	binding;enzyme activator activity;enzyme binding;enzyme regulator activity;GTPase activator activity;GTPase regulator activity;kinase binding;nucleoside-triphosphatase regulator activity;protein binding;protein kinase binding;structural molecule activity	axon;cell cortex part;cell part;cell projection;cortical actin cytoskeleton;cortical cytoskeleton;cytoplasm;cytoplasmic part;cytoskeletal part;cytoskeleton;early endosome membrane;endosomal part;endosome membrane;Golgi apparatus part;Golgi cis cisterna;Golgi cisterna;Golgi membrane;intracellular non-membrane-bounded organelle;intracellular organelle;intracellular organelle part;intracellular part…	Tight junction	LLGL1-PAR-6B-PRKCI complex		32	32	32	32	32	32	32	32	5.86256	0.00073913	1.63518	5.71653	Q15334	Q15334	Q15334	L2GL1_HUMAN	>sp|Q15334|L2GL1_HUMAN Lethal(2) giant larvae protein homolog 1 OS=Homo sapiens OX=9606 GN=LLGL1 PE=1 SV=3
MAB21L1	Putative nucleotidyltransferase MAB21L1	3.22935	1.69124	+	10.8059	10.2106	10.6206	10.2265	11.21	12.4582	12.2184	12.032	1790.19	1184.94	1574.41	1198.07	2368.9	5627.19	4765.46	4187.87	1386.24	4476.66	3.22935	+	PD_HC	anatomical structure development;anatomical structure morphogenesis;biological regulation;camera-type eye development;developmental process;eye development;organ development;positive regulation of biological process;positive regulation of cell proliferation;positive regulation of cellular process;regulation of biological process;regulation of cell proliferation;regulation of cellular process;sens…		cell part;intracellular membrane-bounded organelle;intracellular organelle;intracellular part;membrane-bounded organelle;nucleus;organelle				1	1	1	1	1	1	1	1	2.56893	0.00155746	1.51377	2.97612	Q13394	Q13394	Q13394	MB211_HUMAN	>sp|Q13394|MB211_HUMAN Putative nucleotidyltransferase MAB21L1 OS=Homo sapiens OX=9606 GN=MAB21L1 PE=1 SV=1
PCP4L1	Purkinje cell protein 4-like protein 1	3.22699	1.69019	+	10.6983	10.7108	10.5968	10.984	12.1731	12.5138	12.5025	12.2783	1661.53	1675.99	1548.65	2025.41	4618.15	5848.29	5802.67	4967.49	1668.76	5385.08	3.22699	+	PD_HC							1	1	1	1	1	1	1	1	5.02627	0.000544	1.61948	5.08886	A6NKN8	A6NKN8	A6NKN8	PC4L1_HUMAN	>sp|A6NKN8|PC4L1_HUMAN Purkinje cell protein 4-like protein 1 OS=Homo sapiens OX=9606 GN=PCP4L1 PE=3 SV=3
NOVA1	RNA-binding protein Nova-1	3.22409	1.68889	+	13.8823	14.0525	14.0449	14.0885	15.7135	15.7762	15.7613	15.7062	15100.4	16991.2	16901.9	17420.5	53732.2	56118.9	55542.3	53461	16946.6	54637.3	3.22409	+	PD_HC	behavior;biological regulation;cell communication;cell-cell signaling;cellular macromolecule metabolic process;cellular metabolic process;cellular nitrogen compound metabolic process;cellular process;locomotory behavior;macromolecule metabolic process;metabolic process;mRNA metabolic process;mRNA processing;nitrogen compound metabolic process;nuclear mRNA splicing, via spliceosome;nucleic acid me…	binding;mRNA binding;nucleic acid binding;RNA binding	cell part;intracellular membrane-bounded organelle;intracellular non-membrane-bounded organelle;intracellular organelle;intracellular organelle part;intracellular part;membrane-bounded organelle;non-membrane-bounded organelle;nuclear part;nucleolus;nucleus;organelle;organelle part				11	11	11	11	11	11	11	11	7.44824	0.00128302	1.72225	6.91489	P51513	P51513	P51513	NOVA1_HUMAN	>sp|P51513|NOVA1_HUMAN RNA-binding protein Nova-1 OS=Homo sapiens OX=9606 GN=NOVA1 PE=1 SV=2
SYNE2	Nesprin-2	3.21191	1.68343	+	11.5813	10.8786	11.0605	10.9348	12.7323	12.6527	12.7116	12.5695	3064.21	1882.72	2135.71	1957.5	6804.63	6439.35	6707.69	6078.5	2046.61	6573.52	3.21191	+	PD_HC	actin filament-based movement;actin filament-based process;ameboidal cell migration;biological regulation;cell migration;cell motility;cellular component movement;cellular component organization;cellular component organization at cellular level;cellular component organization or biogenesis;cellular component organization or biogenesis at cellular level;cellular localization;cellular macromolecule…	actin binding;binding;cytoskeletal protein binding;protein binding	adherens junction;aggresome;anchoring junction;cell junction;cell part;cell projection membrane;cell projection part;cell-substrate adherens junction;cell-substrate junction;contractile fiber part;cytoplasm;cytoplasmic part;cytoskeleton;endoplasmic reticulum;endoplasmic reticulum membrane;endoplasmic reticulum part;envelope;extracellular membrane-bounded organelle;extracellular organelle;extracel…			REACT_75792	31	31	31	31	31	31	31	31	4.09483	0.000304933	1.55269	4.25998	Q8WXH0	Q8WXH0	Q8WXH0	SYNE2_HUMAN	>sp|Q8WXH0|SYNE2_HUMAN Nesprin-2 OS=Homo sapiens OX=9606 GN=SYNE2 PE=1 SV=3
KRIT1	Krev interaction trapped protein 1	3.21101	1.68303	+	6.47284	8.88769	6.75067	7.26371	8.58793	8.82791	8.56696	8.99006	88.8217	473.654	107.685	153.672	384.791	454.429	379.238	508.485	130.678	419.61	3.21101	+	PD_HC	anatomical structure formation involved in morphogenesis;angiogenesis;biological regulation;cell redox homeostasis;cellular homeostasis;cellular process;cellular response to stimulus;developmental process;homeostatic process;intracellular signal transduction;negative regulation of angiogenesis;negative regulation of apoptosis;negative regulation of biological process;negative regulation of cell d…	binding;cytoskeletal protein binding;enzyme regulator activity;GTPase regulator activity;lipid binding;microtubule binding;nucleoside-triphosphatase regulator activity;phosphatidylinositol binding;phosphatidylinositol-4,5-bisphosphate binding;phospholipid binding;protein binding;protein complex binding;tubulin binding	cell junction;cell part;cell-cell junction;cytoplasm;cytoskeletal part;extracellular region part;extracellular space;intracellular organelle part;intracellular part;macromolecular complex;membrane;microtubule;organelle part;plasma membrane;protein complex				1	1	1	1	1	1	1	1	1.3597	0.00894366	1.39948	1.86717	O00522	O00522	O00522	KRIT1_HUMAN	>sp|O00522|KRIT1_HUMAN Krev interaction trapped protein 1 OS=Homo sapiens OX=9606 GN=KRIT1 PE=1 SV=2
WDR35	WD repeat-containing protein 35	3.20253	1.67921	+	9.80461	9.77861	10.2902	10.1692	11.5582	11.6867	11.6754	11.6798	894.297	878.324	1252.16	1151.42	3015.54	3296.46	3270.74	3280.73	1022.86	3275.73	3.20253	+	PD_HC	anatomical structure formation involved in morphogenesis;cell projection assembly;cell projection organization;cellular component assembly;cellular component assembly at cellular level;cellular component assembly involved in morphogenesis;cellular component movement;cellular component organization;cellular component organization at cellular level;cellular component organization or biogenesis;cell…		axoneme;axoneme part;cell part;cell projection;cell projection part;centrosome;cilium;cytoplasmic part;cytoskeletal part;intracellular non-membrane-bounded organelle;intracellular organelle;intracellular organelle part;intracellular part;intraflagellar transport particle A;macromolecular complex;microtubule organizing center;non-membrane-bounded organelle;organelle;organelle part;primary cilium;p…			REACT_268024;REACT_268323	11	11	11	11	11	11	11	11	4.76782	0.000468966	1.63934	4.92921	Q9P2L0	Q9P2L0	Q9P2L0	WDR35_HUMAN	>sp|Q9P2L0|WDR35_HUMAN WD repeat-containing protein 35 OS=Homo sapiens OX=9606 GN=WDR35 PE=1 SV=3
HSPB8	Heat shock protein beta-8	3.13636	1.64909	+	12.6945	11.3734	11.1452	11.4166	13.0457	13.0428	13.1858	12.5539	6628.65	2652.98	2264.85	2733.63	8455.65	8438.67	9317.97	6013.13	2693.3	8447.16	3.13636	+	PD_HC		binding;identical protein binding;protein binding	cell part;cytoplasm;cytoplasmic part;Golgi apparatus;intracellular;intracellular membrane-bounded organelle;intracellular organelle;intracellular organelle part;intracellular part;membrane-bounded organelle;nuclear part;nucleoplasm;nucleus;organelle;organelle part		BAG3-HSC70-HSPB8-CHIP complex		4	4	4	4	4	4	4	4	1.86346	0.00366635	1.29965	2.25199	Q9UJY1	Q9UJY1	Q9UJY1	HSPB8_HUMAN	>sp|Q9UJY1|HSPB8_HUMAN Heat shock protein beta-8 OS=Homo sapiens OX=9606 GN=HSPB8 PE=1 SV=1
FHL1	Four and a half LIM domains protein 1	3.13419	1.64809	+	15.4867	16.2092	15.9818	16.0855	17.7105	17.636	17.6543	17.718	45915.7	75762.7	64714.4	69537.3	214482	203688	206288	215600	67125.9	210385	3.13419	+	PD_HC	anatomical structure development;anatomical structure morphogenesis;biological regulation;cell differentiation;cellular developmental process;cellular process;developmental process;muscle organ development;muscle structure development;negative regulation of biological process;negative regulation of cell cycle;negative regulation of cell cycle process;negative regulation of cell growth;negative re…	binding;cation binding;ion binding;ion channel binding;metal ion binding;protein binding;transition metal ion binding;zinc ion binding	adherens junction;anchoring junction;cell junction;cell part;cell-substrate adherens junction;cell-substrate junction;cytoplasm;cytoplasmic part;cytosol;focal adhesion;intracellular membrane-bounded organelle;intracellular organelle;intracellular part;membrane;membrane-bounded organelle;nucleus;organelle;plasma membrane		RBP-Jkappa-RING1-KyoT2 complex		13	13	13	13	13	13	13	13	4.44989	0.00043038	1.73893	4.83526	Q13642	Q13642	Q13642	FHL1_HUMAN	>sp|Q13642|FHL1_HUMAN Four and a half LIM domains protein 1 OS=Homo sapiens OX=9606 GN=FHL1 PE=1 SV=4
PLCD1	1-phosphatidylinositol 4,5-bisphosphate phosphodiesterase delta-1	3.11507	1.63926	+	14.2718	13.0887	12.8401	12.7764	14.6224	14.5955	14.7541	14.3992	19780.6	8711.47	7332.55	7015.84	25222.1	24756.2	27632.9	21606.8	8022.01	24989.1	3.11507	+	PD_HC	anatomical structure development;anatomical structure formation involved in morphogenesis;angiogenesis;biological regulation;blood vessel development;catabolic process;cellular lipid metabolic process;cellular metabolic process;cellular process;cellular response to stimulus;developmental process;embryonic organ development;inositol phosphate metabolic process;intracellular signal transduction;lab…	binding;calcium ion binding;catalytic activity;cation binding;GTPase activating protein binding;hydrolase activity;hydrolase activity, acting on ester bonds;ion binding;lipase activity;lipid binding;metal ion binding;molecular transducer activity;phosphatidic acid binding;phosphatidylinositol phospholipase C activity;phosphatidylserine binding;phospholipase activity;phospholipase C activity;phosp…	cell part;cytoplasm;cytoplasmic part;cytosol;extracellular membrane-bounded organelle;extracellular organelle;extracellular region part;extracellular vesicular exosome;intracellular part;membrane;membrane-bounded organelle;membrane-bounded vesicle;organelle;plasma membrane;vesicle	Calcium signaling pathway;Inositol phosphate metabolism;Phosphatidylinositol signaling system		REACT_150312	16	16	16	16	16	16	16	16	2.03752	0.00270824	1.34855	2.42245	P51178	P51178	P51178	PLCD1_HUMAN	>sp|P51178|PLCD1_HUMAN 1-phosphatidylinositol 4,5-bisphosphate phosphodiesterase delta-1 OS=Homo sapiens OX=9606 GN=PLCD1 PE=1 SV=2
ABCA8	ABC-type organic anion transporter ABCA8	3.10889	1.6364	+	14.1352	14.6515	14.5825	14.6482	16.1893	16.3	16.4226	16.2026	17993.6	25736	24534.1	25677.2	74724.8	80684.3	87840.6	75416.9	25105.6	78050.6	3.10889	+	PD_HC	cellular process;establishment of localization;lipid transport;organic substance transport;transmembrane transport;transport	active transmembrane transporter activity;adenyl nucleotide binding;adenyl ribonucleotide binding;ATP binding;ATPase activity;ATPase activity, coupled;ATPase activity, coupled to movement of substances;ATPase activity, coupled to transmembrane movement of substances;binding;catalytic activity;hydrolase activity;hydrolase activity, acting on acid anhydrides;hydrolase activity, acting on acid anhyd…	cell part;cytoplasmic part;integral to membrane;intracellular organelle part;intracellular part;intrinsic to membrane;membrane;membrane part;mitochondrial inner membrane;mitochondrial membrane;mitochondrial part;organelle inner membrane;organelle membrane;organelle part;plasma membrane	ABC transporters		REACT_15480	21	21	21	21	21	21	21	21	4.91623	0.000618182	1.77425	5.29162	O94911	O94911	O94911	ABCA8_HUMAN	>sp|O94911|ABCA8_HUMAN ABC-type organic anion transporter ABCA8 OS=Homo sapiens OX=9606 GN=ABCA8 PE=1 SV=4
DYNC2H1	Cytoplasmic dynein 2 heavy chain 1	3.10534	1.63475	+	14.3691	14.5561	14.6811	14.9204	16.1663	16.3528	16.338	16.1308	21160.7	24089.2	26269.5	31009	73543	83691.9	82837.7	71755.4	25179.3	78190.3	3.10534	+	PD_HC	anatomical structure development;anatomical structure formation involved in morphogenesis;anatomical structure morphogenesis;antigen processing and presentation;antigen processing and presentation of exogenous antigen;antigen processing and presentation of exogenous peptide antigen;antigen processing and presentation of exogenous peptide antigen via MHC class II;antigen processing and presentatio…	adenyl nucleotide binding;adenyl ribonucleotide binding;ATP binding;ATPase activity;binding;catalytic activity;hydrolase activity;hydrolase activity, acting on acid anhydrides;hydrolase activity, acting on acid anhydrides, in phosphorus-containing anhydrides;microtubule motor activity;motor activity;nucleoside-triphosphatase activity;nucleotide binding;purine nucleotide binding;purine ribonucleos…	apical part of cell;axoneme;cell part;cell projection;cell projection part;cilium;cytoplasmic part;cytoskeletal part;cytosol;dynein complex;extracellular membrane-bounded organelle;extracellular organelle;extracellular region part;extracellular vesicular exosome;Golgi apparatus;intracellular membrane-bounded organelle;intracellular organelle;intracellular organelle part;intracellular part;macromo…	Phagosome;Vasopressin-regulated water reabsorption		REACT_121399;REACT_268024;REACT_268323	17	17	17	17	17	17	17	17	4.79768	0.000462585	1.6153	4.90833	Q8NCM8	Q8NCM8	Q8NCM8	DYHC2_HUMAN	>sp|Q8NCM8|DYHC2_HUMAN Cytoplasmic dynein 2 heavy chain 1 OS=Homo sapiens OX=9606 GN=DYNC2H1 PE=1 SV=4
DERL3;DERL2	Derlin-3;Derlin-2	3.09578	1.6303	+	11.0601	11.445	12.1525	11.2255	13.2369	13.1805	12.6112	12.7228	2135.12	2787.97	4552.68	2394.49	9653.93	9283.8	6256.76	6759.96	2591.23	8021.88	3.09578	+	PD_HC	behavior;behavioral interaction between organisms;biological regulation;carbohydrate metabolic process;catabolic process;cellular carbohydrate metabolic process;cellular catabolic process;cellular macromolecule catabolic process;cellular macromolecule metabolic process;cellular metabolic process;cellular process;cellular protein metabolic process;cellular response to chemical stimulus;cellular re…		cell part;cytoplasmic part;early endosome;endoplasmic reticulum;endoplasmic reticulum membrane;endoplasmic reticulum part;endosome;integral to endoplasmic reticulum membrane;integral to membrane;integral to organelle membrane;intracellular membrane-bounded organelle;intracellular organelle;intracellular organelle part;intracellular part;intrinsic to endoplasmic reticulum membrane;intrinsic to mem…	Protein processing in endoplasmic reticulum	p97/VCP-VIMP-DERL1-DERL2-HRD1-SEL1L complex;p97/VCP-VIMP-DERL2 complex	REACT_263883;REACT_264605	1	1	1	1	1	1	1	1	2.65075	0.00148673	1.46707	3.00624	Q96Q80;Q9GZP9	Q96Q80;Q9GZP9	Q96Q80;Q9GZP9	DERL3_HUMAN;DERL2_HUMAN	>sp|Q96Q80|DERL3_HUMAN Derlin-3 OS=Homo sapiens OX=9606 GN=DERL3 PE=1 SV=2;>sp|Q9GZP9|DERL2_HUMAN Derlin-2 OS=Homo sapiens OX=9606 GN=DERL2 PE=1 SV=1
CFB	Complement factor B	3.09247	1.62876	+	10.8188	10.8958	11.0513	9.49652	12.3877	12.6918	12.5791	11.9862	1806.27	1905.3	2122.13	722.333	5358.82	6616.26	6119.08	4057.01	1855.78	5738.95	3.09247	+	PD_HC	activation of immune response;biological regulation;complement activation;complement activation, alternative pathway;defense response;humoral immune response;immune effector process;immune response;immune system process;innate immune response;macromolecule metabolic process;metabolic process;positive regulation of biological process;positive regulation of immune response;positive regulation of im…	binding;catalytic activity;complement binding;endopeptidase activity;hydrolase activity;peptidase activity;peptidase activity, acting on L-amino acid peptides;protein binding;serine hydrolase activity;serine-type endopeptidase activity;serine-type peptidase activity	blood microparticle;cell part;extracellular membrane-bounded organelle;extracellular organelle;extracellular region;extracellular region part;extracellular space;extracellular vesicular exosome;membrane;membrane-bounded organelle;membrane-bounded vesicle;organelle;plasma membrane;vesicle	Complement and coagulation cascades;Staphylococcus aureus infection		REACT_118707;REACT_7972;REACT_8001	1	1	1	1	1	1	1	1	2.48398	0.00112377	1.8456	3.11976	P00751	P00751	P00751	CFAB_HUMAN	>sp|P00751|CFAB_HUMAN Complement factor B OS=Homo sapiens OX=9606 GN=CFB PE=1 SV=2
TLE3	Transducin-like enhancer protein 3	3.07533	1.62074	+	11.7869	10.3167	10.7617	10.8714	12.0911	12.5054	12.6542	12.368	3533.54	1275.37	1736.18	1873.34	4362.99	5814.34	6446.05	5286.14	1804.76	5550.24	3.07533	+	PD_HC	anatomical structure morphogenesis;biological regulation;biosynthetic process;cell surface receptor linked signaling pathway;cellular biosynthetic process;cellular macromolecule biosynthetic process;cellular macromolecule metabolic process;cellular metabolic process;cellular nitrogen compound metabolic process;cellular process;cellular response to stimulus;developmental process;macromolecule bios…		cell part;intracellular membrane-bounded organelle;intracellular organelle;intracellular organelle part;intracellular part;membrane-bounded organelle;nuclear part;nucleoplasm;nucleus;organelle;organelle part		NK-3-Groucho complex;NK-3-Groucho-HIPK2-SIN3A-RbpA48-HDAC1 complex;TLE-Histone H3 complex	REACT_118780;REACT_264178;REACT_264242;REACT_264567	5	5	5	5	5	5	5	5	2.36062	0.00164359	1.47048	2.76968	Q04726	Q04726	Q04726	TLE3_HUMAN	>sp|Q04726|TLE3_HUMAN Transducin-like enhancer protein 3 OS=Homo sapiens OX=9606 GN=TLE3 PE=1 SV=2
CPNE2	Copine-2	3.06795	1.61728	+	4.39202	8.09368	7.88343	8.40088	10.7397	9.81283	8.99251	9.37311	20.9957	273.175	236.129	338	1709.9	899.407	509.349	663.113	254.652	781.26	3.06795	+	PD_HC			extracellular membrane-bounded organelle;extracellular organelle;extracellular region part;extracellular vesicular exosome;membrane-bounded organelle;membrane-bounded vesicle;organelle;vesicle				2	2	2	2	2	2	2	2	1.33635	0.00518443	2.53703	2.09324	Q96FN4	Q96FN4	Q96FN4	CPNE2_HUMAN	>sp|Q96FN4|CPNE2_HUMAN Copine-2 OS=Homo sapiens OX=9606 GN=CPNE2 PE=1 SV=3
IFT81	Intraflagellar transport protein 81 homolog	3.03626	1.6023	+	10.1367	8.98747	9.67228	9.11412	11.1608	11.0871	10.9545	10.8295	1125.77	507.572	815.918	554.145	2289.47	2175.45	1984.42	1819.72	685.031	2079.94	3.03626	+	PD_HC	anatomical structure formation involved in morphogenesis;cell projection assembly;cell projection organization;cellular component assembly;cellular component assembly at cellular level;cellular component assembly involved in morphogenesis;cellular component movement;cellular component organization;cellular component organization at cellular level;cellular component organization or biogenesis;cell…	binding;cytoskeletal protein binding;protein binding;tubulin binding	axoneme part;cell part;cell projection;cell projection part;centrosome;cilium;cytoplasmic part;cytoskeletal part;intracellular non-membrane-bounded organelle;intracellular organelle;intracellular organelle part;intracellular part;intraflagellar transport particle B;macromolecular complex;microtubule organizing center;motile cilium;non-membrane-bounded organelle;organelle;organelle part;primary ci…			REACT_268024	6	6	6	6	6	6	6	6	2.84387	0.00101468	1.53034	3.22017	Q8WYA0	Q8WYA0	Q8WYA0	IFT81_HUMAN	>sp|Q8WYA0|IFT81_HUMAN Intraflagellar transport protein 81 homolog OS=Homo sapiens OX=9606 GN=IFT81 PE=1 SV=1
ITGA7	Integrin alpha-7	3.01588	1.59258	+	11.6705	11.8315	11.6839	11.7037	13.2997	13.273	13.2686	13.305	3259.65	3644.49	3290.06	3335.53	10083.4	9898.54	9868.4	10120.5	3312.8	9990.99	3.01588	+	PD_HC	anatomical structure development;anatomical structure morphogenesis;biological adhesion;biological regulation;blood vessel morphogenesis;cell adhesion;cell differentiation;cell migration;cell motility;cell surface receptor linked signaling pathway;cell-cell adhesion;cell-matrix adhesion;cell-substrate adhesion;cellular component movement;cellular component organization;cellular component organiza…	binding;cation binding;ion binding;metal ion binding	adherens junction;alpha7-beta1 integrin complex;anchoring junction;cell junction;cell part;cell surface;cell-substrate adherens junction;cell-substrate junction;cytoplasm;integrin complex;intracellular part;macromolecular complex;membrane;membrane part;muscle tendon junction;neuromuscular junction;plasma membrane;plasma membrane part;protein complex;receptor complex;sarcolemma;synapse	Arrhythmogenic right ventricular cardiomyopathy (ARVC);Dilated cardiomyopathy;ECM-receptor interaction;Focal adhesion;Hypertrophic cardiomyopathy (HCM);Regulation of actin cytoskeleton	ITGA7-ITGB1-CD151 complex;ITGA7-ITGB1-CD9 complex;ITGA7-ITGB1-ITGB1BP3 complex	REACT_13552;REACT_163906;REACT_169262	10	10	10	10	10	10	10	10	7.85383	0.00115254	1.5642	6.56904	Q13683	Q13683	Q13683	ITA7_HUMAN	>sp|Q13683|ITA7_HUMAN Integrin alpha-7 OS=Homo sapiens OX=9606 GN=ITGA7 PE=1 SV=3
TTC38	Tetratricopeptide repeat protein 38	2.99749	1.58375	+	11.9856	11.5478	11.5403	11.4301	13.2066	13.1691	13.0853	12.938	4055.32	2993.88	2978.35	2759.33	9453.28	9210.73	8690.96	7847.41	2986.12	8950.85	2.99749	+	PD_HC			extracellular membrane-bounded organelle;extracellular organelle;extracellular region part;extracellular vesicular exosome;membrane-bounded organelle;membrane-bounded vesicle;organelle;vesicle				5	5	5	5	5	5	5	5	4.4269	0.000330097	1.47381	4.37918	Q5R3I4	Q5R3I4	Q5R3I4	TTC38_HUMAN	>sp|Q5R3I4|TTC38_HUMAN Tetratricopeptide repeat protein 38 OS=Homo sapiens OX=9606 GN=TTC38 PE=1 SV=1
IFT57	Intraflagellar transport protein 57 homolog	2.99186	1.58104	+	8.84353	7.97181	9.78614	9.77993	10.9664	11.0758	10.9685	10.917	459.375	251.046	882.921	879.128	2000.85	2158.48	2003.77	1933.5	669.252	2002.31	2.99186	+	PD_HC	activation of caspase activity;anatomical structure formation involved in morphogenesis;anatomical structure morphogenesis;apoptosis;biological regulation;biosynthetic process;cell death;cell projection assembly;cell projection organization;cell surface receptor linked signaling pathway;cellular biosynthetic process;cellular component assembly;cellular component assembly at cellular level;cellula…	binding;DNA binding;nucleic acid binding	axoneme part;cell part;cell projection;cell projection part;centrosome;cilium;cytoplasmic part;cytoskeletal part;dendrite terminus;Golgi apparatus;intracellular membrane-bounded organelle;intracellular non-membrane-bounded organelle;intracellular organelle;intracellular organelle part;intracellular part;intraflagellar transport particle B;macromolecular complex;membrane-bounded organelle;microtub…	Huntington's disease		REACT_268024;REACT_268323	1	1	1	1	1	1	1	1	2.30411	0.00153898	1.88658	2.96459	Q9NWB7	Q9NWB7	Q9NWB7	IFT57_HUMAN	>sp|Q9NWB7|IFT57_HUMAN Intraflagellar transport protein 57 homolog OS=Homo sapiens OX=9606 GN=IFT57 PE=1 SV=1
ARHGDIG	Rho GDP-dissociation inhibitor 3	2.98873	1.57953	+	9.00266	0.524206	5.9453	7.07382	7.71494	9.73236	8.55728	6.61835	512.945	1.43814	61.6189	134.72	210.101	850.614	376.702	98.2476	98.1694	293.402	2.98873	+	PD_HC	biological regulation;cellular process;cellular response to stimulus;intracellular signal transduction;negative regulation of biological process;negative regulation of cell adhesion;negative regulation of cellular process;Ras protein signal transduction;regulation of biological process;regulation of cell adhesion;regulation of cellular process;regulation of localization;regulation of protein loca…	enzyme activator activity;enzyme regulator activity;GDP-dissociation inhibitor activity;GTPase activator activity;GTPase regulator activity;nucleoside-triphosphatase regulator activity;Rho GDP-dissociation inhibitor activity;small GTPase regulator activity	cell part;cytoplasmic membrane-bounded vesicle;cytoplasmic part;cytoplasmic vesicle;cytosol;intracellular membrane-bounded organelle;intracellular organelle;intracellular part;membrane;membrane-bounded organelle;membrane-bounded vesicle;organelle;vesicle			REACT_11051	1	1	1	1	1	0	1	1	0.619372	0.0446161	2.51924	1.18114	Q99819	Q99819	Q99819	GDIR3_HUMAN	>sp|Q99819|GDIR3_HUMAN Rho GDP-dissociation inhibitor 3 OS=Homo sapiens OX=9606 GN=ARHGDIG PE=1 SV=2
B3GLCT	Beta-1,3-glucosyltransferase	2.9635	1.5673	+	13.1943	13.2272	13.1035	13.2117	14.8261	14.7348	14.805	14.652	9373.03	9589.23	8801.29	9486.76	29047	27265.7	28625.2	25744.9	9429.9	27945.5	2.9635	+	PD_HC	alcohol metabolic process;carbohydrate metabolic process;cellular carbohydrate metabolic process;cellular macromolecule metabolic process;cellular metabolic process;cellular process;cellular protein metabolic process;fucose metabolic process;glycosylation;hexose metabolic process;macromolecule glycosylation;macromolecule metabolic process;macromolecule modification;metabolic process;monosaccharid…	catalytic activity;transferase activity;transferase activity, transferring glycosyl groups	cell part;cytoplasmic part;endoplasmic reticulum membrane;endoplasmic reticulum part;integral to membrane;intracellular organelle part;intracellular part;intrinsic to membrane;membrane;membrane part;organelle membrane;organelle part	Other types of O-glycan biosynthesis		REACT_264269	9	9	9	9	9	9	9	9	7.2594	0.00101493	1.57031	6.329	Q6Y288	Q6Y288	Q6Y288	B3GLT_HUMAN	>sp|Q6Y288|B3GLT_HUMAN Beta-1,3-glucosyltransferase OS=Homo sapiens OX=9606 GN=B3GLCT PE=1 SV=2
FEZ2	Fasciculation and elongation protein zeta-2	2.92703	1.54944	+	10.3437	9.97651	10.0208	9.64452	11.5133	11.4349	11.7887	11.5824	1299.46	1007.46	1038.87	800.368	2923.13	2768.52	3537.96	3066.55	1023.17	2994.84	2.92703	+	PD_HC	anatomical structure development;axon guidance;biological regulation;cellular process;cellular response to stimulus;chemotaxis;developmental process;locomotion;nervous system development;regulation of biological process;regulation of cellular process;response to chemical stimulus;response to external stimulus;response to stimulus;signal transduction;system development;taxis						5	5	5	5	5	5	5	5	4.18254	0.000326923	1.58342	4.37556	Q9UHY8	Q9UHY8	Q9UHY8	FEZ2_HUMAN	>sp|Q9UHY8|FEZ2_HUMAN Fasciculation and elongation protein zeta-2 OS=Homo sapiens OX=9606 GN=FEZ2 PE=1 SV=2
MOCS2	Molybdopterin synthase catalytic subunit	2.92136	1.54664	+	8.11455	8.18261	9.56893	0.630199	9.76488	10.0071	9.0546	9.62287	277.155	290.543	759.513	1.54778	870.005	1029.05	531.748	788.447	283.849	829.226	2.92136	+	PD_HC	aromatic compound biosynthetic process;biosynthetic process;cellular aromatic compound metabolic process;cellular biosynthetic process;cellular metabolic process;cellular nitrogen compound biosynthetic process;cellular nitrogen compound metabolic process;cellular process;coenzyme biosynthetic process;coenzyme metabolic process;cofactor biosynthetic process;cofactor metabolic process;heterocycle b…	catalytic activity;Mo-molybdopterin synthase activity	cell part;cytoplasm;cytoplasmic part;cytosol;intracellular membrane-bounded organelle;intracellular organelle;intracellular part;macromolecular complex;membrane-bounded organelle;molybdopterin synthase complex;nucleus;organelle;protein complex	Folate biosynthesis;Sulfur relay system	Molybdopterin synthase	REACT_25073	1	1	1	1	1	1	1	1	0.715487	0.0316348	2.9883	1.3365	O96007	O96007	O96007	MOC2B_HUMAN	>sp|O96007|MOC2B_HUMAN Molybdopterin synthase catalytic subunit OS=Homo sapiens OX=9606 GN=MOCS2 PE=1 SV=1
FMN2	Formin-2	2.91884	1.54539	+	12.78	11.9949	11.7488	12.7435	13.8607	14.1264	14.0578	13.4602	7033.37	4081.55	3441.45	6857.66	14876	17884.2	17053.7	11270	5469.6	15964.9	2.91884	+	PD_HC	actin cytoskeleton organization;actin filament bundle assembly;actin filament organization;actin filament-based process;biological regulation;cell cycle cytokinesis;cell cycle process;cellular component assembly;cellular component assembly at cellular level;cellular component movement;cellular component organization;cellular component organization at cellular level;cellular component organization…	actin binding;binding;cytoskeletal protein binding;protein binding	cell cortex;cell part;cell projection;cytoplasmic part;cytoplasmic vesicle membrane;cytoplasmic vesicle part;cytoskeletal part;cytosol;endoplasmic reticulum membrane;endoplasmic reticulum part;intracellular non-membrane-bounded organelle;intracellular organelle;intracellular organelle part;intracellular part;membrane;membrane part;microvillus;non-membrane-bounded organelle;nuclear part;nucleolus;…	Dorso-ventral axis formation			8	8	8	8	8	8	8	8	2.68321	0.00111284	1.5595	3.10886	Q9NZ56	Q9NZ56	Q9NZ56	FMN2_HUMAN	>sp|Q9NZ56|FMN2_HUMAN Formin-2 OS=Homo sapiens OX=9606 GN=FMN2 PE=1 SV=4
DDR1	Epithelial discoidin domain-containing receptor 1	2.8865	1.52932	+	13.3406	13.0341	13.2664	13.5121	14.8921	14.7243	14.9403	14.772	10373.4	8387.94	9853.36	11682.8	30406.7	27068	31439.7	27977.9	10113.4	29192.3	2.8865	+	PD_HC	anatomical structure development;anatomical structure morphogenesis;biological adhesion;biological regulation;body fluid secretion;branching involved in mammary gland duct morphogenesis;branching morphogenesis of a tube;cell adhesion;cell migration;cell motility;cell-matrix adhesion;cell-substrate adhesion;cellular component movement;cellular component organization;cellular component organization…	adenyl nucleotide binding;adenyl ribonucleotide binding;ATP binding;binding;catalytic activity;cation binding;collagen binding;ion binding;kinase activity;metal ion binding;molecular transducer activity;nucleotide binding;phosphotransferase activity, alcohol group as acceptor;protein binding;protein kinase activity;protein tyrosine kinase activity;purine nucleotide binding;purine ribonucleoside t…	cell part;extracellular membrane-bounded organelle;extracellular organelle;extracellular region part;extracellular space;extracellular vesicular exosome;integral to membrane;integral to plasma membrane;intrinsic to membrane;intrinsic to plasma membrane;macromolecular complex;membrane;membrane part;membrane-bounded organelle;membrane-bounded vesicle;organelle;plasma membrane;plasma membrane part;p…			REACT_163874	11	11	11	11	11	11	11	11	5.05992	0.000492754	1.54386	4.96047	Q08345	Q08345	Q08345	DDR1_HUMAN	>sp|Q08345|DDR1_HUMAN Epithelial discoidin domain-containing receptor 1 OS=Homo sapiens OX=9606 GN=DDR1 PE=1 SV=1
SOX2	Transcription factor SOX-2	2.88069	1.52641	+	10.7771	10.5987	7.32872	10.8434	12.0738	12.3036	12.2807	12.1505	1754.81	1550.7	160.755	1837.34	4310.98	5055.37	4975.76	4546.37	1652.75	4761.06	2.88069	+	PD_HC	adenohypophysis development;anatomical structure development;anatomical structure formation involved in morphogenesis;anatomical structure morphogenesis;biological regulation;biosynthetic process;branching morphogenesis of a tube;cell communication;cell cycle arrest;cell cycle process;cell differentiation;cell fate commitment;cell fate specification;cell-cell signaling;cell-cell signaling involve…	binding;chromatin binding;DNA binding;miRNA binding;nucleic acid binding;nucleic acid binding transcription factor activity;regulatory region DNA binding;regulatory region nucleic acid binding;RNA binding;RNA polymerase II core promoter proximal region sequence-specific DNA binding transcription factor activity;RNA polymerase II core promoter proximal region sequence-specific DNA binding transcri…	cell part;cytoplasm;cytoplasmic part;cytosol;intracellular membrane-bounded organelle;intracellular organelle;intracellular organelle part;intracellular part;macromolecular complex;membrane-bounded organelle;nuclear part;nucleoplasm;nucleoplasm part;nucleus;organelle;organelle part;protein complex;transcription factor complex		OCT1-SOX2 DNA-protein complex;OCT4-SOX2 DNA-protein complex;PAX6-SOX2 DNA-protein complex	REACT_263856;REACT_264178;REACT_264321;REACT_264617	1	1	1	1	1	1	1	1	1.45144	0.00410681	2.31518	2.1923	P48431	P48431	P48431	SOX2_HUMAN	>sp|P48431|SOX2_HUMAN Transcription factor SOX-2 OS=Homo sapiens OX=9606 GN=SOX2 PE=1 SV=1
WFS1	Wolframin	2.86486	1.51846	+	12.6483	11.9074	11.9594	11.8863	13.6529	13.3481	13.5491	13.3409	6419.74	3841.36	3982.34	3785.58	12880.5	10427.5	11986.3	10375.5	3911.85	11206.9	2.86486	+	PD_HC	anatomical structure development;behavior;biological regulation;calcium ion homeostasis;carbohydrate homeostasis;catabolic process;cation homeostasis;cellular calcium ion homeostasis;cellular catabolic process;cellular cation homeostasis;cellular chemical homeostasis;cellular divalent inorganic cation homeostasis;cellular homeostasis;cellular ion homeostasis;cellular macromolecule catabolic proce…	activating transcription factor binding;ATPase binding;binding;enzyme binding;protein binding;transcription factor binding;transporter activity;ubiquitin protein ligase binding	cell part;cell projection;cytoplasmic part;dendrite;endoplasmic reticulum;endoplasmic reticulum membrane;endoplasmic reticulum part;integral to endoplasmic reticulum membrane;integral to membrane;integral to organelle membrane;intracellular membrane-bounded organelle;intracellular organelle;intracellular organelle part;intracellular part;intrinsic to endoplasmic reticulum membrane;intrinsic to me…	Protein processing in endoplasmic reticulum		REACT_18273	11	11	11	11	11	11	11	11	3.34009	0.00100971	1.37241	3.44106	O76024	O76024	O76024	WFS1_HUMAN	>sp|O76024|WFS1_HUMAN Wolframin OS=Homo sapiens OX=9606 GN=WFS1 PE=1 SV=2
ITGA11	Integrin alpha-11	2.86374	1.5179	+	12.2205	12.4016	12.529	12.6372	13.9717	13.8026	13.9974	14.0655	4772.4	5410.7	5910.24	6370.54	16065.7	14288.8	16354.5	17145	5660.47	16210.1	2.86374	+	PD_HC	anatomical structure development;biological adhesion;biological regulation;cell adhesion;cell adhesion mediated by integrin;cell differentiation;cell migration;cell motility;cell surface receptor linked signaling pathway;cell-matrix adhesion;cell-substrate adhesion;cellular component movement;cellular component organization;cellular component organization at cellular level;cellular component orga…	binding;cation binding;collagen binding;ion binding;metal ion binding;protein binding	adherens junction;alpha11-beta1 integrin complex;anchoring junction;cell junction;cell part;cell-substrate adherens junction;cell-substrate junction;focal adhesion;integrin complex;macromolecular complex;membrane;membrane part;plasma membrane;plasma membrane part;protein complex;receptor complex	Arrhythmogenic right ventricular cardiomyopathy (ARVC);Dilated cardiomyopathy;ECM-receptor interaction;Focal adhesion;Hypertrophic cardiomyopathy (HCM);Regulation of actin cytoskeleton	ITGA11-ITGB1 complex;ITGA11-ITGB1-COL1A1 complex	REACT_13552	20	20	20	20	20	20	20	20	5.14061	0.000478873	1.51219	4.94919	Q9UKX5	Q9UKX5	Q9UKX5	ITA11_HUMAN	>sp|Q9UKX5|ITA11_HUMAN Integrin alpha-11 OS=Homo sapiens OX=9606 GN=ITGA11 PE=1 SV=2
PDIA5	Protein disulfide-isomerase A5	2.85599	1.51399	+	15.0814	15.0566	14.8779	15.0862	16.5489	16.6566	16.6164	16.5389	34670	34079.1	30108.9	34785.5	95877.2	103309	100470	95214.9	34374.6	98173.4	2.85599	+	PD_HC	biological regulation;cell redox homeostasis;cellular homeostasis;cellular macromolecule metabolic process;cellular metabolic process;cellular process;cellular protein metabolic process;cellular response to chemical stimulus;cellular response to organic substance;cellular response to stimulus;cellular response to stress;cellular response to topologically incorrect protein;cellular response to unf…	catalytic activity;intramolecular oxidoreductase activity;intramolecular oxidoreductase activity, interconverting keto- and enol-groups;intramolecular oxidoreductase activity, transposing S-S bonds;isomerase activity;oxidoreductase activity;protein disulfide isomerase activity	cell part;cytoplasmic part;endoplasmic reticulum;endoplasmic reticulum lumen;endoplasmic reticulum membrane;endoplasmic reticulum part;intracellular membrane-bounded organelle;intracellular organelle;intracellular organelle lumen;intracellular organelle part;intracellular part;membrane;membrane part;membrane-bounded organelle;membrane-enclosed lumen;organelle;organelle lumen;organelle membrane;or…			REACT_18273	24	24	24	24	24	24	24	24	6.81045	0.000906667	1.56467	6.0879	Q14554	Q14554	Q14554	PDIA5_HUMAN	>sp|Q14554|PDIA5_HUMAN Protein disulfide-isomerase A5 OS=Homo sapiens OX=9606 GN=PDIA5 PE=1 SV=1
TMEM231	Transmembrane protein 231	2.83916	1.50546	+	11.77	11.2383	11.6642	11.7343	13.0429	13.2422	13.366	13.1671	3492.39	2415.82	3245.44	3407.03	8439.26	9689.46	10557.6	9197.97	3326.24	9443.71	2.83916	+	PD_HC	anatomical structure formation involved in morphogenesis;biological regulation;cell projection assembly;cell projection organization;cell surface receptor linked signaling pathway;cellular component assembly;cellular component assembly at cellular level;cellular component assembly involved in morphogenesis;cellular component organization;cellular component organization at cellular level;cellular …		cell part;cell projection membrane;cell projection part;ciliary transition zone;cilium membrane;cilium part;integral to membrane;intracellular organelle part;intracellular part;intrinsic to membrane;membrane part;organelle part;plasma membrane part				5	5	5	5	5	5	5	5	4.56519	0.000390805	1.60288	4.70722	Q9H6L2	Q9H6L2	Q9H6L2	TM231_HUMAN	>sp|Q9H6L2|TM231_HUMAN Transmembrane protein 231 OS=Homo sapiens OX=9606 GN=TMEM231 PE=1 SV=1
EZR	Ezrin	2.83018	1.50089	+	17.4209	15.5317	15.3225	15.5618	17.0559	17.0395	17.0933	16.938	175474	47370.5	40976.2	48369.2	136250	134710	139829	125558	47869.8	135480	2.83018	+	PD_HC	actin cytoskeleton organization;actin cytoskeleton reorganization;actin filament bundle assembly;actin filament organization;actin filament-based process;anatomical structure development;axon guidance;biological adhesion;biological regulation;cell adhesion;cell development;cell projection assembly;cell projection organization;cell-cell adhesion;cellular component assembly;cellular component assem…	actin binding;actin filament binding;binding;cell adhesion molecule binding;cytoskeletal protein binding;protein binding	actin cytoskeleton;actin filament;adherens junction;anchoring junction;apical part of cell;apical plasma membrane;basolateral plasma membrane;brush border;cell body;cell cortex part;cell junction;cell part;cell periphery;cell pole;cell projection;cell projection membrane;cell projection part;cell tip;cell-substrate adherens junction;cell-substrate junction;cortical cytoskeleton;cytoplasm;cytoplas…	Gastric acid secretion;Leukocyte transendothelial migration;Pathogenic Escherichia coli infection;Regulation of actin cytoskeleton	(C-CFTR)2-NHERF-ezrin complex;C-CFTR-NHERF(PDZ1 domain)-ezrin complex;C-CFTR-NHERF(PDZ2 domain)-ezrin complex	REACT_22237;REACT_22365	31	31	31	31	31	31	31	31	1.14422	0.0183578	1.07249	1.55153	P15311	P15311	P15311	EZRI_HUMAN	>sp|P15311|EZRI_HUMAN Ezrin OS=Homo sapiens OX=9606 GN=EZR PE=1 SV=4
CRISPLD1	Cysteine-rich secretory protein LCCL domain-containing 1	2.81553	1.4934	+	14.908	12.9708	12.2425	12.1483	13.8239	15.1621	13.8779	14.3712	30743.6	8027.86	4845.74	4539.44	14501.4	36664.6	15054.4	21191.5	6436.8	18123	2.81553	+	PD_HC	anatomical structure morphogenesis;developmental process;face morphogenesis		extracellular membrane-bounded organelle;extracellular organelle;extracellular region part;extracellular vesicular exosome;membrane-bounded organelle;membrane-bounded vesicle;organelle;vesicle				3	3	3	3	3	3	3	3	0.880576	0.0297052	1.24138	1.36189	Q9H336	Q9H336	Q9H336	CRLD1_HUMAN	>sp|Q9H336|CRLD1_HUMAN Cysteine-rich secretory protein LCCL domain-containing 1 OS=Homo sapiens OX=9606 GN=CRISPLD1 PE=2 SV=1
NES	Nestin	2.81058	1.49087	+	15.439	15.6456	15.2536	15.276	16.8205	16.8367	16.8645	16.8684	44422.4	51261.9	39065.3	39676.6	115738	117045	119322	119645	42049.5	118183	2.81058	+	PD_HC	anatomical structure development;anatomical structure morphogenesis;biological regulation;brain development;camera-type eye development;cell cycle process;cell part morphogenesis;cell projection morphogenesis;cell projection organization;cell proliferation;cellular component morphogenesis;cellular component organization;cellular component organization at cellular level;cellular component organiza…	binding;intermediate filament binding;protein binding;protein complex binding;structural molecule activity	cell part;cytoplasm;cytoskeletal part;cytoskeleton;intermediate filament;intermediate filament cytoskeleton;intracellular non-membrane-bounded organelle;intracellular organelle;intracellular organelle part;intracellular part;macromolecular complex;non-membrane-bounded organelle;organelle;organelle part;protein complex				59	59	59	59	59	59	59	59	5.39054	0.000489209	1.44397	4.95595	P48681	P48681	P48681	NEST_HUMAN	>sp|P48681|NEST_HUMAN Nestin OS=Homo sapiens OX=9606 GN=NES PE=1 SV=2
PLEK	Pleckstrin	2.80952	1.49032	+	11.4234	9.62812	9.16601	8.23258	11.3499	10.2935	10.8063	10.9989	2746.54	791.321	574.439	300.783	2610.12	1255.02	1790.69	2046.44	682.88	1918.56	2.80952	+	PD_HC	actin cytoskeleton organization;actin cytoskeleton reorganization;actin filament-based process;biological adhesion;biological regulation;blood coagulation;cell activation;cell adhesion;cell differentiation;cell projection organization;cell surface receptor linked signaling pathway;cell-cell adhesion;cellular component organization;cellular component organization at cellular level;cellular compone…	binding;enzyme binding;identical protein binding;kinase binding;lipid binding;phosphatidylinositol binding;phosphatidylinositol-3,4-bisphosphate binding;phospholipid binding;protein binding;protein dimerization activity;protein homodimerization activity;protein kinase binding;protein kinase C binding	cell part;cell projection membrane;cell projection part;cytoplasm;cytoplasmic part;cytosol;extracellular region;intracellular part;leading edge membrane;membrane;membrane part;plasma membrane part;ruffle membrane			REACT_318	1	1	1	1	1	1	1	1	0.897112	0.0281383	1.24962	1.38062	P08567	P08567	P08567	PLEK_HUMAN	>sp|P08567|PLEK_HUMAN Pleckstrin OS=Homo sapiens OX=9606 GN=PLEK PE=1 SV=3
ARNT2	Aryl hydrocarbon receptor nuclear translocator 2	2.80006	1.48546	+	9.38433	9.37228	9.86304	10.5504	10.852	11.2932	10.9882	11.2571	668.29	662.731	931.26	1499.64	1848.32	2509.53	2031.32	2447.51	799.775	2239.41	2.80006	+	PD_HC	anatomical structure development;biological regulation;biosynthetic process;brain development;cellular biosynthetic process;cellular macromolecule biosynthetic process;cellular macromolecule metabolic process;cellular metabolic process;cellular nitrogen compound metabolic process;cellular process;central nervous system development;chordate embryonic development;developmental process;embryo develo…	aryl hydrocarbon receptor binding;binding;DNA binding;molecular transducer activity;nucleic acid binding;nucleic acid binding transcription factor activity;protein binding;protein dimerization activity;protein heterodimerization activity;receptor binding;sequence-specific DNA binding transcription factor activity;signal transducer activity;transcription factor binding	cell part;cytoplasm;intracellular membrane-bounded organelle;intracellular organelle;intracellular organelle part;intracellular part;macromolecular complex;membrane-bounded organelle;nuclear part;nucleoplasm part;nucleus;organelle;organelle part;protein complex;transcription factor complex	Pathways in cancer;Renal cell carcinoma			1	1	1	1	1	1	1	1	2.33763	0.00197597	1.30512	2.62603	Q9HBZ2	Q9HBZ2	Q9HBZ2	ARNT2_HUMAN	>sp|Q9HBZ2|ARNT2_HUMAN Aryl hydrocarbon receptor nuclear translocator 2 OS=Homo sapiens OX=9606 GN=ARNT2 PE=1 SV=2
JAM2	Junctional adhesion molecule B	2.78281	1.47654	+	12.9607	13.6119	13.6614	13.7628	15.0095	15.1159	15.2275	15.1109	7971.86	12519.6	12956.6	13900	32984.5	35509.1	38364.9	35386.2	12738.1	35447.6	2.78281	+	PD_HC	biological adhesion;biological regulation;blood coagulation;cell adhesion;cell migration;cell motility;cell-cell adhesion;cellular component movement;cellular component organization;cellular component organization at cellular level;cellular component organization or biogenesis;cellular component organization or biogenesis at cellular level;cellular process;coagulation;extracellular matrix organiz…		cell junction;cell part;cell-cell junction;integral to membrane;integral to plasma membrane;intrinsic to membrane;intrinsic to plasma membrane;membrane;membrane part;occluding junction;plasma membrane;plasma membrane part;tight junction	Cell adhesion molecules (CAMs);Epithelial cell signaling in Helicobacter pylori infection;Leukocyte transendothelial migration;Tight junction	ITGA4-ITGB1-JAM2 complex	REACT_12051;REACT_13552	8	8	8	8	8	8	8	8	3.87205	0.000283333	1.61676	4.1714	P57087	P57087	P57087	JAM2_HUMAN	>sp|P57087|JAM2_HUMAN Junctional adhesion molecule B OS=Homo sapiens OX=9606 GN=JAM2 PE=1 SV=1
DHFR;DHFR2	Dihydrofolate reductase;Dihydrofolate reductase 2, mitochondrial	2.77566	1.47283	+	10.2117	10.23	9.78953	9.16914	11.5292	11.4473	11.6814	11.1593	1185.85	1200.98	884.998	575.687	2955.53	2792.42	3284.37	2287.09	1035.42	2873.97	2.77566	+	PD_HC	amine biosynthetic process;amine metabolic process;aromatic compound biosynthetic process;biological regulation;biosynthetic process;carboxylic acid biosynthetic process;carboxylic acid metabolic process;cell cycle;cell cycle process;cellular amine metabolic process;cellular amino acid biosynthetic process;cellular amino acid metabolic process;cellular aromatic compound metabolic process;cellular…	binding;catalytic activity;coenzyme binding;cofactor binding;dihydrofolate reductase activity;drug binding;mRNA binding;NADP binding;nucleic acid binding;nucleotide binding;oxidoreductase activity;oxidoreductase activity, acting on the CH-NH group of donors;oxidoreductase activity, acting on the CH-NH group of donors, NAD or NADP as acceptor;RNA binding	cell part;cytoplasmic part;cytosol;intracellular membrane-bounded organelle;intracellular organelle;intracellular organelle lumen;intracellular organelle part;intracellular part;membrane;membrane-bounded organelle;membrane-enclosed lumen;mitochondrial inner membrane;mitochondrial matrix;mitochondrial membrane;mitochondrial part;mitochondrion;nuclear part;nucleoplasm;organelle;organelle inner memb…	Folate biosynthesis;One carbon pool by folate		REACT_111176;REACT_11167;REACT_471;REACT_683	1	1	1	1	1	1	1	1	2.97803	0.00113882	1.60421	3.39996	P00374;Q86XF0	P00374;Q86XF0	P00374;Q86XF0	DYR_HUMAN;DYR2_HUMAN	>sp|P00374|DYR_HUMAN Dihydrofolate reductase OS=Homo sapiens OX=9606 GN=DHFR PE=1 SV=2;>sp|Q86XF0|DYR2_HUMAN Dihydrofolate reductase 2, mitochondrial OS=Homo sapiens OX=9606 GN=DHFR2 PE=1 SV=1
GAS6	Growth arrest-specific protein 6	2.76919	1.46946	+	13.1282	12.7957	13.4501	13.3727	14.8655	14.7146	14.7355	14.6498	8953.28	7110.33	11191.4	10606.8	29851.2	26886.6	27278.9	25705.7	9780.03	27082.8	2.76919	+	PD_HC	activation of protein kinase activity;activation of protein kinase B activity;anatomical structure morphogenesis;apoptotic cell clearance;B cell chemotaxis;biological adhesion;biological regulation;blood coagulation;calcium ion transmembrane transport;calcium ion transport;carbohydrate homeostasis;cation transport;cell activation;cell adhesion;cell chemotaxis;cell communication;cell cycle arrest;…	binding;binding, bridging;calcium channel activity;calcium ion binding;caspase inhibitor activity;caspase regulator activity;cation binding;cation channel activity;cation transmembrane transporter activity;channel activity;cysteine-type endopeptidase inhibitor activity;endopeptidase inhibitor activity;endopeptidase regulator activity;enzyme activator activity;enzyme inhibitor activity;enzyme regu…	cell part;cytoplasm;cytoplasmic membrane-bounded vesicle lumen;cytoplasmic part;cytoplasmic vesicle part;endoplasmic reticulum lumen;endoplasmic reticulum part;extracellular membrane-bounded organelle;extracellular organelle;extracellular region;extracellular region part;extracellular space;extracellular vesicular exosome;Golgi apparatus part;Golgi lumen;intracellular organelle lumen;intracellula…			REACT_1050;REACT_12051;REACT_1906;REACT_318;REACT_733	9	9	9	9	9	9	9	9	4.25972	0.000331707	1.55464	4.39095	Q14393	Q14393	Q14393	GAS6_HUMAN	>sp|Q14393|GAS6_HUMAN Growth arrest-specific protein 6 OS=Homo sapiens OX=9606 GN=GAS6 PE=1 SV=3
ZNF512	Zinc finger protein 512	2.76604	1.46782	+	12.4623	11.7124	12.7094	12.3402	14.2332	14.1638	13.4998	13.5016	5643.21	3355.7	6697.47	5185.26	19258.4	18353.9	11583.6	11598.1	5414.23	14976	2.76604	+	PD_HC	biological regulation;biosynthetic process;cellular biosynthetic process;cellular macromolecule biosynthetic process;cellular macromolecule metabolic process;cellular metabolic process;cellular nitrogen compound metabolic process;cellular process;macromolecule biosynthetic process;macromolecule metabolic process;metabolic process;nitrogen compound metabolic process;nucleic acid metabolic process;…	binding;cation binding;DNA binding;ion binding;metal ion binding;nucleic acid binding	cell part;intracellular membrane-bounded organelle;intracellular organelle;intracellular organelle part;intracellular part;membrane-bounded organelle;nuclear part;nucleoplasm;nucleus;organelle;organelle part				11	11	11	11	11	11	11	11	2.72439	0.00113043	1.54351	3.13097	Q96ME7	Q96ME7	Q96ME7	ZN512_HUMAN	>sp|Q96ME7|ZN512_HUMAN Zinc finger protein 512 OS=Homo sapiens OX=9606 GN=ZNF512 PE=1 SV=2
CRIP1	Cysteine-rich protein 1	2.75737	1.46329	+	12.0421	11.2981	11.0339	11.1861	12.7961	12.6231	12.7853	12.5759	4217.29	2518.07	2096.69	2329.98	7112.3	6308.58	7059.25	6105.53	2424.02	6683.92	2.75737	+	PD_HC	anatomical structure development;anatomical structure morphogenesis;biological regulation;cell proliferation;cellular process;cellular response to abiotic stimulus;cellular response to antibiotic;cellular response to chemical stimulus;cellular response to light stimulus;cellular response to radiation;cellular response to stimulus;cellular response to stress;cellular response to UV;cellular respon…	AT DNA binding;binding;cation binding;DNA bending activity;DNA binding;ion binding;metal ion binding;nucleic acid binding;peptide binding;sequence-specific DNA binding;transition metal ion binding;zinc ion binding	cell part;cytoplasm;intracellular part				2	2	2	2	2	2	2	2	2.8807	0.00125448	1.30509	3.0288	P50238	P50238	P50238	CRIP1_HUMAN	>sp|P50238|CRIP1_HUMAN Cysteine-rich protein 1 OS=Homo sapiens OX=9606 GN=CRIP1 PE=1 SV=3
IGFBP7	Insulin-like growth factor-binding protein 7	2.72241	1.44489	+	14.1343	13.1008	12.7638	12.9473	14.4948	14.4796	14.3438	14.4623	17982.4	8784.84	6954.83	7898.16	23087.1	22845.1	20792.9	22572.8	8341.5	22709	2.72241	+	PD_HC	anatomical structure development;biological adhesion;biological regulation;cell adhesion;cellular process;cellular response to chemical stimulus;cellular response to endogenous stimulus;cellular response to hormone stimulus;cellular response to organic substance;cellular response to stimulus;developmental process;embryo implantation;inner ear development;negative regulation of biological process;…		extracellular membrane-bounded organelle;extracellular organelle;extracellular region;extracellular region part;extracellular space;extracellular vesicular exosome;membrane-bounded organelle;membrane-bounded vesicle;organelle;vesicle			REACT_169168	8	8	8	8	8	8	8	8	2.10341	0.00271064	1.20857	2.3744	Q16270	Q16270	Q16270	IBP7_HUMAN	>sp|Q16270|IBP7_HUMAN Insulin-like growth factor-binding protein 7 OS=Homo sapiens OX=9606 GN=IGFBP7 PE=1 SV=1
DKK2	Dickkopf-related protein 2	2.71588	1.44142	+	10.4959	9.51361	10.253	9.16824	11.6875	11.295	11.4443	11.1132	1444.05	730.94	1220.28	575.328	3298.28	2512.66	2786.62	2215.17	975.612	2649.64	2.71588	+	PD_HC	biological regulation;cell surface receptor linked signaling pathway;cellular process;cellular response to stimulus;developmental process;multicellular organismal development;multicellular organismal process;negative regulation of biological process;negative regulation of canonical Wnt receptor signaling pathway;negative regulation of cell communication;negative regulation of cellular process;neg…		extracellular region part;extracellular space	Wnt signaling pathway		REACT_264383;REACT_264594;REACT_264596	1	1	1	1	1	1	1	1	2.42381	0.0017024	1.52733	2.86314	Q9UBU2	Q9UBU2	Q9UBU2	DKK2_HUMAN	>sp|Q9UBU2|DKK2_HUMAN Dickkopf-related protein 2 OS=Homo sapiens OX=9606 GN=DKK2 PE=1 SV=1
NTRK2	BDNF/NT-3 growth factors receptor	2.71009	1.43834	+	12.6276	12.5754	12.6894	12.6826	14.106	14.0813	14.2579	13.8873	6328.29	6103.41	6605.26	6574.2	17633.1	17333.8	19591	15152.8	6451.25	17483.5	2.71009	+	PD_HC	activation of adenylate cyclase activity;aging;anatomical structure development;behavior;biological regulation;brain-derived neurotrophic factor receptor signaling pathway;calcium-mediated signaling;calcium-mediated signaling using intracellular calcium source;cell development;cell differentiation;cell migration;cell motility;cell surface receptor linked signaling pathway;cellular component movem…	adenyl nucleotide binding;adenyl ribonucleotide binding;ATP binding;binding;brain-derived neurotrophic factor binding;brain-derived neurotrophic factor-activated receptor activity;catalytic activity;growth factor binding;identical protein binding;kinase activity;molecular transducer activity;neurotrophin binding;neurotrophin receptor activity;nucleotide binding;phosphotransferase activity, alcoho…	axon part;cell part;cell projection;cell projection part;cell surface;cytoplasmic part;cytosol;dendritic spine;endoplasmic reticulum;endosomal part;endosome membrane;excitatory synapse;growth cone;integral to membrane;integral to plasma membrane;intracellular membrane-bounded organelle;intracellular organelle;intracellular organelle part;intracellular part;intrinsic to membrane;intrinsic to plasm…	MAPK signaling pathway;Neurotrophin signaling pathway		REACT_11046	4	4	4	4	4	4	4	4	5.70347	0.000566667	1.43936	5.12987	Q16620	Q16620	Q16620	NTRK2_HUMAN	>sp|Q16620|NTRK2_HUMAN BDNF/NT-3 growth factors receptor OS=Homo sapiens OX=9606 GN=NTRK2 PE=1 SV=1
OSBPL5	Oxysterol-binding protein-related protein 5	2.7092	1.43787	+	9.61298	9.91714	10.1713	9.25261	11.1628	11.7902	11.2575	10.8677	783.061	966.844	1153.1	609.977	2292.65	3541.64	2448.19	1868.55	874.952	2370.42	2.7092	+	PD_HC	alcohol metabolic process;cellular process;cholesterol metabolic process;cholesterol transport;establishment of localization;establishment of localization in cell;Golgi to plasma membrane transport;Golgi vesicle transport;intracellular transport;lipid metabolic process;lipid transport;metabolic process;organic substance transport;post-Golgi vesicle-mediated transport;primary metabolic process;sma…	binding;cholesterol binding;lipid binding;oxysterol binding;steroid binding;sterol binding	cell part;cytoplasmic part;cytosol;endoplasmic reticulum membrane;endoplasmic reticulum part;integral to membrane;intracellular organelle part;intracellular part;intrinsic to membrane;membrane;membrane part;organelle membrane;organelle part				3	3	3	3	3	3	3	3	2.83746	0.00100415	1.53107	3.21546	Q9H0X9	Q9H0X9	Q9H0X9	OSBL5_HUMAN	>sp|Q9H0X9|OSBL5_HUMAN Oxysterol-binding protein-related protein 5 OS=Homo sapiens OX=9606 GN=OSBPL5 PE=1 SV=1
IFT122	Intraflagellar transport protein 122 homolog	2.70489	1.43557	+	11.993	12.1376	12.2549	12.1732	13.6262	13.6215	13.56	13.48	4076.17	4505.9	4887.56	4618.47	12644.3	12603.2	12077.2	11425.7	4562.19	12340.2	2.70489	+	PD_HC	anatomical structure development;anatomical structure formation involved in morphogenesis;anatomical structure morphogenesis;appendage development;appendage morphogenesis;biological regulation;body morphogenesis;camera-type eye morphogenesis;cell part morphogenesis;cell projection assembly;cell projection morphogenesis;cell projection organization;cell surface receptor linked signaling pathway;ce…		axoneme part;cell part;cell projection;cell projection part;cilium;cytoplasm;intracellular part;intraflagellar transport particle A;macromolecular complex;membrane;nonmotile primary cilium;organelle part;photoreceptor connecting cilium;primary cilium;protein complex			REACT_268024;REACT_268323	10	10	10	10	10	10	10	10	6.26294	0.000666667	1.43225	5.41478	Q9HBG6	Q9HBG6	Q9HBG6	IF122_HUMAN	>sp|Q9HBG6|IF122_HUMAN Intraflagellar transport protein 122 homolog OS=Homo sapiens OX=9606 GN=IFT122 PE=1 SV=2
EFEMP1	EGF-containing fibulin-like extracellular matrix protein 1	2.69077	1.42802	+	12.0083	11.8908	12.4538	11.5141	13.4867	13.2433	13.6053	13.2621	4119.63	3797.41	5610.06	2924.75	11478.9	9696.85	12462.4	9824.04	3958.52	10651.5	2.69077	+	PD_HC	biological regulation;cell surface receptor linked signaling pathway;cellular component organization;cellular component organization at cellular level;cellular component organization or biogenesis;cellular component organization or biogenesis at cellular level;cellular macromolecule metabolic process;cellular metabolic process;cellular process;cellular protein metabolic process;cellular response …	binding;calcium ion binding;catalytic activity;cation binding;epidermal growth factor receptor binding;epidermal growth factor-activated receptor activity;growth factor receptor binding;ion binding;kinase activity;metal ion binding;molecular transducer activity;phosphotransferase activity, alcohol group as acceptor;protein binding;protein kinase activity;protein tyrosine kinase activity;receptor …	extracellular matrix;extracellular membrane-bounded organelle;extracellular organelle;extracellular region;extracellular region part;extracellular space;extracellular vesicular exosome;membrane-bounded organelle;membrane-bounded vesicle;organelle;proteinaceous extracellular matrix;vesicle			REACT_150331	7	7	7	7	7	7	7	7	3.28297	0.00089	1.43264	3.47156	Q12805	Q12805	Q12805	FBLN3_HUMAN	>sp|Q12805|FBLN3_HUMAN EGF-containing fibulin-like extracellular matrix protein 1 OS=Homo sapiens OX=9606 GN=EFEMP1 PE=1 SV=2
KAZN	Kazrin	2.68547	1.42518	+	11.5613	12.0154	12.0781	12.0109	13.4125	13.4637	13.4953	13.2953	3022.03	4139.96	4323.85	4127.06	10903.5	11297.4	11547.6	10052.7	4133.51	11100.4	2.68547	+	PD_HC	developmental process;keratinization		anchoring junction;cell junction;cell part;cell-cell junction;cornified envelope;cytoplasm;cytoskeleton;desmosome;intracellular membrane-bounded organelle;intracellular non-membrane-bounded organelle;intracellular organelle;intracellular part;membrane-bounded organelle;non-membrane-bounded organelle;nucleus;organelle				9	9	9	9	9	9	9	9	4.64959	0.000373626	1.50029	4.58567	Q674X7	Q674X7	Q674X7	KAZRN_HUMAN	>sp|Q674X7|KAZRN_HUMAN Kazrin OS=Homo sapiens OX=9606 GN=KAZN PE=1 SV=2
MPDZ	Multiple PDZ domain protein	2.67968	1.42206	+	11.7867	11.2713	10.8437	11.3558	13.0689	12.7747	12.6859	12.6967	3533.05	2471.72	1837.72	2620.82	8592.72	7007.58	6589.26	6638.77	2546.27	6823.17	2.67968	+	PD_HC	axon ensheathment;biological adhesion;cell adhesion;cellular process;ensheathment of neurons;myelination;viral reproduction	binding;protein binding;protein C-terminus binding	apical plasma membrane;apicolateral plasma membrane;cell junction;cell part;cell projection;cell-cell junction;cytoplasm;cytoplasmic part;cytoplasmic vesicle;cytoskeletal part;dendrite;intracellular organelle;intracellular organelle part;intracellular part;membrane;membrane part;neuron projection;occluding junction;organelle;organelle part;plasma membrane part;postsynaptic density;postsynaptic me…	Tight junction	RICH1/AMOT polarity complex, Flag-Amot precipitated		5	5	5	5	5	5	5	5	3.37452	0.000802228	1.49217	3.61261	O75970	O75970	O75970	MPDZ_HUMAN	>sp|O75970|MPDZ_HUMAN Multiple PDZ domain protein OS=Homo sapiens OX=9606 GN=MPDZ PE=1 SV=2
YEATS4	YEATS domain-containing protein 4	2.67572	1.41993	+	11.944	11.1943	0.57264	8.16669	11.7863	11.4569	11.7759	12.2014	3940.05	2343.26	1.48724	287.355	3532.07	2811.06	3506.7	4709.64	1315.31	3519.39	2.67572	+	PD_HC	biological regulation;biosynthetic process;cell cycle phase;cell cycle process;cellular biosynthetic process;cellular component organization;cellular component organization at cellular level;cellular component organization or biogenesis;cellular component organization or biogenesis at cellular level;cellular macromolecule biosynthetic process;cellular macromolecule metabolic process;cellular meta…	binding;DNA binding;nucleic acid binding;nucleic acid binding transcription factor activity;protein binding;protein C-terminus binding;sequence-specific DNA binding transcription factor activity;structural constituent of cytoskeleton;structural molecule activity	cell part;cytoplasm;H4/H2A histone acetyltransferase complex;histone acetyltransferase complex;intracellular non-membrane-bounded organelle;intracellular organelle;intracellular organelle part;intracellular part;macromolecular complex;non-membrane-bounded organelle;NuA4 histone acetyltransferase complex;nuclear matrix;nuclear part;nucleolus;nucleoplasm;nucleoplasm part;organelle;organelle part;pr…		NuA4/Tip60 HAT complex;NuA4/Tip60-HAT complex A;SRCAP-associated chromatin remodeling complex	REACT_264245	1	1	1	1	1	1	1	1	0.719318	0.0289116	3.83569	1.36904	O95619	O95619	O95619	YETS4_HUMAN	>sp|O95619|YETS4_HUMAN YEATS domain-containing protein 4 OS=Homo sapiens OX=9606 GN=YEATS4 PE=1 SV=1
IGF1R	Insulin-like growth factor 1 receptor	2.67319	1.41856	+	13.5803	12.9456	12.8281	12.4236	14.4416	14.3022	14.1658	14.311	12248.4	7888.85	7271.82	5493.84	22251.3	20201.9	18379.4	20325.5	7580.33	20263.7	2.67319	+	PD_HC	anatomical structure development;anatomical structure morphogenesis;axonogenesis;biological regulation;brain development;cell part morphogenesis;cell projection morphogenesis;cell projection organization;cell surface receptor linked signaling pathway;cellular component assembly;cellular component morphogenesis;cellular component organization;cellular component organization at cellular level;cellu…	adenyl nucleotide binding;adenyl ribonucleotide binding;ATP binding;binding;catalytic activity;enzyme binding;growth factor binding;hormone binding;identical protein binding;insulin binding;insulin receptor binding;insulin receptor substrate binding;insulin-like growth factor binding;insulin-like growth factor I binding;insulin-like growth factor-activated receptor activity;kinase activity;kinase…	caveola;cell part;cell projection;integral to membrane;integral to plasma membrane;intracellular membrane-bounded organelle;intracellular organelle;intracellular part;intrinsic to membrane;intrinsic to plasma membrane;macromolecular complex;membrane;membrane part;membrane raft;membrane-bounded organelle;neuron projection;organelle;plasma membrane;plasma membrane part;protein complex;receptor comp…	Adherens junction;Endocytosis;Focal adhesion;Glioma;Long-term depression;Melanoma;Oocyte meiosis;Pathways in cancer;Progesterone-mediated oocyte maturation;Prostate cancer		REACT_150139;REACT_150203;REACT_150359	19	19	19	19	19	19	19	19	2.83079	0.00104189	1.36076	3.04983	P08069	P08069	P08069	IGF1R_HUMAN	>sp|P08069|IGF1R_HUMAN Insulin-like growth factor 1 receptor OS=Homo sapiens OX=9606 GN=IGF1R PE=1 SV=1
SLC7A8	Large neutral amino acids transporter small subunit 2	2.67256	1.41822	+	12.0814	11.1514	11.9271	11.694	13.3675	13.1887	13.135	13.2769	4333.75	2274.6	3894.17	3313.18	10568.6	9336.72	8995.58	9925.33	3603.67	9631.03	2.67256	+	PD_HC	amine metabolic process;amine transport;amino acid transmembrane transport;amino acid transport;biological regulation;blood coagulation;carboxylic acid metabolic process;carboxylic acid transport;cation homeostasis;cation transport;cell migration;cell motility;cellular amine metabolic process;cellular amino acid metabolic process;cellular component movement;cellular ketone metabolic process;cellu…	active transmembrane transporter activity;amine transmembrane transporter activity;amino acid transmembrane transporter activity;antigen binding;antiporter activity;binding;carboxylic acid transmembrane transporter activity;cation transmembrane transporter activity;ion transmembrane transporter activity;L-amino acid transmembrane transporter activity;neutral amino acid transmembrane transporter a…	basolateral plasma membrane;cell part;cytoplasm;extracellular membrane-bounded organelle;extracellular organelle;extracellular region part;extracellular vesicular exosome;integral to membrane;integral to plasma membrane;intracellular part;intrinsic to membrane;intrinsic to plasma membrane;membrane;membrane part;membrane-bounded organelle;membrane-bounded vesicle;organelle;plasma membrane;plasma m…	Protein digestion and absorption	CD98-LAT2-ITGB1 complex;LAT2-ITGB1 complex	REACT_12560;REACT_13796	5	5	5	5	5	5	5	5	3.46684	0.000690909	1.52856	3.72925	Q9UHI5	Q9UHI5	Q9UHI5	LAT2_HUMAN	>sp|Q9UHI5|LAT2_HUMAN Large neutral amino acids transporter small subunit 2 OS=Homo sapiens OX=9606 GN=SLC7A8 PE=1 SV=1
TGFB2	Transforming growth factor beta-2 proprotein	2.66062	1.41176	+	11.8003	11.6309	11.6767	11.5485	13.1031	12.7662	13.0274	13.1404	3566.52	3171.39	3273.69	2995.33	8798.85	6966.41	8349.07	9029.31	3222.54	8573.96	2.66062	+	PD_HC	activation of protein kinase activity;alcohol biosynthetic process;alcohol metabolic process;amine biosynthetic process;amine metabolic process;anatomical structure development;anatomical structure formation involved in morphogenesis;anatomical structure morphogenesis;angiogenesis;axon guidance;benzene-containing compound metabolic process;biological adhesion;biological regulation;biosynthetic pr…	beta-amyloid binding;binding;catalytic activity;cytokine activity;cytokine receptor binding;identical protein binding;kinase activity;molecular transducer activity;phosphotransferase activity, alcohol group as acceptor;protein binding;protein dimerization activity;protein heterodimerization activity;protein homodimerization activity;protein kinase activity;protein serine/threonine kinase activity…	axon;cell body;cell part;cell projection;cytoplasmic membrane-bounded vesicle lumen;cytoplasmic part;cytoplasmic vesicle part;endosome;extracellular matrix;extracellular region;extracellular region part;extracellular space;intracellular membrane-bounded organelle;intracellular organelle;intracellular organelle part;intracellular part;membrane-bounded organelle;membrane-enclosed lumen;neuron proje…	Amoebiasis;Cell cycle;Chagas disease (American trypanosomiasis);Chronic myeloid leukemia;Colorectal cancer;Cytokine-cytokine receptor interaction;Dilated cardiomyopathy;Endocytosis;Hypertrophic cardiomyopathy (HCM);ko05152;Leishmaniasis;Malaria;MAPK signaling pathway;Osteoclast differentiation;Pancreatic cancer;Pathways in cancer;Renal cell carcinoma;Rheumatoid arthritis;TGF-beta signaling pathwa…		REACT_150331;REACT_163906;REACT_318	5	5	5	5	5	5	5	5	4.99523	0.000359788	1.34515	4.49251	P61812	P61812	P61812	TGFB2_HUMAN	>sp|P61812|TGFB2_HUMAN Transforming growth factor beta-2 proprotein OS=Homo sapiens OX=9606 GN=TGFB2 PE=1 SV=1
TSEN15	tRNA-splicing endonuclease subunit Sen15	2.65361	1.40795	+	11.2456	9.89819	10.4673	10.0308	11.6737	11.4759	12.0851	11.6732	2428.08	954.228	1415.7	1046.1	3266.89	2848.33	4344.88	3265.75	1230.9	3266.32	2.65361	+	PD_HC	cellular macromolecule metabolic process;cellular metabolic process;cellular nitrogen compound metabolic process;cellular process;macromolecule metabolic process;metabolic process;mRNA metabolic process;mRNA processing;ncRNA metabolic process;ncRNA processing;nitrogen compound metabolic process;nucleic acid metabolic process;nucleobase-containing compound metabolic process;primary metabolic proce…	catalytic activity;endonuclease activity;endonuclease activity, active with either ribo- or deoxyribonucleic acids and producing 3'-phosphomonoesters;endoribonuclease activity;endoribonuclease activity, producing 3'-phosphomonoesters;hydrolase activity;hydrolase activity, acting on ester bonds;nuclease activity;ribonuclease activity;tRNA-intron endonuclease activity;tRNA-specific ribonuclease act…	cell part;intracellular non-membrane-bounded organelle;intracellular organelle;intracellular organelle part;intracellular part;non-membrane-bounded organelle;nuclear part;nucleolus;organelle;organelle part		tRNA splicing endonuclease		1	1	1	1	1	1	1	1	2.14419	0.0026385	1.31645	2.48538	Q8WW01	Q8WW01	Q8WW01	SEN15_HUMAN	>sp|Q8WW01|SEN15_HUMAN tRNA-splicing endonuclease subunit Sen15 OS=Homo sapiens OX=9606 GN=TSEN15 PE=1 SV=1
RRM2B	Ribonucleoside-diphosphate reductase subunit M2 B	2.64235	1.40182	+	12.4347	11.8118	12.0822	11.8336	13.3426	13.3872	13.4604	13.3304	5536.28	3595.06	4336.15	3649.8	10387.8	10713.9	11271.6	10300.3	3992.97	10550.9	2.64235	+	PD_HC	anatomical structure development;biosynthetic process;cellular biosynthetic process;cellular macromolecule biosynthetic process;cellular macromolecule metabolic process;cellular metabolic process;cellular nitrogen compound biosynthetic process;cellular nitrogen compound metabolic process;cellular process;cellular response to stimulus;cellular response to stress;deoxyribonucleoside diphosphate met…	binding;catalytic activity;cation binding;ion binding;metal ion binding;oxidoreductase activity;oxidoreductase activity, acting on CH or CH2 groups;oxidoreductase activity, acting on CH or CH2 groups, disulfide as acceptor;ribonucleoside-diphosphate reductase activity	cell part;cytoplasm;extracellular membrane-bounded organelle;extracellular organelle;extracellular region part;extracellular vesicular exosome;intracellular organelle part;intracellular part;membrane-bounded organelle;membrane-bounded vesicle;nuclear part;nucleoplasm;organelle;organelle part;vesicle	Glutathione metabolism;p53 signaling pathway;Purine metabolism;Pyrimidine metabolism		REACT_21330;REACT_355377	6	6	6	6	6	6	6	6	3.99263	0.00076	1.33959	3.85009	Q7LG56	Q7LG56	Q7LG56	RIR2B_HUMAN	>sp|Q7LG56|RIR2B_HUMAN Ribonucleoside-diphosphate reductase subunit M2 B OS=Homo sapiens OX=9606 GN=RRM2B PE=1 SV=1
FCSK	L-fucose kinase	2.63968	1.40037	+	11.5418	11.0884	11.1515	11.3025	12.8178	12.4906	12.7559	12.3499	2981.45	2177.41	2274.76	2525.76	7220.08	5755	6916.85	5220.24	2400.26	6335.93	2.63968	+	PD_HC		adenyl nucleotide binding;adenyl ribonucleotide binding;ATP binding;binding;catalytic activity;fucokinase activity;kinase activity;nucleotide binding;phosphotransferase activity, alcohol group as acceptor;purine nucleotide binding;purine ribonucleoside triphosphate binding;purine ribonucleotide binding;ribonucleotide binding;transferase activity;transferase activity, transferring phosphorus-conta…	cell part;cytoplasm;intracellular part	Amino sugar and nucleotide sugar metabolism;Fructose and mannose metabolism			9	9	9	9	9	9	9	9	3.95411	0.000733119	1.3325	3.8127	Q8N0W3	Q8N0W3	Q8N0W3	FCSK_HUMAN	>sp|Q8N0W3|FCSK_HUMAN L-fucose kinase OS=Homo sapiens OX=9606 GN=FCSK PE=1 SV=2
DNAAF5	Dynein axonemal assembly factor 5	2.62684	1.39333	+	11.6191	10.2022	10.8035	10.9989	12.3285	12.2567	12.348	12.2665	3145.56	1178.06	1787.22	2046.44	5143.38	4893.67	5213.37	4927.02	1916.83	5035.2	2.62684	+	PD_HC	cell projection organization;cellular component movement;cellular component organization;cellular component organization at cellular level;cellular component organization or biogenesis;cellular component organization or biogenesis at cellular level;cellular process;cilium movement;microtubule-based movement;microtubule-based process	binding;dynein binding;dynein intermediate chain binding;protein binding	cell part;cytoplasm;intracellular part				6	6	6	6	6	6	6	6	2.50507	0.00173832	1.39402	2.82851	Q86Y56	Q86Y56	Q86Y56	DAAF5_HUMAN	>sp|Q86Y56|DAAF5_HUMAN Dynein axonemal assembly factor 5 OS=Homo sapiens OX=9606 GN=DNAAF5 PE=1 SV=4
GPC4	Glypican-4	2.62455	1.39207	+	13.6687	13.6065	13.6287	13.5042	15.1868	14.9268	14.9335	15.0821	13022.3	12472.8	12666.2	11619	37297.7	31146.9	31291.9	34686.8	12569.5	32989.3	2.62455	+	PD_HC	amine metabolic process;aminoglycan biosynthetic process;aminoglycan catabolic process;aminoglycan metabolic process;anatomical structure morphogenesis;biological regulation;biosynthetic process;carbohydrate biosynthetic process;carbohydrate catabolic process;carbohydrate metabolic process;catabolic process;cell proliferation;cellular lipid metabolic process;cellular metabolic process;cellular pr…		anchored to membrane;cell part;cytoplasmic part;external side of plasma membrane;extracellular matrix;extracellular membrane-bounded organelle;extracellular organelle;extracellular region part;extracellular space;extracellular vesicular exosome;Golgi apparatus part;Golgi lumen;integral to membrane;integral to plasma membrane;intracellular membrane-bounded organelle;intracellular organelle;intrace…			REACT_120752;REACT_121248;REACT_121408;REACT_24968;REACT_267741;REACT_267942;REACT_268678;REACT_268749	12	12	12	12	12	12	12	12	5.98105	0.00060177	1.43027	5.26086	O75487	O75487	O75487	GPC4_HUMAN	>sp|O75487|GPC4_HUMAN Glypican-4 OS=Homo sapiens OX=9606 GN=GPC4 PE=1 SV=4
ITPR2	Inositol 1,4,5-trisphosphate receptor type 2	2.61478	1.38669	+	11.1021	9.91401	9.45399	9.69726	11.2419	10.7373	11.5229	11.1494	2198.19	964.749	701.35	830.168	2421.86	1707.06	2942.65	2271.45	897.459	2346.66	2.61478	+	PD_HC	activation of immune response;activation of innate immune response;activation of phospholipase C activity;biological regulation;blood coagulation;cell activation;cell surface receptor linked signaling pathway;cellular metabolic process;cellular process;cellular response to cAMP;cellular response to chemical stimulus;cellular response to ethanol;cellular response to fibroblast growth factor stimul…	binding;calcium channel activity;calcium ion transmembrane transporter activity;calcium-release channel activity;cation channel activity;cation transmembrane transporter activity;channel activity;divalent inorganic cation transmembrane transporter activity;gated channel activity;inorganic cation transmembrane transporter activity;inositol 1,4,5-trisphosphate-sensitive calcium-release channel acti…	cell cortex;cell part;cytoplasmic part;endoplasmic reticulum membrane;endoplasmic reticulum part;integral to membrane;intracellular organelle part;intracellular part;intrinsic to membrane;macromolecular complex;membrane;membrane part;organelle membrane;organelle part;plasma membrane;platelet dense tubular network membrane;protein complex;receptor complex;sarcoplasmic reticulum membrane	Alzheimer's disease;Calcium signaling pathway;Gap junction;Gastric acid secretion;GnRH signaling pathway;Long-term depression;Long-term potentiation;Oocyte meiosis;Pancreatic secretion;Phosphatidylinositol signaling system;Salivary secretion;Vascular smooth muscle contraction		REACT_111064;REACT_118700;REACT_15426;REACT_160158;REACT_162;REACT_163834;REACT_18274;REACT_18325;REACT_188329;REACT_2202;REACT_263982;REACT_264273	1	1	1	1	1	1	1	1	1.50695	0.00889077	1.12101	1.8677	Q14571	Q14571	Q14571	ITPR2_HUMAN	>sp|Q14571|ITPR2_HUMAN Inositol 1,4,5-trisphosphate receptor type 2 OS=Homo sapiens OX=9606 GN=ITPR2 PE=1 SV=2
EML6	Echinoderm microtubule-associated protein-like 6	2.60671	1.38223	+	11.2143	8.93429	9.70298	10.8796	12.0337	11.8464	11.7319	11.108	2375.97	489.203	833.466	1884.02	4192.8	3682.32	3401.37	2207.2	1358.74	3541.85	2.60671	+	PD_HC			cell part;cytoplasm;cytoskeletal part;intracellular organelle part;intracellular part;macromolecular complex;microtubule;organelle part;protein complex				1	1	1	1	1	1	1	1	1.42171	0.00709406	1.49718	1.95888	Q6ZMW3	Q6ZMW3	Q6ZMW3	EMAL6_HUMAN	>sp|Q6ZMW3|EMAL6_HUMAN Echinoderm microtubule-associated protein-like 6 OS=Homo sapiens OX=9606 GN=EML6 PE=2 SV=2
HPD	4-hydroxyphenylpyruvate dioxygenase	2.59455	1.37549	+	14.0443	13.2076	13.3695	13.0167	14.4549	14.7275	14.9776	14.6024	16894.9	9459.84	10583.3	8287.38	22457.3	27128.1	32263.2	24874.8	10021.6	26001.5	2.59455	+	PD_HC	amine catabolic process;amine metabolic process;aromatic amino acid family catabolic process;aromatic amino acid family metabolic process;aromatic compound catabolic process;carboxylic acid catabolic process;carboxylic acid metabolic process;catabolic process;cellular amine metabolic process;cellular amino acid catabolic process;cellular amino acid metabolic process;cellular aromatic compound met…	4-hydroxyphenylpyruvate dioxygenase activity;binding;catalytic activity;cation binding;dioxygenase activity;ion binding;metal ion binding;oxidoreductase activity;oxidoreductase activity, acting on single donors with incorporation of molecular oxygen;oxidoreductase activity, acting on single donors with incorporation of molecular oxygen, incorporation of two atoms of oxygen	cell part;cytoplasmic part;cytosol;extracellular membrane-bounded organelle;extracellular organelle;extracellular region part;extracellular vesicular exosome;intracellular part;membrane-bounded organelle;membrane-bounded vesicle;organelle;vesicle	Phenylalanine metabolism;Tyrosine metabolism;Ubiquinone and other terpenoid-quinone biosynthesis		REACT_1786	8	8	8	8	8	8	8	8	2.66868	0.00169427	1.28109	2.85044	P32754	P32754	P32754	HPPD_HUMAN	>sp|P32754|HPPD_HUMAN 4-hydroxyphenylpyruvate dioxygenase OS=Homo sapiens OX=9606 GN=HPD PE=1 SV=2
OGFRL1	Opioid growth factor receptor-like protein 1	2.56773	1.36049	+	10.0338	11.5877	11.1685	11.7205	12.7399	12.7388	12.7675	12.8586	1048.27	3077.83	2301.73	3374.6	6840.57	6835.35	6972.69	7427.19	2689.78	6906.63	2.56773	+	PD_HC		receptor activity	cell part;membrane				5	5	5	5	5	5	5	5	2.28897	0.00173561	1.64859	2.82216	Q5TC84	Q5TC84	Q5TC84	OGRL1_HUMAN	>sp|Q5TC84|OGRL1_HUMAN Opioid growth factor receptor-like protein 1 OS=Homo sapiens OX=9606 GN=OGFRL1 PE=2 SV=1
CMIP	C-Maf-inducing protein	2.56093	1.35667	+	14.0838	14.1309	13.9885	14.172	15.5022	15.3789	15.4983	15.4293	17363.9	17940.1	16253.9	18458.5	46411.7	42609.9	46286.4	44124.7	17652	45205.6	2.56093	+	PD_HC			cell part;cytoplasm;intracellular membrane-bounded organelle;intracellular organelle;intracellular part;membrane-bounded organelle;nucleus;organelle				14	14	14	14	14	14	14	14	6.819	0.00068	1.3584	5.44814	Q8IY22	Q8IY22	Q8IY22	CMIP_HUMAN	>sp|Q8IY22|CMIP_HUMAN C-Maf-inducing protein OS=Homo sapiens OX=9606 GN=CMIP PE=1 SV=3
FLNA	Filamin-A	2.55945	1.35584	+	18.4765	18.4888	18.4139	18.4744	19.8572	19.6743	19.8049	19.9107	364738	367861	349250	364207	949758	836670	915944	985639	364472	932851	2.55945	+	PD_HC	actin crosslink formation;actin cytoskeleton organization;actin cytoskeleton reorganization;actin filament organization;actin filament-based process;anatomical structure formation involved in morphogenesis;anatomical structure morphogenesis;biological adhesion;biological regulation;biosynthetic process;blood coagulation;cAMP-mediated signaling;cell activation;cell adhesion;cell cycle process;cell…	actin binding;actin filament binding;binding;cytoskeletal protein binding;enzyme binding;Fc-gamma receptor I complex binding;glycoprotein binding;GTPase binding;identical protein binding;immunoglobulin receptor binding;molecular transducer activity;protein binding;protein dimerization activity;protein homodimerization activity;Rac GTPase binding;Ral GTPase binding;Ras GTPase binding;receptor bind…	actin cytoskeleton;actin filament;adherens junction;anchoring junction;cell body;cell cortex part;cell junction;cell part;cell projection part;cell-substrate adherens junction;cell-substrate junction;chromosomal part;cortical cytoskeleton;cytoplasm;cytoplasmic part;cytoskeletal part;cytoskeleton;cytosol;dendritic shaft;extracellular membrane-bounded organelle;extracellular organelle;extracellular…	Focal adhesion;MAPK signaling pathway		REACT_20649;REACT_23847;REACT_318;REACT_355347	127	127	127	127	127	127	127	127	6.59564	0.00062963	1.34841	5.32153	P21333	P21333	P21333	FLNA_HUMAN	>sp|P21333|FLNA_HUMAN Filamin-A OS=Homo sapiens OX=9606 GN=FLNA PE=1 SV=4
VIM	Vimentin	2.5407	1.34523	+	21.2004	21.9222	21.9247	21.9595	23.3335	23.161	23.2019	23.3325	2.40966e+06	3.97411e+06	3.981e+06	4.0782e+06	1.05702e+07	9.37898e+06	9.64868e+06	1.05629e+07	3.97756e+06	1.01058e+07	2.5407	+	PD_HC	actin filament-based movement;actin filament-based process;actin-mediated cell contraction;actin-myosin filament sliding;anatomical structure development;apoptosis;astrocyte development;astrocyte differentiation;Bergmann glial cell differentiation;biological regulation;cell death;cell development;cell differentiation;cellular component disassembly;cellular component disassembly at cellular level;…	binding;double-stranded RNA binding;glycoprotein binding;identical protein binding;nucleic acid binding;protein binding;protein C-terminus binding;RNA binding;scaffold protein binding;structural constituent of cytoskeleton;structural constituent of eye lens;structural molecule activity	adherens junction;anchoring junction;cell junction;cell leading edge;cell part;cell projection;cell-substrate adherens junction;cell-substrate junction;cytoplasm;cytoplasmic part;cytoskeletal part;cytoskeleton;cytosol;extracellular membrane-bounded organelle;extracellular organelle;extracellular region part;extracellular vesicular exosome;focal adhesion;intermediate filament;intermediate filament…			REACT_13541;REACT_16969	52	52	52	52	52	52	52	52	3.67765	0.000772881	1.50552	3.86749	P08670	P08670	P08670	VIME_HUMAN	>sp|P08670|VIME_HUMAN Vimentin OS=Homo sapiens OX=9606 GN=VIM PE=1 SV=4
FAS	Tumor necrosis factor receptor superfamily member 6	2.53882	1.34416	+	12.8916	13.2148	13.2699	12.8247	14.4548	14.2791	14.4453	14.3664	7599.03	9507.17	9877.29	7254.7	22455.8	19881	22308.4	21121.1	8553.1	21714.8	2.53882	+	PD_HC	activation of caspase activity;activation-induced cell death of T cells;adaptive immune response;adaptive immune response based on somatic recombination of immune receptors built from immunoglobulin superfamily domains;anatomical structure development;apoptosis;B cell mediated immunity;biological regulation;cell death;cell surface receptor linked signaling pathway;cellular component assembly;cell…	binding;enzyme binding;identical protein binding;kinase binding;molecular transducer activity;protein binding;receptor activity;signal transducer activity;signaling receptor activity;transmembrane signaling receptor activity	CD95 death-inducing signaling complex;cell part;cell surface;cytoplasm;cytoplasmic part;cytosol;death-inducing signaling complex;external side of plasma membrane;extracellular membrane-bounded organelle;extracellular organelle;extracellular region part;extracellular vesicular exosome;integral to membrane;intracellular membrane-bounded organelle;intracellular organelle;intracellular part;intrinsic…	African trypanosomiasis;Allograft rejection;Alzheimer's disease;Apoptosis;Autoimmune thyroid disease;Chagas disease (American trypanosomiasis);Cytokine-cytokine receptor interaction;Graft-versus-host disease;MAPK signaling pathway;Measles;Natural killer cell mediated cytotoxicity;p53 signaling pathway;Pathways in cancer;Type I diabetes mellitus	Death induced signaling complex DISC (FAS, FADD, CASP8, CFLAR), membrane-associated, CD95L induced;Death-inducing signaling complex DISC (type I cells associated), stimulated;FAS-FADD-CASP10 complex;FAS-FADD-CASP8 complex;FAS-FADD-CASP8-CASP10 complex	REACT_900	6	6	6	6	6	6	6	6	4.51464	0.000290598	1.33615	4.18173	P25445	P25445	P25445	TNR6_HUMAN	>sp|P25445|TNR6_HUMAN Tumor necrosis factor receptor superfamily member 6 OS=Homo sapiens OX=9606 GN=FAS PE=1 SV=1
RAB31	Ras-related protein Rab-31	2.52863	1.33836	+	13.3281	12.8864	12.8425	12.9496	14.4291	14.259	14.2544	14.2071	10283.9	7571.69	7344.76	7910.76	22059.3	19605.9	19543.5	18913.1	7741.22	19574.7	2.52863	+	PD_HC	biological regulation;cellular component organization;cellular component organization at cellular level;cellular component organization or biogenesis;cellular component organization or biogenesis at cellular level;cellular macromolecule metabolic process;cellular membrane organization;cellular metabolic process;cellular process;cellular response to chemical stimulus;cellular response to endogenou…	binding;catalytic activity;GDP binding;GTP binding;GTPase activity;guanyl nucleotide binding;guanyl ribonucleotide binding;hydrolase activity;hydrolase activity, acting on acid anhydrides;hydrolase activity, acting on acid anhydrides, in phosphorus-containing anhydrides;nucleoside-triphosphatase activity;nucleotide binding;purine nucleotide binding;purine ribonucleoside triphosphate binding;purin…	cell part;cytoplasmic membrane-bounded vesicle;cytoplasmic part;cytoplasmic vesicle;cytoplasmic vesicle membrane;cytoplasmic vesicle part;early endosome;endocytic vesicle;endocytic vesicle membrane;endosome;Golgi apparatus part;Golgi membrane;intracellular membrane-bounded organelle;intracellular organelle;intracellular organelle part;intracellular part;late endosome;membrane;membrane-bounded org…	Endocytosis			8	8	8	8	8	8	8	8	4.3835	0.000653992	1.28574	4.00271	Q13636	Q13636	Q13636	RAB31_HUMAN	>sp|Q13636|RAB31_HUMAN Ras-related protein Rab-31 OS=Homo sapiens OX=9606 GN=RAB31 PE=1 SV=1
PPP1R14C	Protein phosphatase 1 regulatory subunit 14C	2.52542	1.33652	+	13.6168	13.7157	14.0037	14.1182	15.1794	15.2569	15.227	15.0475	12562.2	13453.6	16426.1	17782.9	37106.9	39154.8	38351.6	33864.8	14939.8	37729.3	2.52542	+	PD_HC	biological regulation;regulation of biological process;regulation of cellular metabolic process;regulation of cellular process;regulation of metabolic process;regulation of phosphate metabolic process;regulation of phosphorus metabolic process;regulation of phosphorylation	enzyme inhibitor activity;enzyme regulator activity;phosphatase inhibitor activity;phosphatase regulator activity;protein phosphatase inhibitor activity;protein phosphatase regulator activity;protein serine/threonine phosphatase inhibitor activity	cell part;cytoplasm;intracellular part;membrane				5	5	5	5	5	5	5	5	4.32637	0.000659004	1.31412	4.02154	Q8TAE6	Q8TAE6	Q8TAE6	PP14C_HUMAN	>sp|Q8TAE6|PP14C_HUMAN Protein phosphatase 1 regulatory subunit 14C OS=Homo sapiens OX=9606 GN=PPP1R14C PE=1 SV=3
ADGRG1	Adhesion G-protein coupled receptor G1	2.51997	1.33341	+	12.651	11.9318	12.5034	12.0599	13.5556	13.7403	13.6165	13.6474	6431.77	3906.88	5806.29	4269.64	12040.4	13684.9	12559.6	12831.5	5037.97	12695.5	2.51997	+	PD_HC	anatomical structure development;anatomical structure formation involved in morphogenesis;angiogenesis;biological adhesion;biological regulation;brain development;cell adhesion;cell communication;cell migration;cell motility;cell surface receptor linked signaling pathway;cell-cell signaling;cellular component movement;cellular process;cellular response to stimulus;cerebral cortex cell migration;c…	binding;collagen binding;extracellular matrix binding;G-protein coupled receptor activity;molecular transducer activity;protein binding;receptor activity;signal transducer activity;signaling receptor activity;transmembrane signaling receptor activity	cell part;extracellular membrane-bounded organelle;extracellular organelle;extracellular region part;extracellular vesicular exosome;integral to membrane;integral to plasma membrane;intrinsic to membrane;intrinsic to plasma membrane;membrane part;membrane-bounded organelle;membrane-bounded vesicle;organelle;plasma membrane part;vesicle		GPR56-CD81-Galphaq/11-Gbeta complex		7	7	7	7	7	7	7	7	3.58625	0.00096477	1.35342	3.5923	Q9Y653	Q9Y653	Q9Y653	AGRG1_HUMAN	>sp|Q9Y653|AGRG1_HUMAN Adhesion G-protein coupled receptor G1 OS=Homo sapiens OX=9606 GN=ADGRG1 PE=1 SV=2
VSTM2L	V-set and transmembrane domain-containing protein 2-like protein	2.51279	1.32929	+	11.9	11.5032	11.7552	11.4682	13.2433	13.047	12.8759	12.7216	3821.7	2902.74	3456.75	2833.17	9696.85	8463.27	7516.78	6754.34	3179.74	7990.03	2.51279	+	PD_HC							3	3	3	3	3	3	3	3	3.87374	0.000695122	1.31531	3.73136	Q96N03	Q96N03	Q96N03	VTM2L_HUMAN	>sp|Q96N03|VTM2L_HUMAN V-set and transmembrane domain-containing protein 2-like protein OS=Homo sapiens OX=9606 GN=VSTM2L PE=1 SV=1
ERCC1	DNA excision repair protein ERCC-1	2.51171	1.32867	+	6.24523	9.73523	9.06761	8.27309	10.4895	10.1868	9.49595	9.90559	75.858	852.307	536.565	309.349	1437.65	1165.55	722.048	959.135	422.957	1062.34	2.51171	+	PD_HC	aging;anatomical structure development;anatomical structure formation involved in morphogenesis;B cell activation;B cell activation involved in immune response;biological regulation;catabolic process;cell activation;cell activation involved in immune response;cell aging;cell proliferation;cellular catabolic process;cellular component organization;cellular component organization at cellular level;…	binding;catalytic activity;damaged DNA binding;DNA binding;endonuclease activity;hydrolase activity;hydrolase activity, acting on ester bonds;nuclease activity;nucleic acid binding;protein binding;protein C-terminus binding;protein domain specific binding;single-stranded DNA binding;structure-specific DNA binding	cell part;chromosomal part;chromosome, telomeric region;cytoplasm;intracellular organelle part;intracellular part;macromolecular complex;nuclear chromosome part;nuclear chromosome, telomeric region;nuclear part;nucleoplasm;nucleoplasm part;nucleotide-excision repair complex;nucleotide-excision repair factor 1 complex;organelle part;protein complex;transcription factor complex;transcription factor…	Nucleotide excision repair	ERCC1-ERCC4-MSH2 complex;RAD52-ERCC4-ERCC1 complex;Structure-specific endonulease complex;XPA-ERCC1-ERCC4 complex	REACT_1941;REACT_2222;REACT_257;REACT_311	1	1	1	1	1	1	1	1	1.12459	0.0128079	1.68918	1.71403	P07992	P07992	P07992	ERCC1_HUMAN	>sp|P07992|ERCC1_HUMAN DNA excision repair protein ERCC-1 OS=Homo sapiens OX=9606 GN=ERCC1 PE=1 SV=1
TPP1	Tripeptidyl-peptidase 1	2.50717	1.32606	+	16.2389	15.9033	15.8747	15.9928	17.255	17.2765	17.4362	17.2731	77338.5	61287.3	60084.3	65209.7	156413	158761	177345	158388	63248.5	158574	2.50717	+	PD_HC	anatomical structure development;anatomical structure homeostasis;biological regulation;bone resorption;catabolic process;cell differentiation;cellular catabolic process;cellular component organization;cellular component organization at cellular level;cellular component organization or biogenesis;cellular component organization or biogenesis at cellular level;cellular developmental process;cellul…	binding;catalytic activity;cation binding;endopeptidase activity;exopeptidase activity;hydrolase activity;ion binding;metal ion binding;peptidase activity;peptidase activity, acting on L-amino acid peptides;peptide binding;serine hydrolase activity;serine-type endopeptidase activity;serine-type peptidase activity;tripeptidyl-peptidase activity	cell part;cytoplasmic membrane-bounded vesicle;cytoplasmic part;cytoplasmic vesicle;extracellular membrane-bounded organelle;extracellular organelle;extracellular region part;extracellular vesicular exosome;intracellular membrane-bounded organelle;intracellular organelle;intracellular organelle lumen;intracellular organelle part;intracellular part;lysosomal lumen;lysosome;lytic vacuole;melanosome…	Lysosome		REACT_18273	8	8	8	8	8	8	8	8	5.09545	0.000350515	1.30777	4.4647	O14773	O14773	O14773	TPP1_HUMAN	>sp|O14773|TPP1_HUMAN Tripeptidyl-peptidase 1 OS=Homo sapiens OX=9606 GN=TPP1 PE=1 SV=2
TPPP3	Tubulin polymerization-promoting protein family member 3	2.48823	1.31512	+	15.4169	15.8837	15.718	15.7595	17.1731	17.026	17.0815	16.9718	43747.1	60460.3	53900.1	55473.1	147781	133456	138690	128535	54686.6	136073	2.48823	+	PD_HC	cellular component organization;cellular component organization at cellular level;cellular component organization or biogenesis;cellular component organization or biogenesis at cellular level;cellular process;cytoskeleton organization;microtubule bundle formation;microtubule cytoskeleton organization;microtubule-based process;organelle organization	binding;cytoskeletal protein binding;protein binding;tubulin binding	cell part;cytoplasm;cytoskeletal part;extracellular membrane-bounded organelle;extracellular organelle;extracellular region part;extracellular vesicular exosome;intracellular organelle part;intracellular part;macromolecular complex;membrane-bounded organelle;membrane-bounded vesicle;microtubule;organelle;organelle part;protein complex;vesicle				12	12	12	12	12	12	12	12	4.83101	0.000341709	1.36856	4.44425	Q9BW30	Q9BW30	Q9BW30	TPPP3_HUMAN	>sp|Q9BW30|TPPP3_HUMAN Tubulin polymerization-promoting protein family member 3 OS=Homo sapiens OX=9606 GN=TPPP3 PE=1 SV=1
ULBP3	UL16-binding protein 3	2.48613	1.3139	+	10.0038	10.0863	10.3496	8.85804	11.3967	11.4371	11.2044	11.3214	1026.7	1087.12	1304.79	464.019	2696.18	2772.75	2359.72	2559.06	1056.91	2627.62	2.48613	+	PD_HC	antigen processing and presentation;antigen processing and presentation of peptide antigen;antigen processing and presentation of peptide antigen via MHC class I;biological regulation;cell activation;cell killing;cellular process;defense response;immune effector process;immune response;immune system process;induction of apoptosis;induction of programmed cell death;innate immune response;leukocyte…	antigen binding;binding;natural killer cell lectin-like receptor binding;peptide antigen binding;peptide binding;protein binding;receptor binding	anchored to membrane;anchored to plasma membrane;cell part;intrinsic to membrane;intrinsic to plasma membrane;membrane;membrane part;plasma membrane;plasma membrane part	Natural killer cell mediated cytotoxicity	ULBP3-KLRK1-HCST complex	REACT_11152	1	1	1	1	1	1	1	1	2.40155	0.00175196	1.51546	2.83585	Q9BZM4	Q9BZM4	Q9BZM4	ULBP3_HUMAN	>sp|Q9BZM4|ULBP3_HUMAN UL16-binding protein 3 OS=Homo sapiens OX=9606 GN=ULBP3 PE=1 SV=1
HLA-C	HLA class I histocompatibility antigen, C alpha chain	2.48098	1.31091	+	13.0227	13.1562	13.2302	13.4968	14.2483	14.5145	14.6502	14.4946	8321.92	9128.74	9609.2	11559.6	19461	23404.5	25712.8	23083.9	9368.97	23244.2	2.48098	+	PD_HC	antigen processing and presentation;antigen processing and presentation of exogenous antigen;antigen processing and presentation of exogenous peptide antigen;antigen processing and presentation of exogenous peptide antigen via MHC class I;antigen processing and presentation of exogenous peptide antigen via MHC class I, TAP-dependent;antigen processing and presentation of exogenous peptide antigen…	antigen binding;binding;peptide antigen binding;peptide binding	cell part;cell surface;coated vesicle membrane;cytoplasmic part;cytoplasmic vesicle membrane;cytoplasmic vesicle part;early endosome membrane;endocytic vesicle membrane;endoplasmic reticulum;endoplasmic reticulum part;endosomal part;endosome membrane;ER to Golgi transport vesicle membrane;extracellular membrane-bounded organelle;extracellular organelle;extracellular region part;extracellular vesi…	Allograft rejection;Antigen processing and presentation;Autoimmune thyroid disease;Cell adhesion molecules (CAMs);Endocytosis;Graft-versus-host disease;Natural killer cell mediated cytotoxicity;Phagosome;Type I diabetes mellitus;Viral myocarditis		REACT_111168;REACT_111178;REACT_11152;REACT_25078;REACT_25162;REACT_75795	2	2	2	2	2	2	2	2	4.1364	0.000716981	1.25044	3.78637	P10321	P10321	P10321	HLAC_HUMAN	>sp|P10321|HLAC_HUMAN HLA class I histocompatibility antigen, C alpha chain OS=Homo sapiens OX=9606 GN=HLA-C PE=1 SV=3
CLU	Clusterin	2.4699	1.30445	+	17.0758	17.1418	17.2754	17.2673	18.4716	18.6039	18.5466	18.4732	138143	144609	158640	157752	363501	398412	382898	363904	151181	373401	2.4699	+	PD_HC	activation of immune response;anatomical structure morphogenesis;apoptotic mitochondrial changes;biological regulation;blood coagulation;cell activation;cell morphogenesis;cellular component assembly;cellular component assembly at cellular level;cellular component morphogenesis;cellular component organization;cellular component organization at cellular level;cellular component organization or bio…	binding;chaperone binding;enzyme binding;misfolded protein binding;protein binding;ubiquitin protein ligase binding	blood microparticle;cell part;chromaffin granule;cytoplasm;cytoplasmic membrane-bounded vesicle;cytoplasmic membrane-bounded vesicle lumen;cytoplasmic part;cytoplasmic vesicle;cytoplasmic vesicle part;cytosol;endoplasmic reticulum;extracellular matrix;extracellular membrane-bounded organelle;extracellular organelle;extracellular region;extracellular region part;extracellular space;extracellular v…			REACT_318	18	18	18	18	18	18	18	18	6.33793	0.000576271	1.33376	5.16262	P10909	P10909	P10909	CLUS_HUMAN	>sp|P10909|CLUS_HUMAN Clusterin OS=Homo sapiens OX=9606 GN=CLU PE=1 SV=1
HSPB1	Heat shock protein beta-1	2.46877	1.30379	+	18.3567	17.9957	17.7568	17.9892	19.2723	19.2638	19.3587	19.3198	335674	261364	221477	260189	633199	629480	672279	654394	260776	643797	2.46877	+	PD_HC	anatomical structure homeostasis;biological adhesion;biological regulation;cell adhesion;cell surface receptor linked signaling pathway;cell-cell adhesion;cellular component movement;cellular process;cellular response to chemical stimulus;cellular response to growth factor stimulus;cellular response to organic substance;cellular response to stimulus;cellular response to vascular endothelial growt…	binding;enzyme binding;enzyme inhibitor activity;enzyme regulator activity;identical protein binding;kinase binding;kinase inhibitor activity;kinase regulator activity;protein binding;protein kinase binding;protein kinase C binding;protein kinase C inhibitor activity;protein kinase inhibitor activity;protein kinase regulator activity;protein serine/threonine kinase inhibitor activity;small conjug…	adherens junction;anchoring junction;cell junction;cell part;cell-substrate adherens junction;cell-substrate junction;contractile fiber part;cytoplasm;cytoplasmic part;cytoskeletal part;cytoskeleton;cytosol;extracellular membrane-bounded organelle;extracellular organelle;extracellular region part;extracellular space;extracellular vesicular exosome;focal adhesion;intracellular membrane-bounded org…	Amoebiasis;MAPK signaling pathway;VEGF signaling pathway		REACT_25325;REACT_264464	12	12	12	12	12	12	12	12	4.278	0.000614286	1.27906	3.92571	P04792	P04792	P04792	HSPB1_HUMAN	>sp|P04792|HSPB1_HUMAN Heat shock protein beta-1 OS=Homo sapiens OX=9606 GN=HSPB1 PE=1 SV=2
POMT2	Protein O-mannosyl-transferase 2	2.46253	1.30014	+	9.98186	11.1524	10.6082	10.8339	12.1339	11.8354	11.9799	12.0699	1011.21	2276.18	1560.94	1825.28	4494.36	3654.35	4039.33	4299.34	1693.11	4169.34	2.46253	+	PD_HC		binding;catalytic activity;cation binding;dolichyl-phosphate-mannose-protein mannosyltransferase activity;ion binding;mannosyltransferase activity;metal ion binding;transferase activity;transferase activity, transferring glycosyl groups;transferase activity, transferring hexosyl groups	cell part;cytoplasmic part;endoplasmic reticulum membrane;endoplasmic reticulum part;integral to membrane;intracellular organelle part;intracellular part;intrinsic to membrane;membrane;membrane part;organelle membrane;organelle part	Other types of O-glycan biosynthesis			3	3	3	3	3	3	3	3	2.74658	0.00145078	1.36068	2.98599	Q9UKY4	Q9UKY4	Q9UKY4	POMT2_HUMAN	>sp|Q9UKY4|POMT2_HUMAN Protein O-mannosyl-transferase 2 OS=Homo sapiens OX=9606 GN=POMT2 PE=1 SV=2
EPHA5	Ephrin type-A receptor 5	2.46011	1.29872	+	16.6139	15.5481	15.9389	15.4143	16.9562	17.0109	17.2769	17.0986	100296	47912	62818.4	43668.3	127152	132066	158805	140343	55365.2	136205	2.46011	+	PD_HC	anatomical structure development;axon guidance;biological regulation;cAMP-mediated signaling;cell development;cell surface receptor linked signaling pathway;cellular developmental process;cellular process;cellular response to stimulus;chemotaxis;cyclic-nucleotide-mediated signaling;developmental process;enzyme linked receptor protein signaling pathway;ephrin receptor signaling pathway;hippocampus…	adenyl nucleotide binding;adenyl ribonucleotide binding;ATP binding;binding;catalytic activity;ephrin receptor activity;GPI-linked ephrin receptor activity;kinase activity;molecular transducer activity;nucleotide binding;phosphotransferase activity, alcohol group as acceptor;protein kinase activity;protein tyrosine kinase activity;purine nucleotide binding;purine ribonucleoside triphosphate bindi…	axon;cell body;cell part;cell projection;cytoplasmic part;dendrite;endoplasmic reticulum;external side of plasma membrane;integral to membrane;integral to plasma membrane;intracellular membrane-bounded organelle;intracellular organelle;intracellular part;intrinsic to membrane;intrinsic to plasma membrane;membrane;membrane part;membrane-bounded organelle;neuron projection;neuronal cell body;organe…	Axon guidance		REACT_264068;REACT_264198;REACT_264548	1	1	1	1	1	1	1	1	2.31182	0.00247059	1.20687	2.52428	P54756	P54756	P54756	EPHA5_HUMAN	>sp|P54756|EPHA5_HUMAN Ephrin type-A receptor 5 OS=Homo sapiens OX=9606 GN=EPHA5 PE=1 SV=3
LIG4	DNA ligase 4	2.45584	1.29622	+	10.4229	9.6782	10.4518	7.54958	11.1325	11.6854	11.0811	11.6158	1372.79	819.273	1400.57	187.348	2245	3293.49	2166.42	3138.37	1096.03	2691.69	2.45584	+	PD_HC	anatomical structure development;apoptosis;B cell activation;B cell activation involved in immune response;biological regulation;biosynthetic process;cell activation;cell activation involved in immune response;cell cycle;cell death;cell differentiation;cell division;cell proliferation;cellular biosynthetic process;cellular component organization;cellular component organization at cellular level;c…	adenyl nucleotide binding;adenyl ribonucleotide binding;ATP binding;binding;catalytic activity;cation binding;DNA binding;DNA ligase (ATP) activity;DNA ligase activity;ion binding;ligase activity;ligase activity, forming phosphoric ester bonds;metal ion binding;nucleic acid binding;nucleotide binding;protein binding;protein C-terminus binding;purine nucleotide binding;purine ribonucleoside tripho…	adherens junction;anchoring junction;cell junction;cell part;cell-substrate adherens junction;cell-substrate junction;chromosome;condensed chromosome;cytoplasm;DNA ligase IV complex;DNA-dependent protein kinase-DNA ligase 4 complex;focal adhesion;intracellular membrane-bounded organelle;intracellular non-membrane-bounded organelle;intracellular organelle;intracellular organelle part;intracellular…	Non-homologous end-joining	DNA double-strand break end-joining complex;DNA ligase IV-condensin complex;DNA ligase IV-XRCC1 complex;DNA ligase IV-XRCC4 complex;DNA ligase IV-XRCC4 complex (LX complex);DNA ligase IV-XRCC4-AHNK complex;DNA ligase IV-XRCC4-PNK complex;DNA ligase IV-XRCC4-XLF complex	REACT_1022;REACT_9058	3	3	3	3	3	3	3	3	1.41696	0.00588525	1.85309	2.05759	P49917	P49917	P49917	DNLI4_HUMAN	>sp|P49917|DNLI4_HUMAN DNA ligase 4 OS=Homo sapiens OX=9606 GN=LIG4 PE=1 SV=2
PALLD	Palladin	2.4536	1.2949	+	15.4916	15.7727	15.7106	15.5899	16.994	16.8802	16.8972	17.0216	46071.9	55983	53624.3	49320.5	130528	120628	122057	133049	51472.4	126293	2.4536	+	PD_HC	cellular component organization;cellular component organization at cellular level;cellular component organization or biogenesis;cellular component organization or biogenesis at cellular level;cellular process;cytoskeleton organization;organelle organization	actinin binding;alpha-actinin binding;binding;cytoskeletal protein binding;muscle alpha-actinin binding;protein binding	actin cytoskeleton;actin filament;adherens junction;anchoring junction;cell junction;cell part;cell projection;cell-substrate adherens junction;cell-substrate junction;contractile fiber part;cytoplasm;cytoplasmic part;cytoskeletal part;cytoskeleton;focal adhesion;intracellular membrane-bounded organelle;intracellular non-membrane-bounded organelle;intracellular organelle;intracellular organelle p…				30	30	30	30	30	30	30	30	5.75217	0.00042236	1.30704	4.80883	Q8WX93	Q8WX93	Q8WX93	PALLD_HUMAN	>sp|Q8WX93|PALLD_HUMAN Palladin OS=Homo sapiens OX=9606 GN=PALLD PE=1 SV=3
CACHD1	VWFA and cache domain-containing protein 1	2.45053	1.29309	+	11.0051	10.5675	11.0607	10.3659	12.2854	12.0601	12.1146	12.077	2055.25	1517.52	2136.01	1319.61	4991.99	4270.24	4434.64	4320.55	1786.39	4377.59	2.45053	+	PD_HC	calcium ion transport;cation transport;divalent inorganic cation transport;divalent metal ion transport;establishment of localization;ion transport;metal ion transport;transport		cell part;integral to membrane;intrinsic to membrane;membrane part				6	6	6	6	6	6	6	6	3.64195	0.000666667	1.3845	3.6757	Q5VU97	Q5VU97	Q5VU97	CAHD1_HUMAN	>sp|Q5VU97|CAHD1_HUMAN VWFA and cache domain-containing protein 1 OS=Homo sapiens OX=9606 GN=CACHD1 PE=2 SV=2
TUBA3E	Tubulin alpha-3E chain	2.44399	1.28924	+	10.8129	10.8831	12.4463	12.0705	12.569	13.1439	13.509	11.0654	1798.9	1888.6	5580.97	4301.13	6076.4	9051.24	11657.7	2142.98	3094.86	7563.82	2.44399	+	PD_HC	cellular component assembly;cellular component assembly at cellular level;cellular component organization;cellular component organization at cellular level;cellular component organization or biogenesis;cellular component organization or biogenesis at cellular level;cellular macromolecular complex assembly;cellular macromolecular complex subunit organization;cellular process;cellular protein compl…	binding;catalytic activity;GTP binding;GTPase activity;guanyl nucleotide binding;guanyl ribonucleotide binding;hydrolase activity;hydrolase activity, acting on acid anhydrides;hydrolase activity, acting on acid anhydrides, in phosphorus-containing anhydrides;nucleoside-triphosphatase activity;nucleotide binding;purine nucleotide binding;purine ribonucleoside triphosphate binding;purine ribonucleo…	cell part;cytoplasm;cytoskeletal part;intracellular membrane-bounded organelle;intracellular organelle;intracellular organelle part;intracellular part;macromolecular complex;membrane-bounded organelle;microtubule;nucleus;organelle;organelle part;protein complex	Gap junction;Pathogenic Escherichia coli infection;Phagosome			1	1	1	1	1	1	1	1	0.734238	0.0471222	1.01862	1.15845	Q6PEY2	Q6PEY2	Q6PEY2	TBA3E_HUMAN	>sp|Q6PEY2|TBA3E_HUMAN Tubulin alpha-3E chain OS=Homo sapiens OX=9606 GN=TUBA3E PE=1 SV=2
QKI	Protein quaking	2.44085	1.28738	+	15.4007	15.6529	15.4144	15.6004	16.7828	16.777	16.8126	16.8308	43258.6	51522	43671.4	49680.8	112753	112300	115106	116567	46676.1	113929	2.44085	+	PD_HC	3'-UTR-mediated mRNA destabilization;anatomical structure development;axon ensheathment;biological regulation;biosynthetic process;carboxylic acid biosynthetic process;carboxylic acid metabolic process;cell development;cell differentiation;cellular biosynthetic process;cellular developmental process;cellular ketone metabolic process;cellular lipid metabolic process;cellular macromolecule metaboli…	binding;mRNA binding;nucleic acid binding;RNA binding	cell part;cytoplasm;intracellular membrane-bounded organelle;intracellular organelle;intracellular part;membrane-bounded organelle;nucleus;organelle				13	13	13	13	13	13	13	13	5.94326	0.000433121	1.28367	4.83568	Q96PU8	Q96PU8	Q96PU8	QKI_HUMAN	>sp|Q96PU8|QKI_HUMAN Protein quaking OS=Homo sapiens OX=9606 GN=QKI PE=1 SV=1
DENND5A	DENN domain-containing protein 5A	2.43803	1.28572	+	8.49465	10.0893	9.44792	9.08897	10.5769	10.6635	10.5536	9.93929	360.699	1089.39	698.405	544.569	1527.44	1621.93	1502.97	981.803	621.487	1515.2	2.43803	+	PD_HC	biological regulation;cellular process;endosome transport;establishment of localization;establishment of localization in cell;intracellular transport;positive regulation of catalytic activity;positive regulation of GTPase activity;positive regulation of hydrolase activity;positive regulation of molecular function;regulation of biological process;regulation of catabolic process;regulation of catal…	enzyme regulator activity;GTPase regulator activity;guanyl-nucleotide exchange factor activity;nucleoside-triphosphatase regulator activity;Rab guanyl-nucleotide exchange factor activity;Ras guanyl-nucleotide exchange factor activity;small GTPase regulator activity	cell part;cytoplasmic part;Golgi apparatus part;intracellular organelle part;intracellular part;membrane;organelle part;trans-Golgi network				3	3	3	3	3	3	3	3	1.67115	0.00647799	1.15312	2.01281	Q6IQ26	Q6IQ26	Q6IQ26	DEN5A_HUMAN	>sp|Q6IQ26|DEN5A_HUMAN DENN domain-containing protein 5A OS=Homo sapiens OX=9606 GN=DENND5A PE=1 SV=2
NRBP2	Nuclear receptor-binding protein 2	2.43453	1.28364	+	12.1921	11.2452	12.1728	11.9272	13.3786	13.298	13.5383	13.0462	4679.37	2427.41	4617.19	3894.44	10650.3	10071.6	11896.9	8458.58	4255.82	10360.9	2.43453	+	PD_HC	biological regulation;cell differentiation;cellular developmental process;cellular process;developmental process;negative regulation of apoptosis;negative regulation of autophagy;negative regulation of biological process;negative regulation of catabolic process;negative regulation of cell communication;negative regulation of cell death;negative regulation of cellular catabolic process;negative re…	adenyl nucleotide binding;adenyl ribonucleotide binding;ATP binding;binding;catalytic activity;kinase activity;nucleotide binding;phosphotransferase activity, alcohol group as acceptor;protein kinase activity;purine nucleotide binding;purine ribonucleoside triphosphate binding;purine ribonucleotide binding;ribonucleotide binding;transferase activity;transferase activity, transferring phosphorus-c…	cell part;cytoplasm;intracellular part				12	12	12	12	12	12	12	12	2.96333	0.00101895	1.43098	3.22253	Q9NSY0	Q9NSY0	Q9NSY0	NRBP2_HUMAN	>sp|Q9NSY0|NRBP2_HUMAN Nuclear receptor-binding protein 2 OS=Homo sapiens OX=9606 GN=NRBP2 PE=1 SV=2
COLGALT2	Procollagen galactosyltransferase 2	2.42132	1.27579	+	6.56424	9.55234	9.89789	8.35799	10.9497	10.1877	10.498	9.48304	94.6309	750.829	954.029	328.1	1977.83	1166.28	1446.15	715.615	539.464	1306.21	2.42132	+	PD_HC	cellular component organization;cellular component organization at cellular level;cellular component organization or biogenesis;cellular component organization or biogenesis at cellular level;cellular process;extracellular matrix organization;extracellular structure organization	catalytic activity;galactosyltransferase activity;procollagen galactosyltransferase activity;transferase activity;transferase activity, transferring glycosyl groups;transferase activity, transferring hexosyl groups;UDP-galactosyltransferase activity;UDP-glycosyltransferase activity	cell part;cytoplasmic part;endoplasmic reticulum lumen;endoplasmic reticulum part;intracellular organelle lumen;intracellular organelle part;intracellular part;membrane-enclosed lumen;organelle lumen;organelle part	Lysine degradation;Other types of O-glycan biosynthesis		REACT_121139	1	1	1	1	1	1	1	1	1.07878	0.0144388	1.6865	1.66467	Q8IYK4	Q8IYK4	Q8IYK4	GT252_HUMAN	>sp|Q8IYK4|GT252_HUMAN Procollagen galactosyltransferase 2 OS=Homo sapiens OX=9606 GN=COLGALT2 PE=1 SV=1
AHDC1	AT-hook DNA-binding motif-containing protein 1	2.42105	1.27563	+	10.8924	10.0405	9.65571	10.0704	11.3814	11.3787	10.8534	11.282	1900.81	1053.15	806.6	1075.21	2667.74	2662.75	1850.12	2490.12	1064.18	2576.43	2.42105	+	PD_HC		binding;DNA binding;nucleic acid binding					1	1	1	1	1	1	1	1	1.97793	0.00446911	1.05912	2.16583	Q5TGY3	Q5TGY3	Q5TGY3	AHDC1_HUMAN	>sp|Q5TGY3|AHDC1_HUMAN AT-hook DNA-binding motif-containing protein 1 OS=Homo sapiens OX=9606 GN=AHDC1 PE=1 SV=1
SLC1A2	Excitatory amino acid transporter 2	2.41599	1.27261	+	11.9963	11.2103	11.6517	11.4405	13.0307	12.8036	12.8413	12.3304	4085.51	2369.39	3217.45	2779.29	8368.19	7149.37	7338.66	5150.15	2998.37	7244.01	2.41599	+	PD_HC	acidic amino acid transport;adult behavior;aging;amine transport;amino acid import;amino acid transport;anatomical structure development;anion transport;aspartate transport;behavior;biological regulation;carboxylic acid transport;cell communication;cell-cell signaling;cellular process;cellular response to external stimulus;cellular response to extracellular stimulus;cellular response to stimulus;…	acidic amino acid transmembrane transporter activity;active transmembrane transporter activity;amine transmembrane transporter activity;amino acid transmembrane transporter activity;anion transmembrane transporter activity;anion:cation symporter activity;carboxylic acid transmembrane transporter activity;cation transmembrane transporter activity;cation:amino acid symporter activity;dicarboxylic a…	axolemma;axon part;cell part;cell projection membrane;cell projection part;integral to membrane;intrinsic to membrane;leading edge membrane;membrane;membrane part;neuron projection membrane;plasma membrane;plasma membrane part	Amyotrophic lateral sclerosis (ALS)	SLC1A2 homotrimer complex	REACT_12591;REACT_13639;REACT_19397	7	7	7	7	7	7	7	7	2.72108	0.00166567	1.17677	2.77733	P43004	P43004	P43004	EAA2_HUMAN	>sp|P43004|EAA2_HUMAN Excitatory amino acid transporter 2 OS=Homo sapiens OX=9606 GN=SLC1A2 PE=1 SV=2
NME4	Nucleoside diphosphate kinase, mitochondrial	2.41534	1.27223	+	11.2771	12.2962	12.3797	12.2244	13.4312	13.6145	13.5748	13.4899	2481.68	5029.5	5329.19	4785.32	11045.7	12542.2	12201.7	11504.4	4907.41	11853.1	2.41534	+	PD_HC	biological regulation;biosynthetic process;cellular biosynthetic process;cellular metabolic process;cellular nitrogen compound biosynthetic process;cellular nitrogen compound metabolic process;cellular process;CTP biosynthetic process;CTP metabolic process;establishment of localization;GTP biosynthetic process;GTP metabolic process;heterocycle biosynthetic process;heterocycle metabolic process;li…	adenyl nucleotide binding;adenyl ribonucleotide binding;ATP binding;binding;catalytic activity;cation binding;ion binding;kinase activity;lipid binding;metal ion binding;nucleobase-containing compound kinase activity;nucleoside diphosphate kinase activity;nucleotide binding;phosphotransferase activity, phosphate group as acceptor;purine nucleotide binding;purine ribonucleoside triphosphate bindin…	cell part;cytoplasmic part;cytosol;intracellular membrane-bounded organelle;intracellular organelle;intracellular organelle lumen;intracellular organelle part;intracellular part;membrane;membrane-bounded organelle;membrane-enclosed lumen;mitochondrial inner membrane;mitochondrial intermembrane space;mitochondrial matrix;mitochondrial membrane;mitochondrial part;mitochondrion;organelle;organelle e…	Purine metabolism;Pyrimidine metabolism		REACT_21330	4	4	4	4	4	4	4	4	2.89272	0.00101044	1.48324	3.21737	O00746	O00746	O00746	NDKM_HUMAN	>sp|O00746|NDKM_HUMAN Nucleoside diphosphate kinase, mitochondrial OS=Homo sapiens OX=9606 GN=NME4 PE=1 SV=1
STK33	Serine/threonine-protein kinase 33	2.41263	1.27061	+	14.0642	14.1769	13.9236	14.2431	15.2618	15.4544	15.3792	15.4052	17129.6	18521.3	15538.9	19391	39288	44899.1	42618.7	43393.8	17825.4	43006.2	2.41263	+	PD_HC	cellular macromolecule metabolic process;cellular metabolic process;cellular process;cellular protein metabolic process;macromolecule metabolic process;macromolecule modification;metabolic process;phosphate-containing compound metabolic process;phosphorus metabolic process;phosphorylation;primary metabolic process;protein autophosphorylation;protein metabolic process;protein modification process;…	adenyl nucleotide binding;adenyl ribonucleotide binding;ATP binding;binding;catalytic activity;kinase activity;nucleotide binding;phosphotransferase activity, alcohol group as acceptor;protein kinase activity;protein serine/threonine kinase activity;purine nucleotide binding;purine ribonucleoside triphosphate binding;purine ribonucleotide binding;ribonucleotide binding;transferase activity;transf…	cell part;cytoplasmic part;intracellular part;perinuclear region of cytoplasm				8	8	8	8	8	8	8	8	5.37503	0.000365591	1.27321	4.53022	Q9BYT3	Q9BYT3	Q9BYT3	STK33_HUMAN	>sp|Q9BYT3|STK33_HUMAN Serine/threonine-protein kinase 33 OS=Homo sapiens OX=9606 GN=STK33 PE=1 SV=1
PRSS23	Serine protease 23	2.40565	1.26643	+	12.2014	9.36029	11.4475	9.9966	12.2844	12.1569	11.7383	12.1704	4709.64	657.246	2792.81	1021.59	4988.53	4566.59	3416.49	4609.52	1907.2	4588.05	2.40565	+	PD_HC		catalytic activity;endopeptidase activity;hydrolase activity;peptidase activity;peptidase activity, acting on L-amino acid peptides;serine hydrolase activity;serine-type endopeptidase activity;serine-type peptidase activity	cell part;extracellular membrane-bounded organelle;extracellular organelle;extracellular region part;extracellular vesicular exosome;intracellular membrane-bounded organelle;intracellular organelle;intracellular part;membrane-bounded organelle;membrane-bounded vesicle;nucleus;organelle;vesicle				1	1	1	1	1	1	1	1	1.04449	0.0183834	1.33602	1.54929	O95084	O95084	O95084	PRS23_HUMAN	>sp|O95084|PRS23_HUMAN Serine protease 23 OS=Homo sapiens OX=9606 GN=PRSS23 PE=1 SV=1
PARP14	Protein mono-ADP-ribosyltransferase PARP14	2.40373	1.26527	+	4.28203	7.53467	6.71838	7.62313	8.34282	8.80887	8.54748	6.51152	19.4545	185.422	105.301	197.147	324.668	448.471	374.152	91.2353	145.362	349.41	2.40373	+	PD_HC	biological regulation;biosynthetic process;cellular biosynthetic process;cellular macromolecule biosynthetic process;cellular macromolecule metabolic process;cellular metabolic process;cellular nitrogen compound metabolic process;cellular process;macromolecule biosynthetic process;macromolecule metabolic process;metabolic process;nitrogen compound metabolic process;nucleic acid metabolic process;…	catalytic activity;NAD+ ADP-ribosyltransferase activity;transferase activity;transferase activity, transferring glycosyl groups;transferase activity, transferring pentosyl groups	cell part;cytoplasm;intracellular membrane-bounded organelle;intracellular organelle;intracellular part;membrane;membrane-bounded organelle;nucleus;organelle;plasma membrane				1	1	1	1	1	1	1	1	0.801295	0.032141	1.51312	1.32908	Q460N5	Q460N5	Q460N5	PAR14_HUMAN	>sp|Q460N5|PAR14_HUMAN Protein mono-ADP-ribosyltransferase PARP14 OS=Homo sapiens OX=9606 GN=PARP14 PE=1 SV=3
BAALC	Brain and acute leukemia cytoplasmic protein	2.38715	1.25529	+	12.5383	12.067	12.5402	12.4854	13.0233	14.0442	13.7868	13.7477	5948.46	4290.71	5956.3	5734.29	8325.38	16893.7	14133.2	13755.3	5841.38	13944.2	2.38715	+	PD_HC			cell part;cytoplasm;intracellular part;membrane				4	4	4	4	4	4	4	4	2.62249	0.00167066	1.24278	2.77919	Q8WXS3	Q8WXS3	Q8WXS3	BAALC_HUMAN	>sp|Q8WXS3|BAALC_HUMAN Brain and acute leukemia cytoplasmic protein OS=Homo sapiens OX=9606 GN=BAALC PE=1 SV=4
FAM120C	Constitutive coactivator of PPAR-gamma-like protein 2	2.37737	1.24936	+	10.4603	10.4212	10.4828	10.7481	11.7032	11.3685	11.7385	12.0444	1408.85	1371.18	1430.99	1719.89	3334.37	2643.99	3416.97	4224.02	1419.92	3375.67	2.37737	+	PD_HC							1	1	1	1	1	1	1	1	3.55325	0.0010852	1.18559	3.32107	Q9NX05	Q9NX05	Q9NX05	F120C_HUMAN	>sp|Q9NX05|F120C_HUMAN Constitutive coactivator of PPAR-gamma-like protein 2 OS=Homo sapiens OX=9606 GN=FAM120C PE=1 SV=3
ACAD11	Acyl-CoA dehydrogenase family member 11	2.37366	1.24711	+	13.2567	11.3985	11.9043	11.1343	12.9274	12.9376	12.9137	12.6697	9787.33	2699.54	3833.11	2247.8	7789.96	7845.23	7716.33	6515.68	3266.33	7753.15	2.37366	+	PD_HC	carboxylic acid catabolic process;carboxylic acid metabolic process;catabolic process;cellular catabolic process;cellular ketone metabolic process;cellular lipid catabolic process;cellular lipid metabolic process;cellular metabolic process;cellular process;fatty acid beta-oxidation;fatty acid beta-oxidation using acyl-CoA dehydrogenase;fatty acid catabolic process;fatty acid metabolic process;fat…	acyl-CoA dehydrogenase activity;binding;catalytic activity;coenzyme binding;cofactor binding;flavin adenine dinucleotide binding;long-chain-acyl-CoA dehydrogenase activity;medium-chain-acyl-CoA dehydrogenase activity;oxidoreductase activity;oxidoreductase activity, acting on the CH-CH group of donors;transferase activity;transferase activity, transferring phosphorus-containing groups;very long-ch…	cell part;cytoplasmic part;intracellular membrane-bounded organelle;intracellular organelle;intracellular organelle part;intracellular part;membrane;membrane-bounded organelle;microbody;mitochondrial membrane;mitochondrial part;nucleus;organelle;organelle membrane;organelle part;peroxisome				4	4	4	4	4	4	4	4	1.01576	0.0279592	0.938632	1.38724	Q709F0	Q709F0	Q709F0	ACD11_HUMAN	>sp|Q709F0|ACD11_HUMAN Acyl-CoA dehydrogenase family member 11 OS=Homo sapiens OX=9606 GN=ACAD11 PE=1 SV=3
IFT140	Intraflagellar transport protein 140 homolog	2.36998	1.24487	+	11.7522	12.1764	12.3485	12.1581	13.4595	13.3327	13.4831	13.3632	3449.57	4628.73	5215.18	4570.39	11264.5	10316.7	11450.3	10537.2	4599.56	10900.9	2.36998	+	PD_HC	anatomical structure development;anatomical structure formation involved in morphogenesis;anatomical structure morphogenesis;cell projection assembly;cell projection organization;cellular component assembly;cellular component assembly at cellular level;cellular component assembly involved in morphogenesis;cellular component movement;cellular component organization;cellular component organization …		axoneme;axoneme part;cell part;cell projection;cell projection part;centrosome;cilium;cytoplasmic part;cytoskeletal part;intracellular non-membrane-bounded organelle;intracellular organelle;intracellular organelle part;intracellular part;intraflagellar transport particle A;macromolecular complex;microtubule organizing center;non-membrane-bounded organelle;nonmotile primary cilium;organelle;organe…			REACT_268024;REACT_268323	9	9	9	9	9	9	9	9	4.2101	0.000609929	1.30081	3.92387	Q96RY7	Q96RY7	Q96RY7	IF140_HUMAN	>sp|Q96RY7|IF140_HUMAN Intraflagellar transport protein 140 homolog OS=Homo sapiens OX=9606 GN=IFT140 PE=1 SV=1
MRI1	Methylthioribose-1-phosphate isomerase	2.36788	1.2436	+	13.3405	12.8467	13.0514	13.1948	14.3534	14.3834	14.4358	14.1413	10372.7	7366.18	8489.12	9376.28	20931.7	21371.5	22162	18069.9	8932.7	21151.6	2.36788	+	PD_HC	amine biosynthetic process;amine metabolic process;amino acid salvage;aspartate family amino acid biosynthetic process;aspartate family amino acid metabolic process;biosynthetic process;carboxylic acid biosynthetic process;carboxylic acid metabolic process;cellular amine metabolic process;cellular amino acid biosynthetic process;cellular amino acid metabolic process;cellular biogenic amine metabo…	binding;catalytic activity;identical protein binding;intramolecular oxidoreductase activity;intramolecular oxidoreductase activity, interconverting aldoses and ketoses;isomerase activity;protein binding;S-methyl-5-thioribose-1-phosphate isomerase activity	cell part;cell projection;cytoplasm;cytoplasmic part;cytosol;intracellular non-membrane-bounded organelle;intracellular organelle;intracellular organelle part;intracellular part;non-membrane-bounded organelle;nuclear part;nucleolus;organelle;organelle part	Cysteine and methionine metabolism		REACT_75881	9	9	9	9	9	9	9	9	4.20562	0.000703704	1.22013	3.77073	Q9BV20	Q9BV20	Q9BV20	MTNA_HUMAN	>sp|Q9BV20|MTNA_HUMAN Methylthioribose-1-phosphate isomerase OS=Homo sapiens OX=9606 GN=MRI1 PE=1 SV=1
NRIP2	Nuclear receptor-interacting protein 2	2.36755	1.2434	+	13.5647	13.7163	14.1042	13.6871	14.4796	14.6797	15.6491	15.1693	12116.6	13459.2	17611.1	13189.5	22845.1	26244	51386.4	36848	13324.3	31546	2.36755	+	PD_HC	biological regulation;biosynthetic process;cellular biosynthetic process;cellular macromolecule biosynthetic process;cellular macromolecule metabolic process;cellular metabolic process;cellular nitrogen compound metabolic process;cellular process;macromolecule biosynthetic process;macromolecule metabolic process;metabolic process;negative regulation of biological process;negative regulation of bi…	aspartic-type endopeptidase activity;aspartic-type peptidase activity;catalytic activity;endopeptidase activity;hydrolase activity;peptidase activity;peptidase activity, acting on L-amino acid peptides	cell part;cytoplasm;intracellular membrane-bounded organelle;intracellular organelle;intracellular part;membrane-bounded organelle;nucleus;organelle				1	1	1	1	1	1	1	1	2.28197	0.00245255	1.2264	2.51951	Q9BQI9	Q9BQI9	Q9BQI9	NRIP2_HUMAN	>sp|Q9BQI9|NRIP2_HUMAN Nuclear receptor-interacting protein 2 OS=Homo sapiens OX=9606 GN=NRIP2 PE=1 SV=3
RRAGD	Ras-related GTP-binding protein D	2.36694	1.24302	+	11.5881	11.7846	11.2241	11.6035	13.1659	12.7291	12.9136	12.76	3078.69	3527.91	2392.16	3111.73	9190.32	6789.55	7715.8	6936.54	3095.21	7326.17	2.36694	+	PD_HC	biological regulation;cell communication;cellular localization;cellular macromolecule localization;cellular process;cellular protein localization;cellular response to acid;cellular response to amine stimulus;cellular response to amino acid stimulus;cellular response to chemical stimulus;cellular response to endogenous stimulus;cellular response to external stimulus;cellular response to extracellu…	binding;catalytic activity;GTP binding;GTPase activity;guanyl nucleotide binding;guanyl ribonucleotide binding;hydrolase activity;hydrolase activity, acting on acid anhydrides;hydrolase activity, acting on acid anhydrides, in phosphorus-containing anhydrides;nucleoside-triphosphatase activity;nucleotide binding;protein binding;protein dimerization activity;protein heterodimerization activity;puri…	cell part;cytoplasm;cytoplasmic part;EGO complex;intracellular membrane-bounded organelle;intracellular organelle;intracellular organelle part;intracellular part;lysosome;lytic vacuole;macromolecular complex;membrane part;membrane-bounded organelle;nucleus;organelle;organelle part;protein complex;vacuolar part;vacuole				1	1	1	1	1	1	1	1	3.89723	0.000719243	1.34207	3.78997	Q9NQL2	Q9NQL2	Q9NQL2	RRAGD_HUMAN	>sp|Q9NQL2|RRAGD_HUMAN Ras-related GTP-binding protein D OS=Homo sapiens OX=9606 GN=RRAGD PE=1 SV=1
ARMC9	LisH domain-containing protein ARMC9	2.34328	1.22853	+	12.1756	12.3036	12.2703	12.1041	13.4657	13.4484	13.4561	13.3011	4626.16	5055.37	4940.02	4402.48	11313	11178.2	11238	10093.2	4783.09	11208.1	2.34328	+	PD_HC			extracellular membrane-bounded organelle;extracellular organelle;extracellular region part;extracellular vesicular exosome;membrane-bounded organelle;membrane-bounded vesicle;organelle;vesicle				12	12	12	12	12	12	12	12	6.0076	0.000377778	1.20444	4.63422	Q7Z3E5	Q7Z3E5	Q7Z3E5	ARMC9_HUMAN	>sp|Q7Z3E5|ARMC9_HUMAN LisH domain-containing protein ARMC9 OS=Homo sapiens OX=9606 GN=ARMC9 PE=1 SV=3
SEC14L2	SEC14-like protein 2	2.34227	1.2279	+	11.8222	11.8508	11.6742	11.6998	12.9929	12.9875	12.9875	13.0824	3621.07	3693.57	3268.02	3326.52	8151.78	8121.33	8121.33	8673.51	3473.8	8136.56	2.34227	+	PD_HC	biological regulation;biosynthetic process;cellular biosynthetic process;cellular macromolecule biosynthetic process;cellular macromolecule metabolic process;cellular metabolic process;cellular nitrogen compound metabolic process;cellular process;macromolecule biosynthetic process;macromolecule metabolic process;metabolic process;nitrogen compound metabolic process;nucleic acid metabolic process;…	binding;lipid binding;phospholipid binding;transporter activity;vitamin binding;vitamin E binding	cell part;cytoplasm;extracellular membrane-bounded organelle;extracellular organelle;extracellular region part;extracellular vesicular exosome;integral to membrane;intracellular membrane-bounded organelle;intracellular organelle;intracellular part;intrinsic to membrane;membrane part;membrane-bounded organelle;membrane-bounded vesicle;nucleus;organelle;vesicle				6	6	6	6	6	6	6	6	6.58755	0.000507463	1.25082	5.00969	O76054	O76054	O76054	S14L2_HUMAN	>sp|O76054|S14L2_HUMAN SEC14-like protein 2 OS=Homo sapiens OX=9606 GN=SEC14L2 PE=1 SV=1
PROS1	Vitamin K-dependent protein S	2.34111	1.22719	+	13.6886	13.4255	13.3348	13.6062	14.8451	14.7206	14.7707	14.6012	13203.2	11002.2	10331.8	12470.2	29432	26998.7	27952.7	24854.2	11736.2	27475.7	2.34111	+	PD_HC	biological regulation;blood coagulation;cell activation;cell migration;cell motility;cellular component movement;cellular macromolecule metabolic process;cellular metabolic process;cellular process;cellular protein metabolic process;coagulation;defense response;establishment of localization;establishment of localization in cell;exocytosis;fibrinolysis;hemostasis;immune response;immune system proc…	binding;calcium ion binding;cation binding;endopeptidase inhibitor activity;endopeptidase regulator activity;enzyme inhibitor activity;enzyme regulator activity;ion binding;metal ion binding;peptidase inhibitor activity;peptidase regulator activity	blood microparticle;cell part;cytoplasmic membrane-bounded vesicle lumen;cytoplasmic part;cytoplasmic vesicle part;endoplasmic reticulum membrane;endoplasmic reticulum part;extracellular membrane-bounded organelle;extracellular organelle;extracellular region;extracellular region part;extracellular space;extracellular vesicular exosome;Golgi apparatus part;Golgi lumen;Golgi membrane;intracellular …	Complement and coagulation cascades		REACT_1050;REACT_118707;REACT_12051;REACT_1439;REACT_1906;REACT_318;REACT_733	17	17	17	17	17	17	17	17	4.84003	0.000275304	1.22065	4.1248	P07225	P07225	P07225	PROS_HUMAN	>sp|P07225|PROS_HUMAN Vitamin K-dependent protein S OS=Homo sapiens OX=9606 GN=PROS1 PE=1 SV=1
TEAD1;TEAD3	Transcriptional enhancer factor TEF-1;Transcriptional enhancer factor TEF-5	2.3388	1.22577	+	11.4692	9.89933	10.9295	9.68343	11.7417	12.0016	11.7187	11.4464	2835.13	954.982	1950.33	822.248	3424.55	4100.55	3370.39	2790.68	1452.65	3397.47	2.3388	+	PD_HC	biological regulation;biosynthetic process;cellular biosynthetic process;cellular macromolecule metabolic process;cellular metabolic process;cellular nitrogen compound metabolic process;cellular process;cellular response to stimulus;female pregnancy;gene expression;hippo signaling cascade;intracellular signal transduction;macromolecule metabolic process;metabolic process;multi-organism process;ni…	binding;DNA binding;nucleic acid binding;nucleic acid binding transcription factor activity;protein binding;RNA polymerase II transcription factor binding;sequence-specific DNA binding transcription factor activity;transcription factor binding	cell part;cytoplasm;cytoplasmic part;Golgi apparatus;intracellular membrane-bounded organelle;intracellular organelle;intracellular organelle part;intracellular part;macromolecular complex;membrane-bounded organelle;nuclear part;nucleoplasm;nucleoplasm part;organelle;organelle part;protein complex;transcription factor complex			REACT_116145;REACT_118713	1	1	1	1	1	1	1	1	1.51208	0.00773843	1.23177	1.92962	P28347;Q99594	P28347;Q99594	P28347;Q99594	TEAD1_HUMAN;TEAD3_HUMAN	>sp|P28347|TEAD1_HUMAN Transcriptional enhancer factor TEF-1 OS=Homo sapiens OX=9606 GN=TEAD1 PE=1 SV=2;>sp|Q99594|TEAD3_HUMAN Transcriptional enhancer factor TEF-5 OS=Homo sapiens OX=9606 GN=TEAD3 PE=1 SV=2
RAPGEF1	Rap guanine nucleotide exchange factor 1	2.32724	1.21862	+	12.6545	12.6274	12.8054	12.2909	13.8162	13.9018	14.0863	13.7347	6447.39	6327.41	7158.29	5011.06	14424.2	15305.9	17394	13631.9	6387.4	14865	2.32724	+	PD_HC	activation of MAPKK activity;activation of protein kinase activity;anatomical structure development;biological adhesion;biological regulation;blood vessel development;cell adhesion;cell development;cell surface receptor linked signaling pathway;cell-cell adhesion;cellular developmental process;cellular macromolecule metabolic process;cellular metabolic process;cellular process;cellular protein me…	enzyme regulator activity;GTPase regulator activity;guanyl-nucleotide exchange factor activity;nucleoside-triphosphatase regulator activity;Rap guanyl-nucleotide exchange factor activity;Ras guanyl-nucleotide exchange factor activity;small GTPase regulator activity	cell part;cytoplasmic part;cytosol;early endosome;endosome;intracellular membrane-bounded organelle;intracellular organelle;intracellular part;membrane-bounded organelle;organelle	Focal adhesion;Insulin signaling pathway;Neurotrophin signaling pathway;Renal cell carcinoma	CRKII-C3G complex;CRKL-PDGFRA-CRK-RAPGEF1 complex	REACT_12076;REACT_17025;REACT_23787	12	12	12	12	12	12	12	12	4.17836	0.000794425	1.29021	3.8847	Q13905	Q13905	Q13905	RPGF1_HUMAN	>sp|Q13905|RPGF1_HUMAN Rap guanine nucleotide exchange factor 1 OS=Homo sapiens OX=9606 GN=RAPGEF1 PE=1 SV=3
RDH10	Retinol dehydrogenase 10	2.30978	1.20775	+	13.4005	13.3231	13.1954	13.1226	14.3907	14.5108	14.4379	14.4983	10813.2	10248.3	9380.18	8918.59	21479.9	23344.6	22194.3	23143.2	9814.25	22668.7	2.30978	+	PD_HC	anatomical structure development;anatomical structure formation involved in morphogenesis;anatomical structure morphogenesis;apocarotenoid metabolic process;appendage morphogenesis;axis elongation;biological regulation;biosynthetic process;branch elongation of an epithelium;branching morphogenesis of a tube;bud elongation involved in lung branching;camera-type eye development;carboxylic acid meta…	alcohol dehydrogenase (NADP+) activity;aldo-keto reductase (NADP) activity;catalytic activity;NADP-retinol dehydrogenase activity;oxidoreductase activity;oxidoreductase activity, acting on CH-OH group of donors;oxidoreductase activity, acting on the CH-OH group of donors, NAD or NADP as acceptor;retinol dehydrogenase activity	cell body;cell part;cytoplasm;cytoplasmic part;endoplasmic reticulum membrane;endoplasmic reticulum part;integral to membrane;intracellular organelle part;intracellular part;intrinsic to membrane;membrane;membrane part;organelle membrane;organelle part	Retinol metabolism		REACT_160156;REACT_268561	8	8	8	8	8	8	8	8	5.65669	0.000352332	1.19904	4.46793	Q8IZV5	Q8IZV5	Q8IZV5	RDH10_HUMAN	>sp|Q8IZV5|RDH10_HUMAN Retinol dehydrogenase 10 OS=Homo sapiens OX=9606 GN=RDH10 PE=1 SV=1
FLNC	Filamin-C	2.30887	1.20719	+	17.1773	17.1074	16.9687	17.0419	18.288	18.1691	18.2764	18.3078	148212	141202	128259	134935	320064	294743	317501	324487	138068	318782	2.30887	+	PD_HC	anatomical structure development;cell development;cell junction assembly;cell junction organization;cellular component assembly;cellular component assembly at cellular level;cellular component organization;cellular component organization at cellular level;cellular component organization or biogenesis;cellular component organization or biogenesis at cellular level;cellular developmental process;ce…	ankyrin binding;binding;cytoskeletal protein binding;protein binding	adherens junction;anchoring junction;cell junction;cell part;cell-substrate adherens junction;cell-substrate junction;contractile fiber part;costamere;cytoplasm;cytoplasmic part;cytoskeleton;cytosol;focal adhesion;intracellular non-membrane-bounded organelle;intracellular organelle;intracellular part;membrane;non-membrane-bounded organelle;organelle;organelle part;plasma membrane;sarcolemma;sarco…	Focal adhesion;MAPK signaling pathway		REACT_20649	111	111	111	111	111	111	111	111	6.21766	0.000382022	1.1865	4.66416	Q14315	Q14315	Q14315	FLNC_HUMAN	>sp|Q14315|FLNC_HUMAN Filamin-C OS=Homo sapiens OX=9606 GN=FLNC PE=1 SV=3
PDLIM5	PDZ and LIM domain protein 5	2.29702	1.19976	+	14.4433	14.5421	14.3022	14.3742	15.6999	15.5018	15.5756	15.6415	22277.5	23856.6	20201.9	21235.6	53228.1	46398.8	48834.1	51116.4	21756.6	49975.3	2.29702	+	PD_HC	biological regulation;regulation of anatomical structure morphogenesis;regulation of biological process;regulation of cell development;regulation of cell differentiation;regulation of cell morphogenesis;regulation of cell morphogenesis involved in differentiation;regulation of cell projection organization;regulation of cellular component biogenesis;regulation of cellular component organization;re…	actin binding;actinin binding;binding;cation binding;cytoskeletal protein binding;enzyme binding;ion binding;kinase binding;metal ion binding;protein binding;protein kinase binding;protein kinase C binding;transition metal ion binding;zinc ion binding	actin cytoskeleton;cell junction;cell part;cell projection;contractile fiber part;cytoplasmic part;cytoskeletal part;cytoskeleton;cytosol;intracellular non-membrane-bounded organelle;intracellular organelle;intracellular organelle part;intracellular part;membrane;neuron projection;non-membrane-bounded organelle;organelle;organelle part;postsynaptic density;postsynaptic membrane;synapse part;synap…				21	21	21	21	21	21	21	21	5.70379	0.000348718	1.18928	4.46133	Q96HC4	Q96HC4	Q96HC4	PDLI5_HUMAN	>sp|Q96HC4|PDLI5_HUMAN PDZ and LIM domain protein 5 OS=Homo sapiens OX=9606 GN=PDLIM5 PE=1 SV=5
LGMN	Legumain	2.2776	1.18752	+	13.6968	13.3147	13.1651	13.2335	14.4758	14.4519	14.4724	14.4326	13278.5	10188.8	9185.23	9631.2	22785.1	22410.7	22731.4	22112.9	9910.01	22571.1	2.2776	+	PD_HC	activation of immune response;activation of innate immune response;antigen processing and presentation;antigen processing and presentation of exogenous antigen;antigen processing and presentation of exogenous peptide antigen;antigen processing and presentation of exogenous peptide antigen via MHC class II;antigen processing and presentation of peptide antigen;antigen processing and presentation o…	catalytic activity;cysteine-type endopeptidase activity;cysteine-type peptidase activity;endopeptidase activity;hydrolase activity;peptidase activity;peptidase activity, acting on L-amino acid peptides	apical part of cell;cell part;cytoplasmic part;endosome;extracellular membrane-bounded organelle;extracellular organelle;extracellular region part;extracellular vesicular exosome;intracellular membrane-bounded organelle;intracellular organelle;intracellular organelle lumen;intracellular organelle part;intracellular part;late endosome;lysosomal lumen;lysosome;lytic vacuole;membrane-bounded organel…	Antigen processing and presentation;Lysosome		REACT_118632;REACT_121399;REACT_13523	6	6	6	6	6	6	6	6	4.05208	0.000879012	1.10565	3.46403	Q99538	Q99538	Q99538	LGMN_HUMAN	>sp|Q99538|LGMN_HUMAN Legumain OS=Homo sapiens OX=9606 GN=LGMN PE=1 SV=1
MID1	E3 ubiquitin-protein ligase Midline-1	2.27268	1.18439	+	12.5163	12.5024	12.5423	12.5689	13.7131	13.5692	13.7144	13.8003	5858.44	5802.26	5964.97	6075.97	13429.3	12154.5	13441.4	14266.1	5911.71	13435.4	2.27268	+	PD_HC	biological regulation;cell surface receptor linked signaling pathway;cellular component organization;cellular component organization at cellular level;cellular component organization or biogenesis;cellular component organization or biogenesis at cellular level;cellular localization;cellular macromolecule localization;cellular process;cellular protein localization;cellular response to chemical sti…	binding;catalytic activity;cation binding;cytoskeletal protein binding;enzyme binding;identical protein binding;ion binding;ligase activity;metal ion binding;microtubule binding;phosphoprotein binding;protein binding;protein dimerization activity;protein heterodimerization activity;protein homodimerization activity;transition metal ion binding;tubulin binding;ubiquitin protein ligase binding;zinc…	cell part;cytoplasmic part;cytoskeletal part;cytosol;intracellular non-membrane-bounded organelle;intracellular organelle;intracellular organelle part;intracellular part;macromolecular complex;microtubule;microtubule associated complex;non-membrane-bounded organelle;organelle;organelle part;protein complex;spindle	Ubiquitin mediated proteolysis		REACT_25078	13	13	13	13	13	13	13	13	6.38565	0.000384181	1.16679	4.66512	O15344	O15344	O15344	TRI18_HUMAN	>sp|O15344|TRI18_HUMAN E3 ubiquitin-protein ligase Midline-1 OS=Homo sapiens OX=9606 GN=MID1 PE=1 SV=1
TAGLN	Transgelin	2.271	1.18333	+	17.4755	17.5734	17.5055	17.5875	18.8461	18.4853	18.5888	18.9674	182243	195039	186072	196954	471239	366969	394263	512574	190555	432751	2.271	+	PD_HC	anatomical structure development;cell differentiation;cellular developmental process;cellular process;developmental process;epithelial cell differentiation;muscle organ development;muscle structure development;organ development		cell part;cytoplasm;intracellular part				19	19	19	19	19	19	19	19	4.31988	0.000701538	1.1864	3.76934	Q01995	Q01995	Q01995	TAGL_HUMAN	>sp|Q01995|TAGL_HUMAN Transgelin OS=Homo sapiens OX=9606 GN=TAGLN PE=1 SV=4
MSN	Moesin	2.27059	1.18307	+	17.6491	17.6273	17.4682	17.606	18.7722	18.7719	18.8484	18.8268	205546	202463	181323	199496	447708	447615	471991	464977	200980	456343	2.27059	+	PD_HC	anatomical structure development;biological adhesion;biological regulation;cell adhesion;cell development;cell migration;cell motility;cell-cell adhesion;cellular component movement;cellular developmental process;cellular process;developmental process;endothelial cell development;epithelial cell development;establishment of endothelial barrier;immune system process;leukocyte cell-cell adhesion;le…	binding;cell adhesion molecule binding;double-stranded RNA binding;enzyme binding;kinase binding;nucleic acid binding;protein binding;protein kinase binding;receptor binding;RNA binding;structural constituent of cytoskeleton;structural molecule activity	adherens junction;anchoring junction;apical part of cell;apical plasma membrane;basolateral plasma membrane;blood microparticle;cell junction;cell part;cell periphery;cell projection;cell projection membrane;cell projection part;cell-substrate adherens junction;cell-substrate junction;cytoplasm;cytoskeleton;extracellular membrane-bounded organelle;extracellular organelle;extracellular region part…	Leukocyte transendothelial migration;Measles;Regulation of actin cytoskeleton		REACT_22365	38	38	38	38	38	38	38	38	6.76356	0.00049635	1.21715	4.96471	P26038	P26038	P26038	MOES_HUMAN	>sp|P26038|MOES_HUMAN Moesin OS=Homo sapiens OX=9606 GN=MSN PE=1 SV=3
IFT22	Intraflagellar transport protein 22 homolog	2.26645	1.18044	+	12.116	12.092	11.9892	12.1348	13.3591	13.2058	13.406	13.1003	4438.94	4365.71	4065.45	4497.16	10507.3	9448.04	10854.5	8781.79	4402.32	9977.66	2.26645	+	PD_HC	biological regulation;cellular component organization;cellular component organization at cellular level;cellular component organization or biogenesis;cellular component organization or biogenesis at cellular level;cellular process;cellular response to stimulus;establishment of localization;establishment of localization in cell;establishment of protein localization;intracellular protein transport;…	binding;catalytic activity;GTP binding;GTPase activity;guanyl nucleotide binding;guanyl ribonucleotide binding;hydrolase activity;hydrolase activity, acting on acid anhydrides;hydrolase activity, acting on acid anhydrides, in phosphorus-containing anhydrides;nucleoside-triphosphatase activity;nucleotide binding;purine nucleotide binding;purine ribonucleoside triphosphate binding;purine ribonucleo…	axoneme part;cell part;cell projection;cell projection part;centrosome;cilium;cytoplasmic part;cytoskeletal part;endomembrane system;intracellular non-membrane-bounded organelle;intracellular organelle;intracellular organelle part;intracellular part;intraflagellar transport particle B;macromolecular complex;microtubule organizing center;non-membrane-bounded organelle;organelle;organelle part;prim…			REACT_268024	5	5	5	5	5	5	5	5	5.30754	0.000307692	1.1848	4.27043	Q9H7X7	Q9H7X7	Q9H7X7	IFT22_HUMAN	>sp|Q9H7X7|IFT22_HUMAN Intraflagellar transport protein 22 homolog OS=Homo sapiens OX=9606 GN=IFT22 PE=1 SV=1
ASS1	Argininosuccinate synthase	2.26438	1.17912	+	16.3088	16.1333	16.0259	16.1617	17.3068	17.195	17.3463	17.3689	81177.9	71879.9	66723.2	73308.9	162131	150041	166631	169262	72594.4	164381	2.26438	+	PD_HC	acute inflammatory response;acute-phase response;aging;amide biosynthetic process;amine biosynthetic process;amine metabolic process;anatomical structure development;arginine biosynthetic process;arginine metabolic process;argininosuccinate metabolic process;aspartate family amino acid metabolic process;aspartate metabolic process;biological regulation;biosynthetic process;carboxylic acid biosynt…	adenyl nucleotide binding;adenyl ribonucleotide binding;amine binding;amino acid binding;argininosuccinate synthase activity;ATP binding;binding;carboxylic acid binding;catalytic activity;identical protein binding;ligase activity;ligase activity, forming carbon-nitrogen bonds;nucleotide binding;protein binding;purine nucleotide binding;purine ribonucleoside triphosphate binding;purine ribonucleot…	cell body fiber;cell part;cell projection;cytoplasm;cytoplasmic part;cytosol;endoplasmic reticulum;extracellular membrane-bounded organelle;extracellular organelle;extracellular region part;extracellular vesicular exosome;intracellular membrane-bounded organelle;intracellular organelle;intracellular organelle part;intracellular part;lysosome;lytic vacuole;membrane;membrane-bounded organelle;membr…	Alanine, aspartate and glutamate metabolism;Arginine and proline metabolism		REACT_847	20	20	20	20	20	20	20	20	5.48451	0.000303571	1.14683	4.24847	P00966	P00966	P00966	ASSY_HUMAN	>sp|P00966|ASSY_HUMAN Argininosuccinate synthase OS=Homo sapiens OX=9606 GN=ASS1 PE=1 SV=2
SNX33	Sorting nexin-33	2.2624	1.17785	+	8.99876	9.2598	10.044	8.69893	10.3884	10.4778	10.1135	10.2335	511.56	613.024	1055.71	415.565	1340.36	1426.04	1107.81	1203.9	562.292	1272.13	2.2624	+	PD_HC	biological regulation;cell cycle cytokinesis;cell cycle phase;cell cycle process;cellular component organization;cellular component organization at cellular level;cellular component organization or biogenesis;cellular component organization or biogenesis at cellular level;cellular membrane organization;cellular process;cytokinesis;cytokinesis after mitosis;endocytosis;endosome organization;endoso…	binding;identical protein binding;lipid binding;phosphatidylinositol binding;phospholipid binding;protein binding	cell part;cytoplasmic membrane-bounded vesicle;cytoplasmic part;cytoplasmic vesicle;cytoplasmic vesicle membrane;cytoplasmic vesicle part;cytosol;endosome;extrinsic to membrane;intracellular membrane-bounded organelle;intracellular organelle;intracellular organelle part;intracellular part;membrane;membrane part;membrane-bounded organelle;membrane-bounded vesicle;organelle;organelle membrane;organ…				1	1	1	1	1	1	1	1	1.90053	0.00512329	1.05291	2.10822	Q8WV41	Q8WV41	Q8WV41	SNX33_HUMAN	>sp|Q8WV41|SNX33_HUMAN Sorting nexin-33 OS=Homo sapiens OX=9606 GN=SNX33 PE=1 SV=1
FAT1	Protocadherin Fat 1	2.26132	1.17717	+	12.2767	12.4536	12.5287	12.2249	13.5149	13.5674	13.5223	13.7143	4961.98	5609.28	5909.01	4786.98	11705.5	12139.3	11765.7	13440.5	5285.63	11952.5	2.26132	+	PD_HC	actin cytoskeleton organization;actin filament organization;actin filament-based process;anatomical structure morphogenesis;biological adhesion;cell adhesion;cell communication;cell migration;cell motility;cell-cell adhesion;cell-cell signaling;cellular component movement;cellular component organization;cellular component organization at cellular level;cellular component organization or biogenesi…	binding;calcium ion binding;cation binding;ion binding;metal ion binding	adherens junction;anchoring junction;cell junction;cell part;cell projection;cell-cell junction;cell-substrate adherens junction;cell-substrate junction;cytoplasmic part;extracellular membrane-bounded organelle;extracellular organelle;extracellular region part;extracellular vesicular exosome;filopodium;focal adhesion;integral to membrane;integral to plasma membrane;intracellular membrane-bounded …				25	25	25	25	25	25	25	25	5.107	0.000302222	1.20872	4.23389	Q14517	Q14517	Q14517	FAT1_HUMAN	>sp|Q14517|FAT1_HUMAN Protocadherin Fat 1 OS=Homo sapiens OX=9606 GN=FAT1 PE=1 SV=2
CTNNAL1	Alpha-catulin	2.25932	1.17589	+	9.54794	0.892803	0.231989	10.1601	9.6321	9.26124	10.0498	9.8168	748.542	1.85678	1.17445	1144.18	793.507	613.636	1059.96	901.885	375.2	847.696	2.25932	+	PD_HC	biological adhesion;biological regulation;cell adhesion;cellular process;cellular response to stimulus;intracellular signal transduction;Ras protein signal transduction;regulation of biological process;regulation of cellular process;response to stimulus;Rho protein signal transduction;signal transduction;small GTPase mediated signal transduction		cell part;cytoplasmic part;cytoskeleton;cytosol;intracellular non-membrane-bounded organelle;intracellular organelle;intracellular part;membrane;non-membrane-bounded organelle;organelle;plasma membrane		Catulin (alpha) - catenin (beta) complex		1	1	1	1	1	1	1	1	0.832058	0.0184034	4.48178	1.5488	Q9UBT7	Q9UBT7	Q9UBT7	CTNL1_HUMAN	>sp|Q9UBT7|CTNL1_HUMAN Alpha-catulin OS=Homo sapiens OX=9606 GN=CTNNAL1 PE=1 SV=2
RPUSD4	Mitochondrial RNA pseudouridine synthase RPUSD4	2.25447	1.17279	+	10.6394	11.5601	10.4315	11.1469	12.1365	12.0381	10.7281	12.3991	1595.07	3019.51	1381	2267.52	4502.47	4205.61	1696.21	5401.33	1931.29	4354.04	2.25447	+	PD_HC	cellular macromolecule metabolic process;cellular metabolic process;cellular nitrogen compound metabolic process;cellular process;macromolecule metabolic process;macromolecule modification;metabolic process;nitrogen compound metabolic process;nucleic acid metabolic process;nucleobase-containing compound metabolic process;primary metabolic process;pseudouridine synthesis;RNA metabolic process;RNA …	catalytic activity;intramolecular transferase activity;isomerase activity;pseudouridine synthase activity	cell part;cytoplasmic part;intracellular membrane-bounded organelle;intracellular organelle;intracellular part;membrane-bounded organelle;mitochondrion;organelle				1	1	1	1	1	1	1	1	1.0036	0.0303943	0.880997	1.35125	Q96CM3	Q96CM3	Q96CM3	RUSD4_HUMAN	>sp|Q96CM3|RUSD4_HUMAN Mitochondrial RNA pseudouridine synthase RPUSD4 OS=Homo sapiens OX=9606 GN=RPUSD4 PE=1 SV=1
SBF2	Myotubularin-related protein 13	2.24915	1.16938	+	11.6581	11.3274	11.6848	11.6922	12.93	12.8115	12.8697	12.4783	3231.75	2569.73	3292.12	3309.05	7804.01	7188.62	7484.55	5706.14	3261.93	7336.59	2.24915	+	PD_HC	axon ensheathment;biological regulation;cellular component assembly;cellular component organization;cellular component organization or biogenesis;cellular process;ensheathment of neurons;macromolecular complex assembly;macromolecular complex subunit organization;myelination;positive regulation of catalytic activity;positive regulation of GTPase activity;positive regulation of hydrolase activity;p…	binding;enzyme regulator activity;GTPase regulator activity;guanyl-nucleotide exchange factor activity;lipid binding;nucleoside-triphosphatase regulator activity;phosphatase regulator activity;phosphatidylinositol binding;phospholipid binding;Rab guanyl-nucleotide exchange factor activity;Ras guanyl-nucleotide exchange factor activity;small GTPase regulator activity	cell part;cytoplasmic part;intracellular organelle part;intracellular part;membrane;organelle membrane;organelle part;vacuolar membrane;vacuolar part				9	9	9	9	9	9	9	9	3.92881	0.000931937	1.18176	3.53865	Q86WG5	Q86WG5	Q86WG5	MTMRD_HUMAN	>sp|Q86WG5|MTMRD_HUMAN Myotubularin-related protein 13 OS=Homo sapiens OX=9606 GN=SBF2 PE=1 SV=1
PPM1M	Protein phosphatase 1M	2.24796	1.16862	+	12.6398	12.2943	12.5635	12.9156	13.872	12.9707	13.8812	13.6619	6382.03	5022.88	6053.27	7726.5	14993	8027.31	15088.9	12961.1	6217.65	13977	2.24796	+	PD_HC	cellular macromolecule metabolic process;cellular metabolic process;cellular process;cellular protein metabolic process;dephosphorylation;macromolecule metabolic process;macromolecule modification;metabolic process;phosphate-containing compound metabolic process;phosphorus metabolic process;primary metabolic process;protein dephosphorylation;protein metabolic process;protein modification process	binding;catalytic activity;cation binding;CTD phosphatase activity;hydrolase activity;hydrolase activity, acting on ester bonds;ion binding;manganese ion binding;metal ion binding;phosphatase activity;phosphoprotein phosphatase activity;phosphoric ester hydrolase activity;protein serine/threonine phosphatase activity;transition metal ion binding	cell part;intracellular membrane-bounded organelle;intracellular organelle;intracellular part;membrane-bounded organelle;nucleus;organelle				1	1	1	1	1	1	1	1	2.13557	0.00398505	0.993174	2.208	Q96MI6	Q96MI6	Q96MI6	PPM1M_HUMAN	>sp|Q96MI6|PPM1M_HUMAN Protein phosphatase 1M OS=Homo sapiens OX=9606 GN=PPM1M PE=2 SV=2
MTARC2	Mitochondrial amidoxime reducing component 2	2.24613	1.16744	+	11.3161	11.7471	11.3012	11.4725	12.5313	12.6353	12.5957	12.4654	2549.68	3437.4	2523.48	2841.62	5919.67	6362.16	6189.9	5655.35	2695.65	6054.78	2.24613	+	PD_HC	detoxification of nitrogen compound;metabolic process;nitrate metabolic process;nitrogen compound metabolic process;oxidation-reduction process;response to chemical stimulus;response to nitrosative stress;response to stimulus;response to stress;response to toxin	binding;catalytic activity;cation binding;coenzyme binding;cofactor binding;ion binding;metal ion binding;molybdenum ion binding;molybdopterin cofactor binding;nitrate reductase activity;oxidoreductase activity;oxidoreductase activity, acting on other nitrogenous compounds as donors;pyridoxal phosphate binding;transition metal ion binding;vitamin B6 binding;vitamin binding	cell part;cytoplasmic part;extracellular membrane-bounded organelle;extracellular organelle;extracellular region part;extracellular vesicular exosome;intracellular membrane-bounded organelle;intracellular organelle;intracellular organelle part;intracellular part;membrane;membrane-bounded organelle;membrane-bounded vesicle;microbody;mitochondrial inner membrane;mitochondrial membrane;mitochondrial…				5	5	5	5	5	5	5	5	4.23188	0.000936842	1.09767	3.54085	Q969Z3	Q969Z3	Q969Z3	MARC2_HUMAN	>sp|Q969Z3|MARC2_HUMAN Mitochondrial amidoxime reducing component 2 OS=Homo sapiens OX=9606 GN=MTARC2 PE=1 SV=1
CNN3	Calponin-3	2.24503	1.16674	+	18.5891	18.6711	18.5861	18.6009	19.7734	19.75	19.8006	19.6913	394345	417408	393526	397584	896162	881744	913218	846588	395965	888953	2.24503	+	PD_HC	actin cytoskeleton organization;actin filament-based process;actomyosin structure organization;cell differentiation;cellular component organization;cellular component organization at cellular level;cellular component organization or biogenesis;cellular component organization or biogenesis at cellular level;cellular developmental process;cellular process;cytoskeleton organization;developmental pro…		actin cytoskeleton;adherens junction;anchoring junction;cell junction;cell part;cell-substrate adherens junction;cell-substrate junction;cytoplasm;cytoskeleton;focal adhesion;intracellular non-membrane-bounded organelle;intracellular organelle;intracellular part;non-membrane-bounded organelle;organelle		Emerin complex 1		16	16	16	16	16	16	16	16	7.59882	0.00048227	1.14201	4.95021	Q15417	Q15417	Q15417	CNN3_HUMAN	>sp|Q15417|CNN3_HUMAN Calponin-3 OS=Homo sapiens OX=9606 GN=CNN3 PE=1 SV=1
IFT43	Intraflagellar transport protein 43 homolog	2.2415	1.16446	+	11.5719	11.7942	11.3556	11.7649	12.9822	12.7846	12.8858	12.7684	3044.31	3551.47	2620.45	3480.07	8091.55	7055.83	7568.54	6977.04	3262.19	7312.19	2.2415	+	PD_HC	anatomical structure morphogenesis;cell part morphogenesis;cell projection morphogenesis;cell projection organization;cellular component morphogenesis;cellular component movement;cellular component organization;cellular component organization at cellular level;cellular component organization or biogenesis;cellular component organization or biogenesis at cellular level;cellular developmental proce…		axoneme part;cell part;cell projection;cell projection part;cilium;cytoplasm;cytoplasmic part;cytoskeletal part;cytoskeleton;intracellular non-membrane-bounded organelle;intracellular organelle;intracellular organelle part;intracellular part;intraflagellar transport particle A;macromolecular complex;microtubule cytoskeleton;microtubule organizing center;non-membrane-bounded organelle;organelle;or…			REACT_268024	2	2	2	2	2	2	2	2	4.45618	0.000620939	1.23361	3.94174	Q96FT9	Q96FT9	Q96FT9	IFT43_HUMAN	>sp|Q96FT9|IFT43_HUMAN Intraflagellar transport protein 43 homolog OS=Homo sapiens OX=9606 GN=IFT43 PE=1 SV=3
TTC17	Tetratricopeptide repeat protein 17	2.23415	1.15973	+	9.35486	9.19865	9.6871	8.69787	10.3072	10.4871	10.4936	10.3884	654.777	587.583	824.342	415.26	1267	1435.26	1441.74	1340.36	621.18	1387.81	2.23415	+	PD_HC	actin cytoskeleton organization;actin filament organization;actin filament polymerization;actin filament-based process;actin polymerization or depolymerization;cellular component assembly;cellular component assembly at cellular level;cellular component organization;cellular component organization at cellular level;cellular component organization or biogenesis;cellular component organization or bi…		actin cytoskeleton;cell part;cytoplasm;cytoskeleton;intracellular non-membrane-bounded organelle;intracellular organelle;intracellular part;membrane;non-membrane-bounded organelle;organelle;plasma membrane				5	5	5	5	5	5	5	5	2.86945	0.00173856	1.18442	2.88461	Q96AE7	Q96AE7	Q96AE7	TTC17_HUMAN	>sp|Q96AE7|TTC17_HUMAN Tetratricopeptide repeat protein 17 OS=Homo sapiens OX=9606 GN=TTC17 PE=1 SV=1
CHTOP	Chromatin target of PRMT1 protein	2.23324	1.15914	+	12.4468	10.2704	11.8332	1.87338	12.4148	12.4111	11.718	12.5052	5582.9	1235.09	3648.78	3.6639	5460.43	5446.45	3368.76	5813.54	2441.94	5453.44	2.23324	+	PD_HC	biological regulation;biosynthetic process;cellular biosynthetic process;cellular macromolecule biosynthetic process;cellular macromolecule metabolic process;cellular metabolic process;cellular nitrogen compound metabolic process;cellular process;establishment of localization;establishment of localization in cell;establishment of RNA localization;intracellular transport;macromolecule biosynthetic…		cell part;intracellular membrane-bounded organelle;intracellular non-membrane-bounded organelle;intracellular organelle;intracellular organelle part;intracellular part;macromolecular complex;membrane-bounded organelle;non-membrane-bounded organelle;nuclear body;nuclear part;nuclear speck;nucleolus;nucleoplasm;nucleoplasm part;organelle;organelle part;protein complex;transcription export complex				3	3	3	3	3	3	3	3	0.607411	0.0443253	3.15631	1.18623	Q9Y3Y2	Q9Y3Y2	Q9Y3Y2	CHTOP_HUMAN	>sp|Q9Y3Y2|CHTOP_HUMAN Chromatin target of PRMT1 protein OS=Homo sapiens OX=9606 GN=CHTOP PE=1 SV=2
COL26A1	Collagen alpha-1(XXVI) chain	2.21108	1.14475	+	11.8365	11.3914	12.0777	11.5983	12.828	12.9051	12.803	12.964	3657.14	2686.29	4322.65	3100.53	7271.31	7670.47	7146.4	7990.11	3378.84	7470.89	2.21108	+	PD_HC	biological regulation;cellular component disassembly;cellular component disassembly at cellular level;cellular component organization;cellular component organization at cellular level;cellular component organization or biogenesis;cellular component organization or biogenesis at cellular level;cellular process;collagen catabolic process;collagen metabolic process;extracellular matrix disassembly;e…		cell part;collagen;cytoplasmic part;endoplasmic reticulum lumen;endoplasmic reticulum part;extracellular matrix;extracellular matrix part;extracellular region;extracellular region part;Golgi apparatus;intracellular membrane-bounded organelle;intracellular organelle;intracellular organelle lumen;intracellular organelle part;intracellular part;membrane;membrane-bounded organelle;membrane-enclosed l…			REACT_121139;REACT_150401	3	3	3	3	3	3	3	3	3.5423	0.00104536	1.14907	3.25651	Q96A83	Q96A83	Q96A83	COQA1_HUMAN	>sp|Q96A83|COQA1_HUMAN Collagen alpha-1(XXVI) chain OS=Homo sapiens OX=9606 GN=COL26A1 PE=1 SV=1
SLC18B1	MFS-type transporter SLC18B1	2.20581	1.14131	+	12.6503	12.6647	12.898	12.9149	14.023	13.831	13.9843	13.8681	6428.65	6493.14	7632.82	7722.76	16647.3	14572.9	16206.7	14952.5	7062.98	15579.6	2.20581	+	PD_HC	cellular process;establishment of localization;transmembrane transport;transport		cell part;integral to membrane;intrinsic to membrane;membrane part				2	2	2	2	2	2	2	2	4.97282	0.000656489	1.14462	4.01125	Q6NT16	Q6NT16	Q6NT16	S18B1_HUMAN	>sp|Q6NT16|S18B1_HUMAN MFS-type transporter SLC18B1 OS=Homo sapiens OX=9606 GN=SLC18B1 PE=1 SV=1
RNF121	RING finger protein 121	2.19882	1.13673	+	10.031	10.5824	10.2937	9.74703	11.0591	11.1799	11.5684	11.4202	1046.24	1533.27	1255.2	859.307	2133.64	2319.99	3036.93	2740.46	1150.72	2530.22	2.19882	+	PD_HC	biological regulation;catabolic process;cellular catabolic process;cellular macromolecule catabolic process;cellular macromolecule metabolic process;cellular metabolic process;cellular process;cellular protein metabolic process;cellular response to chemical stimulus;cellular response to organic substance;cellular response to stimulus;cellular response to stress;cellular response to topologically …	binding;cation binding;ion binding;metal ion binding;transition metal ion binding;zinc ion binding	cell part;cytoplasmic part;endoplasmic reticulum membrane;endoplasmic reticulum part;Golgi apparatus part;Golgi membrane;integral to membrane;intracellular organelle part;intracellular part;intrinsic to membrane;membrane;membrane part;organelle membrane;organelle part				1	1	1	1	1	1	1	1	2.77036	0.00165333	1.1434	2.7715	Q9H920	Q9H920	Q9H920	RN121_HUMAN	>sp|Q9H920|RN121_HUMAN RING finger protein 121 OS=Homo sapiens OX=9606 GN=RNF121 PE=1 SV=1
CSRP2	Cysteine and glycine-rich protein 2	2.19612	1.13496	+	15.7238	15.9656	15.8232	15.778	17.0582	16.8459	16.9614	16.9096	54117.2	63991.8	57977.3	56189	136468	117793	127612	123111	57083.1	125361	2.19612	+	PD_HC	cell differentiation;cellular developmental process;cellular process;developmental process;multicellular organismal development;multicellular organismal process	binding;cation binding;ion binding;metal ion binding;transition metal ion binding;zinc ion binding	adherens junction;anchoring junction;cell junction;cell part;cell-substrate adherens junction;cell-substrate junction;focal adhesion;intracellular membrane-bounded organelle;intracellular organelle;intracellular part;membrane-bounded organelle;nucleus;organelle				11	11	11	11	11	11	11	11	5.47881	0.00028692	1.12114	4.17516	Q16527	Q16527	Q16527	CSRP2_HUMAN	>sp|Q16527|CSRP2_HUMAN Cysteine and glycine-rich protein 2 OS=Homo sapiens OX=9606 GN=CSRP2 PE=1 SV=3
TPM2	Tropomyosin beta chain	2.19258	1.13263	+	16.1896	16.4639	16.0168	16.2601	17.451	17.214	17.2584	17.4793	74740.4	90391.5	66303.6	78483.4	179174	152030	156782	182723	76611.9	167978	2.19258	+	PD_HC	actin filament-based movement;actin filament-based process;actin-mediated cell contraction;actin-myosin filament sliding;biological regulation;cellular component movement;cellular process;multicellular organismal process;muscle contraction;muscle filament sliding;muscle system process;regulation of ATPase activity;regulation of biological process;regulation of catabolic process;regulation of cata…	actin binding;binding;cytoskeletal protein binding;protein binding;structural constituent of muscle;structural molecule activity	cell part;contractile fiber part;cytoplasmic part;cytoskeletal part;cytosol;intracellular organelle part;intracellular part;muscle thin filament tropomyosin;organelle part	Cardiac muscle contraction;Dilated cardiomyopathy;Hypertrophic cardiomyopathy (HCM)		REACT_16969;REACT_20558	12	12	12	12	12	12	12	12	4.1849	0.000949333	1.11807	3.55853	P07951	P07951	P07951	TPM2_HUMAN	>sp|P07951|TPM2_HUMAN Tropomyosin beta chain OS=Homo sapiens OX=9606 GN=TPM2 PE=1 SV=1
NHSL1	NHS-like protein 1	2.18597	1.12827	+	0.296198	7.29014	9.0518	9.33218	9.33557	9.74178	9.17266	9.99949	1.2279	156.513	530.717	644.564	646.08	856.186	577.093	1023.64	343.615	751.133	2.18597	+	PD_HC							1	1	1	1	1	1	1	1	0.702744	0.0331867	3.0698	1.32164	Q5SYE7	Q5SYE7	Q5SYE7	NHSL1_HUMAN	>sp|Q5SYE7|NHSL1_HUMAN NHS-like protein 1 OS=Homo sapiens OX=9606 GN=NHSL1 PE=1 SV=2
SUMF1	Formylglycine-generating enzyme	2.18516	1.12774	+	10.8264	13.2511	0.541202	12.9738	13.2102	13.4647	13.3347	13.4532	1815.81	9749.42	1.45518	8044.57	9476.9	11305.2	10331.1	11215.5	4930.19	10773.3	2.18516	+	PD_HC	cellular lipid metabolic process;cellular macromolecule metabolic process;cellular metabolic process;cellular process;cellular protein metabolic process;glycolipid metabolic process;glycosphingolipid metabolic process;lipid metabolic process;macromolecule metabolic process;macromolecule modification;membrane lipid metabolic process;metabolic process;post-translational protein modification;primary…	binding;catalytic activity;cation binding;ion binding;metal ion binding;oxidoreductase activity	cell part;cytoplasmic part;endoplasmic reticulum lumen;endoplasmic reticulum part;intracellular organelle lumen;intracellular organelle part;intracellular part;membrane-enclosed lumen;organelle lumen;organelle part	Lysosome		REACT_116105;REACT_121036	1	1	1	1	1	1	1	1	0.629911	0.0394814	3.96757	1.23901	Q8NBK3	Q8NBK3	Q8NBK3	SUMF1_HUMAN	>sp|Q8NBK3|SUMF1_HUMAN Formylglycine-generating enzyme OS=Homo sapiens OX=9606 GN=SUMF1 PE=1 SV=3
FLNB	Filamin-B	2.18234	1.12587	+	17.8292	17.0489	17.0186	16.8916	18.1622	18.1132	18.1572	18.1983	232876	135591	132773	121585	293337	283541	292322	300770	134182	292830	2.18234	+	PD_HC	actin cytoskeleton organization;actin filament-based process;anatomical structure development;biological regulation;cell differentiation;cell surface receptor linked signaling pathway;cellular component organization;cellular component organization at cellular level;cellular component organization or biogenesis;cellular component organization or biogenesis at cellular level;cellular developmental …	actin binding;binding;cytoskeletal protein binding;identical protein binding;protein binding	actin cytoskeleton;actin filament bundle;actomyosin;adherens junction;anchoring junction;cell cortex;cell junction;cell part;cell-substrate adherens junction;cell-substrate junction;contractile fiber part;cytoplasm;cytoplasmic part;cytoskeletal part;cytoskeleton;cytosol;extracellular membrane-bounded organelle;extracellular organelle;extracellular region part;extracellular vesicular exosome;focal…	Focal adhesion;MAPK signaling pathway		REACT_115831	121	121	121	121	121	121	121	121	2.38031	0.00303239	0.960674	2.31963	O75369	O75369	O75369	FLNB_HUMAN	>sp|O75369|FLNB_HUMAN Filamin-B OS=Homo sapiens OX=9606 GN=FLNB PE=1 SV=2
MYLK	Myosin light chain kinase, smooth muscle	2.16643	1.11532	+	14.7394	14.5813	14.939	15.0195	15.6518	16.4475	16.2104	15.3802	27352.8	24513.7	31411.4	33213.9	51482.7	89369.8	75825.7	42648.3	29382.1	63654.2	2.16643	+	PD_HC	actin cytoskeleton organization;actin filament organization;actin filament-based process;anatomical structure morphogenesis;aorta smooth muscle tissue morphogenesis;biological regulation;bleb assembly;cell projection assembly;cell projection organization;cellular component assembly;cellular component assembly at cellular level;cellular component organization;cellular component organization at cel…	adenyl nucleotide binding;adenyl ribonucleotide binding;ATP binding;binding;calmodulin-dependent protein kinase activity;catalytic activity;cation binding;ion binding;kinase activity;metal ion binding;myosin light chain kinase activity;nucleotide binding;phosphotransferase activity, alcohol group as acceptor;protein kinase activity;protein serine/threonine kinase activity;purine nucleotide bindin…	actin filament bundle;actomyosin;cell division site part;cell junction;cell part;cell projection;cell-cell junction;cleavage furrow;cytoplasm;cytoplasmic part;cytoskeletal part;cytosol;extracellular membrane-bounded organelle;extracellular organelle;extracellular region part;extracellular vesicular exosome;intracellular organelle part;intracellular part;lamellipodium;membrane-bounded organelle;me…	Calcium signaling pathway;Focal adhesion;Gastric acid secretion;Regulation of actin cytoskeleton;Vascular smooth muscle contraction		REACT_20558;REACT_355347	7	7	7	7	7	7	7	7	2.22554	0.00276564	1.10268	2.37078	Q15746	Q15746	Q15746	MYLK_HUMAN	>sp|Q15746|MYLK_HUMAN Myosin light chain kinase, smooth muscle OS=Homo sapiens OX=9606 GN=MYLK PE=1 SV=4
RETSAT	All-trans-retinol 13,14-reductase	2.16536	1.11461	+	15.2681	14.7771	15.1591	15.2384	16.3177	16.3101	16.3272	16.1994	39459.9	28077	36588.4	38655.9	81680.3	81251.1	82219.9	75249.8	37622.2	81465.7	2.16536	+	PD_HC	biological regulation;cellular hormone metabolic process;cellular lipid metabolic process;cellular metabolic process;cellular process;diterpenoid metabolic process;fat-soluble vitamin metabolic process;hormone metabolic process;isoprenoid metabolic process;lipid metabolic process;metabolic process;oxidation-reduction process;primary metabolic process;regulation of biological quality;regulation of…	all-trans-retinol 13,14-reductase activity;catalytic activity;oxidoreductase activity;oxidoreductase activity, acting on the CH-CH group of donors	cell part;cytoplasmic part;endoplasmic reticulum membrane;endoplasmic reticulum part;intracellular organelle part;intracellular part;membrane;membrane part;nuclear membrane;nuclear outer membrane;nuclear part;organelle membrane;organelle outer membrane;organelle part;outer membrane	Retinol metabolism			12	12	12	12	12	12	12	12	4.24466	0.000680597	1.17791	3.71071	Q6NUM9	Q6NUM9	Q6NUM9	RETST_HUMAN	>sp|Q6NUM9|RETST_HUMAN All-trans-retinol 13,14-reductase OS=Homo sapiens OX=9606 GN=RETSAT PE=1 SV=2
DNAJC25	DnaJ homolog subfamily C member 25	2.16207	1.11241	+	11.6051	12.3608	11.3293	11.1031	12.7477	12.6216	12.425	12.5499	3115.18	5259.83	2573.11	2199.71	6877.65	6302.03	5499.18	5996.48	2844.15	6149.25	2.16207	+	PD_HC			cell part;integral to membrane;intrinsic to membrane;membrane part				1	1	1	1	1	1	1	1	1.89158	0.00632739	0.986472	2.04706	Q9H1X3	Q9H1X3	Q9H1X3	DJC25_HUMAN	>sp|Q9H1X3|DJC25_HUMAN DnaJ homolog subfamily C member 25 OS=Homo sapiens OX=9606 GN=DNAJC25 PE=1 SV=1
TTC8	Tetratricopeptide repeat protein 8	2.15976	1.11087	+	10.4099	10.8386	10.0119	10.5245	11.585	11.5734	11.8536	11.2109	1360.48	1831.23	1032.48	1472.96	3072.08	3047.48	3700.74	2370.38	1416.72	3059.78	2.15976	+	PD_HC	anatomical structure development;anatomical structure formation involved in morphogenesis;axis specification;axon guidance;biological regulation;camera-type eye photoreceptor cell differentiation;cell differentiation;cell projection assembly;cell projection organization;cellular component assembly;cellular component assembly at cellular level;cellular component assembly involved in morphogenesis;…	binding;protein binding;repressing transcription factor binding;RNA polymerase II repressing transcription factor binding;RNA polymerase II transcription factor binding;transcription factor binding	BBSome;cell part;cell projection;cell projection membrane;cell projection part;centrosome;cilium;cilium membrane;cilium part;cytoplasmic part;cytoskeletal part;cytosol;intracellular non-membrane-bounded organelle;intracellular organelle;intracellular organelle part;intracellular part;macromolecular complex;membrane part;microtubule organizing center;non-membrane-bounded organelle;nonmotile primar…			REACT_267948	4	4	4	4	4	4	4	4	2.67098	0.00183471	1.10952	2.66838	Q8TAM2	Q8TAM2	Q8TAM2	TTC8_HUMAN	>sp|Q8TAM2|TTC8_HUMAN Tetratricopeptide repeat protein 8 OS=Homo sapiens OX=9606 GN=TTC8 PE=1 SV=2
DHX57	Putative ATP-dependent RNA helicase DHX57	2.15759	1.10942	+	10.6995	11.2425	12.4768	10.4622	12.0872	12.3144	12.1242	11.9944	1662.92	2422.87	5700.21	1410.7	4351.21	5093.35	4464.24	4080.13	2042.89	4407.73	2.15759	+	PD_HC	cellular macromolecule metabolic process;cellular metabolic process;cellular nitrogen compound metabolic process;cellular process;macromolecule metabolic process;metabolic process;nitrogen compound metabolic process;nucleic acid metabolic process;nucleobase-containing compound metabolic process;primary metabolic process;RNA metabolic process;RNA processing	adenyl nucleotide binding;adenyl ribonucleotide binding;ATP binding;ATPase activity;ATPase activity, coupled;ATP-dependent helicase activity;ATP-dependent RNA helicase activity;binding;catalytic activity;cation binding;helicase activity;hydrolase activity;hydrolase activity, acting on acid anhydrides;hydrolase activity, acting on acid anhydrides, in phosphorus-containing anhydrides;ion binding;me…	cell part;cytoplasmic part;intracellular membrane-bounded organelle;intracellular organelle;intracellular part;membrane-bounded organelle;mitochondrion;nucleus;organelle				4	4	4	4	4	4	4	4	1.03508	0.0277527	0.909795	1.38992	Q6P158	Q6P158	Q6P158	DHX57_HUMAN	>sp|Q6P158|DHX57_HUMAN Putative ATP-dependent RNA helicase DHX57 OS=Homo sapiens OX=9606 GN=DHX57 PE=1 SV=2
AKAP13	A-kinase anchor protein 13	2.15634	1.10858	+	13.1758	12.7626	12.4424	12.6139	13.8154	13.7819	13.8238	13.6296	9253.61	6949.05	5565.9	6268.48	14416.2	14085.3	14500.3	12674.1	6608.77	14250.7	2.15634	+	PD_HC	biological regulation;cell surface receptor linked signaling pathway;cellular macromolecule metabolic process;cellular metabolic process;cellular process;cellular protein metabolic process;cellular response to stimulus;enzyme linked receptor protein signaling pathway;establishment of localization;establishment of localization in cell;intracellular signal transduction;intracellular transport;macro…	binding;cAMP-dependent protein kinase activity;catalytic activity;cation binding;cyclic nucleotide-dependent protein kinase activity;enzyme regulator activity;GTPase regulator activity;guanyl-nucleotide exchange factor activity;ion binding;kinase activity;metal ion binding;molecular transducer activity;nucleoside-triphosphatase regulator activity;phosphotransferase activity, alcohol group as acce…	cell part;cytoplasm;cytoplasmic part;cytosol;intracellular membrane-bounded organelle;intracellular organelle;intracellular part;membrane;membrane-bounded organelle;nucleus;organelle;perinuclear region of cytoplasm			REACT_11051;REACT_13638;REACT_18407	17	17	17	17	17	17	17	17	3.09705	0.00169605	1.01402	2.79267	Q12802	Q12802	Q12802	AKP13_HUMAN	>sp|Q12802|AKP13_HUMAN A-kinase anchor protein 13 OS=Homo sapiens OX=9606 GN=AKAP13 PE=1 SV=2
CERS5	Ceramide synthase 5	2.15	1.10434	+	12.5987	11.9298	12.4026	11.866	13.2505	13.139	13.3842	13.3281	6202.78	3901.46	5414.45	3732.69	9745.36	9020.55	10691.7	10283.9	4657.96	10014.6	2.15	+	PD_HC	biosynthetic process;cellular biosynthetic process;cellular lipid metabolic process;cellular metabolic process;cellular process;ceramide biosynthetic process;ceramide metabolic process;lipid biosynthetic process;lipid metabolic process;membrane lipid biosynthetic process;membrane lipid metabolic process;metabolic process;primary metabolic process;small molecule metabolic process;sphingoid biosynt…	binding;catalytic activity;DNA binding;N-acyltransferase activity;nucleic acid binding;sphingosine N-acyltransferase activity;transferase activity;transferase activity, transferring acyl groups;transferase activity, transferring acyl groups other than amino-acyl groups	cell part;cytoplasmic part;endoplasmic reticulum;endoplasmic reticulum membrane;endoplasmic reticulum part;integral to membrane;intracellular membrane-bounded organelle;intracellular organelle;intracellular organelle part;intracellular part;intrinsic to membrane;membrane;membrane part;membrane-bounded organelle;nuclear membrane;nuclear part;organelle;organelle membrane;organelle part			REACT_115810	1	1	1	1	1	1	1	1	2.92444	0.00168072	1.07615	2.78274	Q8N5B7	Q8N5B7	Q8N5B7	CERS5_HUMAN	>sp|Q8N5B7|CERS5_HUMAN Ceramide synthase 5 OS=Homo sapiens OX=9606 GN=CERS5 PE=1 SV=1
CDK14	Cyclin-dependent kinase 14	2.14979	1.10419	+	12.3488	10.6972	10.7886	9.87808	12.2151	11.8821	11.6714	11.8127	5216.26	1660.27	1768.85	941.019	4754.57	3774.58	3261.68	3597.3	1714.56	3685.94	2.14979	+	PD_HC	biological regulation;cell cycle process;cell division;cell surface receptor linked signaling pathway;cellular process;cellular response to stimulus;G2/M transition of mitotic cell cycle;regulation of biological process;regulation of canonical Wnt receptor signaling pathway;regulation of cell cycle;regulation of cellular process;regulation of response to stimulus;regulation of signal transduction…	adenyl nucleotide binding;adenyl ribonucleotide binding;ATP binding;binding;catalytic activity;cyclin binding;cyclin-dependent protein kinase activity;kinase activity;nucleotide binding;phosphotransferase activity, alcohol group as acceptor;protein binding;protein kinase activity;protein serine/threonine kinase activity;purine nucleotide binding;purine ribonucleoside triphosphate binding;purine r…	cell part;cyclin-dependent protein kinase holoenzyme complex;cytoplasm;cytoplasmic cyclin-dependent protein kinase holoenzyme complex;cytoplasmic part;cytosol;intracellular membrane-bounded organelle;intracellular organelle;intracellular part;macromolecular complex;membrane;membrane-bounded organelle;nucleus;organelle;plasma membrane;protein complex				1	1	1	1	1	1	1	1	0.93164	0.0323005	0.967145	1.3274	O94921	O94921	O94921	CDK14_HUMAN	>sp|O94921|CDK14_HUMAN Cyclin-dependent kinase 14 OS=Homo sapiens OX=9606 GN=CDK14 PE=1 SV=3
CAVIN1	Caveolae-associated protein 1	2.14523	1.10114	+	12.7646	12.5114	12.7078	12.5584	13.6744	13.7954	13.5197	13.9329	6958.69	5838.57	6690.04	6031.91	13073.9	14217.7	11744.5	15639.4	6360.98	13645.8	2.14523	+	PD_HC	biological regulation;biosynthetic process;cellular biosynthetic process;cellular macromolecule biosynthetic process;cellular macromolecule metabolic process;cellular metabolic process;cellular nitrogen compound metabolic process;cellular process;gene expression;macromolecule biosynthetic process;macromolecule metabolic process;metabolic process;nitrogen compound metabolic process;nucleic acid me…	binding;nucleic acid binding;RNA binding;rRNA binding;rRNA primary transcript binding	caveola;cell part;cytoplasm;cytoplasmic part;cytosol;endoplasmic reticulum;intracellular membrane-bounded organelle;intracellular organelle;intracellular organelle part;intracellular part;macromolecular complex;membrane;membrane part;membrane raft;membrane-bounded organelle;mitochondrion;nuclear part;nucleoplasm;nucleus;organelle;organelle part;plasma membrane;plasma membrane part;protein complex			REACT_1074	7	7	7	7	7	7	7	7	4.30725	0.000954424	1.09503	3.57325	Q6NZI2	Q6NZI2	Q6NZI2	CAVN1_HUMAN	>sp|Q6NZI2|CAVN1_HUMAN Caveolae-associated protein 1 OS=Homo sapiens OX=9606 GN=CAVIN1 PE=1 SV=1
CASP6	Caspase-6	2.14491	1.10092	+	13.2228	12.134	12.2603	12.0606	13.3	13.2989	13.3029	13.2572	9560.03	4494.67	4905.89	4271.72	10085.5	10077.8	10105.8	9790.73	4700.28	10081.7	2.14491	+	PD_HC	apoptosis;cell death;cell differentiation;cellular component disassembly;cellular component disassembly at cellular level;cellular component disassembly involved in apoptosis;cellular component organization;cellular component organization at cellular level;cellular component organization or biogenesis;cellular component organization or biogenesis at cellular level;cellular developmental process;c…	binding;catalytic activity;cysteine-type endopeptidase activity;cysteine-type peptidase activity;endopeptidase activity;hydrolase activity;identical protein binding;peptidase activity;peptidase activity, acting on L-amino acid peptides;protein binding	cell part;cytoplasm;cytoplasmic part;cytosol;intracellular organelle part;intracellular part;nuclear part;nucleoplasm;organelle part	Apoptosis		REACT_107;REACT_13472;REACT_13541	8	8	8	8	8	8	8	8	1.73581	0.00925926	0.870373	1.84727	P55212	P55212	P55212	CASP6_HUMAN	>sp|P55212|CASP6_HUMAN Caspase-6 OS=Homo sapiens OX=9606 GN=CASP6 PE=1 SV=2
LAMB2	Laminin subunit beta-2	2.13699	1.09558	+	13.9909	13.9744	13.9527	14.0303	15.105	15.0302	15.1101	15.051	16281	16095.8	15855.5	16731.7	35241.8	33461.2	35366.6	33947.1	16188.4	34594.4	2.13699	+	PD_HC	anatomical structure development;astrocyte development;axon extension;axon extension involved in development;axon extension involved in regeneration;axon guidance;biological adhesion;cell adhesion;cell development;cell growth;cellular component organization;cellular component organization at cellular level;cellular component organization or biogenesis;cellular component organization or biogenesis…	structural molecule activity	basal lamina;basement membrane;extracellular matrix part;extracellular membrane-bounded organelle;extracellular organelle;extracellular region;extracellular region part;extracellular vesicular exosome;laminin complex;laminin-11 complex;laminin-3 complex;macromolecular complex;membrane-bounded organelle;membrane-bounded vesicle;organelle;protein complex;synapse;vesicle	Amoebiasis;ECM-receptor interaction;Focal adhesion;Pathways in cancer;Small cell lung cancer;Toxoplasmosis	ITGA6-ITGB4-Laminin10/12 complex	REACT_163874;REACT_163906;REACT_169262	33	33	33	33	33	33	33	33	7.92974	0.000427673	1.08701	4.81565	P55268	P55268	P55268	LAMB2_HUMAN	>sp|P55268|LAMB2_HUMAN Laminin subunit beta-2 OS=Homo sapiens OX=9606 GN=LAMB2 PE=1 SV=2
EFEMP2	EGF-containing fibulin-like extracellular matrix protein 2	2.1253	1.08767	+	12.3254	11.5556	13.0269	11.9561	13.2778	13.1642	13.3292	13.2016	5132.34	3010.11	8346.18	3973.24	9931.53	9179.5	10291.7	9420.58	4552.79	9676.05	2.1253	+	PD_HC	cellular component organization;cellular component organization at cellular level;cellular component organization or biogenesis;cellular component organization or biogenesis at cellular level;cellular process;extracellular matrix organization;extracellular structure organization	binding;calcium ion binding;cation binding;extracellular matrix structural constituent;ion binding;metal ion binding;structural molecule activity	basement membrane;extracellular matrix part;extracellular membrane-bounded organelle;extracellular organelle;extracellular region;extracellular region part;extracellular vesicular exosome;membrane-bounded organelle;membrane-bounded vesicle;organelle;vesicle			REACT_150331	5	5	5	5	5	5	5	5	1.76445	0.00663158	1.02721	1.99505	O95967	O95967	O95967	FBLN4_HUMAN	>sp|O95967|FBLN4_HUMAN EGF-containing fibulin-like extracellular matrix protein 2 OS=Homo sapiens OX=9606 GN=EFEMP2 PE=1 SV=3
IFT74	Intraflagellar transport protein 74 homolog	2.12514	1.08756	+	11.9627	12.3847	12.4212	11.8176	13.326	13.2961	13.1184	13.2569	3991.46	5347.69	5484.71	3609.54	10268.9	10058.3	8892.66	9788.69	4669.57	9923.5	2.12514	+	PD_HC	anatomical structure development;anatomical structure formation involved in morphogenesis;biological regulation;cell development;cell projection assembly;cell projection organization;cell surface receptor linked signaling pathway;cellular component assembly;cellular component assembly at cellular level;cellular component assembly involved in morphogenesis;cellular component movement;cellular comp…	beta-tubulin binding;binding;chromatin binding;cytoskeletal protein binding;protein binding;tubulin binding	axoneme part;cell part;cell projection;cell projection part;centrosome;cilium;cytoplasmic membrane-bounded vesicle;cytoplasmic part;cytoplasmic vesicle;cytoskeletal part;intracellular membrane-bounded organelle;intracellular non-membrane-bounded organelle;intracellular organelle;intracellular organelle part;intracellular part;intraflagellar transport particle B;macromolecular complex;membrane-bou…			REACT_268024	5	5	5	5	5	5	5	5	3.36704	0.00106916	1.10279	3.08083	Q96LB3	Q96LB3	Q96LB3	IFT74_HUMAN	>sp|Q96LB3|IFT74_HUMAN Intraflagellar transport protein 74 homolog OS=Homo sapiens OX=9606 GN=IFT74 PE=1 SV=1
PLGRKT	Plasminogen receptor (KT)	2.11343	1.07958	+	12.3764	11.7961	11.617	12.0675	13.3887	12.8256	13.1873	12.7064	5317.01	3556.15	3140.98	4292.2	10725.1	7259.23	9327.66	6683.56	3924.17	8293.44	2.11343	+	PD_HC	biological regulation;chemotaxis;defense response;inflammatory response;locomotion;positive regulation of plasminogen activation;positive regulation of protein processing;regulation of biological process;regulation of gene expression;regulation of macromolecule metabolic process;regulation of metabolic process;regulation of plasminogen activation;regulation of primary metabolic process;regulation…		cell part;cytoplasmic part;integral to membrane;integral to plasma membrane;intracellular membrane-bounded organelle;intracellular organelle;intracellular part;intrinsic to membrane;intrinsic to plasma membrane;membrane part;membrane-bounded organelle;mitochondrion;organelle;plasma membrane part				3	3	3	3	3	3	3	3	2.45133	0.00261395	1.06272	2.47725	Q9HBL7	Q9HBL7	Q9HBL7	PLRKT_HUMAN	>sp|Q9HBL7|PLRKT_HUMAN Plasminogen receptor (KT) OS=Homo sapiens OX=9606 GN=PLGRKT PE=1 SV=1
FGFBP3	Fibroblast growth factor-binding protein 3	2.11136	1.07817	+	11.9419	10.2624	11.2177	11.4074	12.801	13.6148	11.7022	11.8245	3934.32	1228.26	2381.57	2716.25	7136.5	12544.8	3332.06	3626.85	2548.91	5381.67	2.11136	+	PD_HC	biological regulation;circulatory system process;multicellular organismal process;positive regulation of biological process;positive regulation of cell communication;positive regulation of cellular process;positive regulation of fibroblast growth factor receptor signaling pathway;positive regulation of response to stimulus;positive regulation of signal transduction;positive regulation of signalin…	binding;carbohydrate binding;fibroblast growth factor binding;glycosaminoglycan binding;growth factor binding;heparin binding;pattern binding;polysaccharide binding;protein binding	extracellular matrix;extracellular region;extracellular region part			REACT_9416	4	4	4	4	4	4	4	4	1.17985	0.0144906	1.27829	1.66022	Q8TAT2	Q8TAT2	Q8TAT2	FGFP3_HUMAN	>sp|Q8TAT2|FGFP3_HUMAN Fibroblast growth factor-binding protein 3 OS=Homo sapiens OX=9606 GN=FGFBP3 PE=1 SV=1
GLIPR2	Golgi-associated plant pathogenesis-related protein 1	2.11066	1.07769	+	13.4322	13.732	13.7037	13.7394	14.8638	14.809	14.6733	14.7821	11053.4	13606.4	13342.1	13676.4	29816	28704.7	26127.8	28174.5	13474.3	28439.6	2.11066	+	PD_HC	biological regulation;positive regulation of biological process;positive regulation of cell communication;positive regulation of cell development;positive regulation of cell differentiation;positive regulation of cell migration;positive regulation of cell morphogenesis involved in differentiation;positive regulation of cell motility;positive regulation of cellular component movement;positive regu…	binding;identical protein binding;protein binding;protein dimerization activity;protein homodimerization activity	cell part;cytoplasmic part;extracellular membrane-bounded organelle;extracellular organelle;extracellular region part;extracellular vesicular exosome;Golgi apparatus part;Golgi membrane;intracellular organelle part;intracellular part;membrane;membrane-bounded organelle;membrane-bounded vesicle;organelle;organelle membrane;organelle part;vesicle				3	3	3	3	3	3	3	3	4.98758	0.000641791	1.13022	3.98261	Q9H4G4	Q9H4G4	Q9H4G4	GAPR1_HUMAN	>sp|Q9H4G4|GAPR1_HUMAN Golgi-associated plant pathogenesis-related protein 1 OS=Homo sapiens OX=9606 GN=GLIPR2 PE=1 SV=3
GSTCD	Glutathione S-transferase C-terminal domain-containing protein	2.1073	1.07539	+	12.0894	10.4484	10.358	9.55291	11.7196	11.3769	11.4353	11.522	4357.85	1397.27	1312.41	751.125	3372.49	2659.43	2769.29	2940.81	1354.84	2855.05	2.1073	+	PD_HC			cell part;cytoplasm;extracellular membrane-bounded organelle;extracellular organelle;extracellular region part;extracellular vesicular exosome;intracellular part;membrane-bounded organelle;membrane-bounded vesicle;organelle;vesicle				3	3	3	3	3	3	3	3	0.840437	0.040778	0.901301	1.22261	Q8NEC7	Q8NEC7	Q8NEC7	GSTCD_HUMAN	>sp|Q8NEC7|GSTCD_HUMAN Glutathione S-transferase C-terminal domain-containing protein OS=Homo sapiens OX=9606 GN=GSTCD PE=1 SV=2
CFAP298	Cilia- and flagella-associated protein 298	2.10718	1.07531	+	13.6078	13.571	13.4683	13.4953	14.5702	14.7613	14.6467	14.4623	12484.1	12169.6	11333.5	11547.6	24325.8	27771.2	25650.5	22572.8	11858.6	24988.2	2.10718	+	PD_HC			cell part;cytoplasmic part;cytosol;intracellular membrane-bounded organelle;intracellular organelle;intracellular part;membrane-bounded organelle;nucleus;organelle				7	7	7	7	7	7	7	7	5.28544	0.000634686	1.07453	3.9673	P57076	P57076	P57076	CF298_HUMAN	>sp|P57076|CF298_HUMAN Cilia- and flagella-associated protein 298 OS=Homo sapiens OX=9606 GN=CFAP298 PE=1 SV=1
VAV2	Guanine nucleotide exchange factor VAV2	2.1062	1.07464	+	13.6042	13.1958	12.8205	12.9141	14.133	14.2458	14.1399	13.9038	12453	9382.78	7233.61	7718.47	17966.2	19427.3	18052.4	15327.1	8550.63	18009.3	2.1062	+	PD_HC	anatomical structure formation involved in morphogenesis;angiogenesis;axon guidance;biological regulation;blood coagulation;cell activation;cell migration;cell motility;cell projection assembly;cell projection organization;cell surface receptor linked signaling pathway;cellular component assembly;cellular component assembly at cellular level;cellular component movement;cellular component organiza…	binding;cation binding;enzyme regulator activity;GTPase regulator activity;guanyl-nucleotide exchange factor activity;ion binding;metal ion binding;nucleoside-triphosphatase regulator activity;Ras guanyl-nucleotide exchange factor activity;Rho guanyl-nucleotide exchange factor activity;small GTPase regulator activity	cell part;cytoplasmic part;cytosol;intracellular part;membrane;plasma membrane	B cell receptor signaling pathway;Chemokine signaling pathway;Fc epsilon RI signaling pathway;Fc gamma R-mediated phagocytosis;Focal adhesion;Leukocyte transendothelial migration;Natural killer cell mediated cytotoxicity;Regulation of actin cytoskeleton;T cell receptor signaling pathway		REACT_11051;REACT_13638;REACT_147814;REACT_160086;REACT_163701;REACT_163834;REACT_1695;REACT_18407;REACT_22272;REACT_263991;REACT_264198;REACT_264464	9	9	9	9	9	9	9	9	2.65847	0.00260664	0.971974	2.49136	P52735	P52735	P52735	VAV2_HUMAN	>sp|P52735|VAV2_HUMAN Guanine nucleotide exchange factor VAV2 OS=Homo sapiens OX=9606 GN=VAV2 PE=1 SV=2
IKBKB	Inhibitor of nuclear factor kappa-B kinase subunit beta	2.10153	1.07144	+	10.6354	10.6745	9.66817	10.4972	11.7994	11.4594	11.8275	11.4202	1590.65	1634.35	813.597	1445.35	3564.29	2815.94	3634.4	2740.46	1518	3190.12	2.10153	+	PD_HC	activation of immune response;activation of innate immune response;antigen receptor-mediated signaling pathway;B cell homeostasis;biological regulation;cell surface receptor linked signaling pathway;cellular macromolecule metabolic process;cellular metabolic process;cellular process;cellular protein metabolic process;cellular response to chemical stimulus;cellular response to cytokine stimulus;ce…	adenyl nucleotide binding;adenyl ribonucleotide binding;ATP binding;binding;catalytic activity;enzyme binding;identical protein binding;IkappaB kinase activity;kinase activity;kinase binding;nucleotide binding;phosphotransferase activity, alcohol group as acceptor;protein binding;protein dimerization activity;protein heterodimerization activity;protein homodimerization activity;protein kinase act…	CD40 receptor complex;cell part;cytoplasm;cytoplasmic part;cytosol;cytosolic part;IkappaB kinase complex;internal side of plasma membrane;intracellular membrane-bounded organelle;intracellular organelle;intracellular part;macromolecular complex;membrane part;membrane raft;membrane-bounded organelle;nucleus;organelle;plasma membrane part;protein complex;receptor complex	Acute myeloid leukemia;Adipocytokine signaling pathway;Apoptosis;B cell receptor signaling pathway;Chagas disease (American trypanosomiasis);Chemokine signaling pathway;Chronic myeloid leukemia;Cytosolic DNA-sensing pathway;Epithelial cell signaling in Helicobacter pylori infection;Hepatitis C;Insulin signaling pathway;MAPK signaling pathway;Neurotrophin signaling pathway;NOD-like receptor signal…	BCL10-CHUK-BCL10-IKBKB complex;CASP8-CHUK-IKBKB-MALT1-BCL10 complex;CHUK-ERC1-IKBKB-IKBKG;CHUK-IKBKB-IKBKG complex;CHUK-IKBKB-MAP3K14 complex;I-kappa-B kinase (IKK) complex;IkappaB kinase complex (IKBKB, CHUK, IKBKAP, NFKBIA, RELA, MAP3K14);IKBKB-CDC37-KIAA1967-HSP90AB1-HSP90AA1 complex;IKBKG-IKBKB complex;IKKA-IKKB complex;IKKB-NIK complex;SRC-3 complex;TNF-alpha/NF-kappa B signaling complex (SE…	REACT_118563;REACT_118656;REACT_12555;REACT_13415;REACT_13696;REACT_163994;REACT_188323;REACT_21281;REACT_22442;REACT_24918;REACT_24969;REACT_25039;REACT_25354;REACT_25374;REACT_355183;REACT_355196;REACT_355226;REACT_75776	2	2	2	2	2	2	2	2	2.5375	0.0017464	1.25781	2.73293	O14920	O14920	O14920	IKKB_HUMAN	>sp|O14920|IKKB_HUMAN Inhibitor of nuclear factor kappa-B kinase subunit beta OS=Homo sapiens OX=9606 GN=IKBKB PE=1 SV=1
IMPACT	Protein IMPACT	2.10114	1.07117	+	12.01	10.9892	11.3241	10.7888	12.2623	12.089	12.3954	12.2123	4124.49	2032.73	2563.86	1769.1	4912.7	4356.64	5387.5	4745.35	2298.29	4829.03	2.10114	+	PD_HC	biological regulation;negative regulation of biological process;negative regulation of cellular metabolic process;negative regulation of cellular process;negative regulation of cellular protein metabolic process;negative regulation of macromolecule metabolic process;negative regulation of metabolic process;negative regulation of phosphate metabolic process;negative regulation of phosphorus metabo…		cell part;cytoplasm;intracellular part				4	4	4	4	4	4	4	4	1.88893	0.00638345	0.961738	2.02376	Q9P2X3	Q9P2X3	Q9P2X3	IMPCT_HUMAN	>sp|Q9P2X3|IMPCT_HUMAN Protein IMPACT OS=Homo sapiens OX=9606 GN=IMPACT PE=1 SV=2
NFXL1	NF-X1-type zinc finger protein NFXL1	2.1011	1.07115	+	10.8061	8.62261	9.76174	10.0355	10.8526	11	10.9521	11.1633	1790.44	394.152	868.114	1049.51	1849.09	2048	1981.12	2293.44	958.812	2014.56	2.1011	+	PD_HC	biological regulation;biosynthetic process;cellular biosynthetic process;cellular macromolecule biosynthetic process;cellular macromolecule metabolic process;cellular metabolic process;cellular nitrogen compound metabolic process;cellular process;macromolecule biosynthetic process;macromolecule metabolic process;metabolic process;negative regulation of biological process;negative regulation of bi…	binding;cation binding;DNA binding;ion binding;metal ion binding;nucleic acid binding;nucleic acid binding transcription factor activity;regulatory region DNA binding;regulatory region nucleic acid binding;RNA polymerase II core promoter proximal region sequence-specific DNA binding transcription factor activity;RNA polymerase II core promoter proximal region sequence-specific DNA binding transcr…	cell part;integral to membrane;intracellular membrane-bounded organelle;intracellular organelle;intracellular part;intrinsic to membrane;membrane;membrane part;membrane-bounded organelle;nucleus;organelle				3	3	3	3	3	3	3	3	1.38757	0.0103878	1.18552	1.8046	Q6ZNB6	Q6ZNB6	Q6ZNB6	NFXL1_HUMAN	>sp|Q6ZNB6|NFXL1_HUMAN NF-X1-type zinc finger protein NFXL1 OS=Homo sapiens OX=9606 GN=NFXL1 PE=1 SV=2
SLIT2	Slit homolog 2 protein	2.09694	1.06828	+	10.711	11.3073	10.7419	10.8593	11.8612	11.8789	11.778	12.1083	1676.22	2534.17	1712.51	1857.7	3720.29	3766.22	3511.81	4415.31	1785.11	3743.25	2.09694	+	PD_HC	anatomical structure development;anatomical structure morphogenesis;apoptosis;apoptosis involved in luteolysis;axon extension;axon extension involved in axon guidance;axon guidance;biological adhesion;biological regulation;blood vessel endothelial cell migration;branching morphogenesis of a tube;cell adhesion;cell death;cell growth;cell migration;cell migration involved in sprouting angiogenesis;…	binding;calcium ion binding;carbohydrate binding;cation binding;chemorepellent activity;enzyme inhibitor activity;enzyme regulator activity;extracellular matrix binding;glycoprotein binding;glycosaminoglycan binding;GTPase inhibitor activity;GTPase regulator activity;heparin binding;identical protein binding;ion binding;laminin binding;laminin-1 binding;metal ion binding;nucleoside-triphosphatase…	cell part;cell surface;cytoplasm;extracellular membrane-bounded organelle;extracellular organelle;extracellular region;extracellular region part;extracellular space;extracellular vesicular exosome;intracellular part;membrane;membrane-bounded organelle;membrane-bounded vesicle;organelle;plasma membrane;vesicle	Axon guidance		REACT_19226;REACT_19230;REACT_19342;REACT_19351;REACT_19376;REACT_22237	2	2	2	2	2	2	2	2	3.18656	0.00173292	1.00169	2.82174	O94813	O94813	O94813	SLIT2_HUMAN	>sp|O94813|SLIT2_HUMAN Slit homolog 2 protein OS=Homo sapiens OX=9606 GN=SLIT2 PE=1 SV=1
TMEM259	Membralin	2.09675	1.06816	+	11.6155	10.9876	10.9294	11.2527	12.0533	11.6889	12.5608	12.3229	3137.72	2030.47	1950.19	2440.06	4250.16	3301.49	6041.96	5123.45	2235.27	4686.8	2.09675	+	PD_HC			cell part;cytoplasm;integral to membrane;intracellular part;intrinsic to membrane;membrane part				1	1	1	1	1	1	1	1	2.11584	0.00444524	0.96019	2.16286	Q4ZIN3	Q4ZIN3	Q4ZIN3	MBRL_HUMAN	>sp|Q4ZIN3|MBRL_HUMAN Membralin OS=Homo sapiens OX=9606 GN=TMEM259 PE=1 SV=1
FBLN2	Fibulin-2	2.09394	1.06622	+	13.1	12.8422	13.38	12.8604	14.0672	13.948	14.3294	14.0354	8779.97	7343.23	10660.6	7436.46	17165.2	15804	20586.3	16791	8108.21	16978.1	2.09394	+	PD_HC	biological regulation;cellular component organization;cellular component organization at cellular level;cellular component organization or biogenesis;cellular component organization or biogenesis at cellular level;cellular process;extracellular matrix organization;extracellular structure organization;positive regulation of biological process;positive regulation of cell adhesion;positive regulatio…	binding;calcium ion binding;cation binding;extracellular matrix binding;extracellular matrix structural constituent;ion binding;metal ion binding;structural molecule activity	extracellular matrix;extracellular membrane-bounded organelle;extracellular organelle;extracellular region;extracellular region part;extracellular vesicular exosome;membrane-bounded organelle;membrane-bounded vesicle;organelle;proteinaceous extracellular matrix;vesicle			REACT_150331	17	17	17	17	17	17	17	17	3.36592	0.00146341	1.04936	2.995	P98095	P98095	P98095	FBLN2_HUMAN	>sp|P98095|FBLN2_HUMAN Fibulin-2 OS=Homo sapiens OX=9606 GN=FBLN2 PE=1 SV=2
ADAM9	Disintegrin and metalloproteinase domain-containing protein 9	2.09278	1.06542	+	13.9589	13.4648	13.3159	13.4569	14.6245	14.5784	14.4567	14.4722	15923.8	11306	10197.3	11244.3	25258.8	24464.5	22485.4	22728.3	11275.1	23596.4	2.09278	+	PD_HC	activation of MAPKK activity;activation of protein kinase activity;biological adhesion;biological regulation;cell activation;cell adhesion;cell adhesion mediated by integrin;cell differentiation;cell surface receptor linked signaling pathway;cell-cell adhesion;cell-cell adhesion mediated by integrin;cell-matrix adhesion;cell-substrate adhesion;cellular component disassembly;cellular component dis…	binding;catalytic activity;cation binding;collagen binding;endopeptidase activity;enzyme binding;extracellular matrix binding;hydrolase activity;integrin binding;ion binding;kinase binding;laminin binding;metal ion binding;metalloendopeptidase activity;metallopeptidase activity;peptidase activity;peptidase activity, acting on L-amino acid peptides;protein binding;protein complex binding;protein d…	adherens junction;anchoring junction;basolateral plasma membrane;cell junction;cell part;cell surface;cell-substrate adherens junction;cell-substrate junction;cytoplasm;extracellular membrane-bounded organelle;extracellular organelle;extracellular region part;extracellular space;extracellular vesicular exosome;focal adhesion;integral to membrane;intracellular part;intrinsic to external side of pl…		ITGA9-ITGB1-ADAM9 complex;ITGAV-ITGB5-ADAM9 complex	REACT_150401	13	13	13	13	13	13	13	13	3.27438	0.00176303	0.983824	2.83859	Q13443	Q13443	Q13443	ADAM9_HUMAN	>sp|Q13443|ADAM9_HUMAN Disintegrin and metalloproteinase domain-containing protein 9 OS=Homo sapiens OX=9606 GN=ADAM9 PE=1 SV=1
CCDC80	Coiled-coil domain-containing protein 80	2.08671	1.06123	+	12.8993	12.0076	12.2093	11.925	13.2833	13.1561	13.1901	13.0616	7639.7	4117.63	4735.5	3888.51	9969.46	9128.11	9345.78	8549.36	4426.57	9236.95	2.08671	+	PD_HC	biological regulation;cellular component organization;cellular component organization at cellular level;cellular component organization or biogenesis;cellular component organization or biogenesis at cellular level;cellular process;extracellular matrix organization;extracellular structure organization;positive regulation of biological process;positive regulation of cell adhesion;positive regulatio…	binding;carbohydrate binding;glycosaminoglycan binding;heparin binding;pattern binding;polysaccharide binding	basement membrane;extracellular matrix;extracellular matrix part;extracellular region part;interstitial matrix;proteinaceous extracellular matrix				8	8	8	8	8	8	8	8	2.16684	0.00450131	0.912452	2.14236	Q76M96	Q76M96	Q76M96	CCD80_HUMAN	>sp|Q76M96|CCD80_HUMAN Coiled-coil domain-containing protein 80 OS=Homo sapiens OX=9606 GN=CCDC80 PE=1 SV=1
CHCHD2	Coiled-coil-helix-coiled-coil-helix domain-containing protein 2	2.08301	1.05867	+	13.7962	14.4631	13.6884	13.8722	14.8439	14.8306	14.9514	14.9412	14225.6	22585.4	13201.4	14995.1	29407.6	29137.7	31682.5	31459.3	14610.3	30433.4	2.08301	+	PD_HC	biological regulation;biosynthetic process;cellular biosynthetic process;cellular macromolecule biosynthetic process;cellular macromolecule metabolic process;cellular metabolic process;cellular nitrogen compound metabolic process;cellular process;macromolecule biosynthetic process;macromolecule metabolic process;metabolic process;nitrogen compound metabolic process;nucleic acid metabolic process;…	binding;DNA binding;nucleic acid binding;protein binding;sequence-specific DNA binding;transcription factor binding	cell part;cytoplasmic part;intracellular membrane-bounded organelle;intracellular organelle;intracellular part;membrane-bounded organelle;mitochondrion;nucleus;organelle				1	1	1	1	1	1	1	1	2.74205	0.00265721	0.936785	2.48884	Q9Y6H1	Q9Y6H1	Q9Y6H1	CHCH2_HUMAN	>sp|Q9Y6H1|CHCH2_HUMAN Coiled-coil-helix-coiled-coil-helix domain-containing protein 2 OS=Homo sapiens OX=9606 GN=CHCHD2 PE=1 SV=1
ABHD6	Monoacylglycerol lipase ABHD6	2.08169	1.05776	+	13.7071	13.6895	13.6548	13.8575	14.6889	14.746	14.8354	14.7661	13373.6	13211.4	12897.5	14843.1	26411.9	27478.2	29234.8	27863.7	13292.5	27671	2.08169	+	PD_HC	acylglycerol catabolic process;acylglycerol metabolic process;biological regulation;catabolic process;cellular catabolic process;cellular lipid catabolic process;cellular lipid metabolic process;cellular metabolic process;cellular process;glycerol ether catabolic process;glycerol ether metabolic process;glycerolipid catabolic process;glycerolipid metabolic process;lipid catabolic process;lipid me…	acylglycerol lipase activity;carboxylic ester hydrolase activity;catalytic activity;hydrolase activity;hydrolase activity, acting on ester bonds;lipase activity	alpha-amino-3-hydroxy-5-methyl-4-isoxazolepropionic acid selective glutamate receptor complex;cell part;cytoplasmic part;extracellular membrane-bounded organelle;extracellular organelle;extracellular region part;extracellular vesicular exosome;integral to membrane;intracellular membrane-bounded organelle;intracellular organelle;intracellular part;intrinsic to membrane;ionotropic glutamate recepto…				10	10	10	10	10	10	10	10	5.87582	0.000671875	1.03189	4.06226	Q9BV23	Q9BV23	Q9BV23	ABHD6_HUMAN	>sp|Q9BV23|ABHD6_HUMAN Monoacylglycerol lipase ABHD6 OS=Homo sapiens OX=9606 GN=ABHD6 PE=1 SV=1
[truncated: 6,096 more rows]
